# Supplementary material for: Metabolic classification suggests the GLUT1/ALDOB/G6PD axis as a therapeutic target in chemotherapy-resistant pancreatic cancer
Source: PubMed Central journal article supplement (PMC10518604; doi:10.1016/j.xcrm.2023.101162), 2023-08-18
Supplement: mmc1.pdf [file mmc1.pdf]

**Cell Reports Medicine, Volume 4**

**Supplemental information**

**Metabolic classification suggests**

**the GLUT1/ALDOB/G6PD axis as a therapeutic target**

**in chemotherapy-resistant pancreatic cancer**

**Yunguang Li, Shijie Tang, Xiaohan Shi, Jingwen Lv, Xueyuan Wu, Yehan Zhang, Huan Wang, Juan He, Yiqin Zhu, Yi Ju, Yajuan Zhang, Shiwei Guo, Weiwei Yang, Huiyong Yin, Luonan Chen, Dong Gao, and Gang Jin**

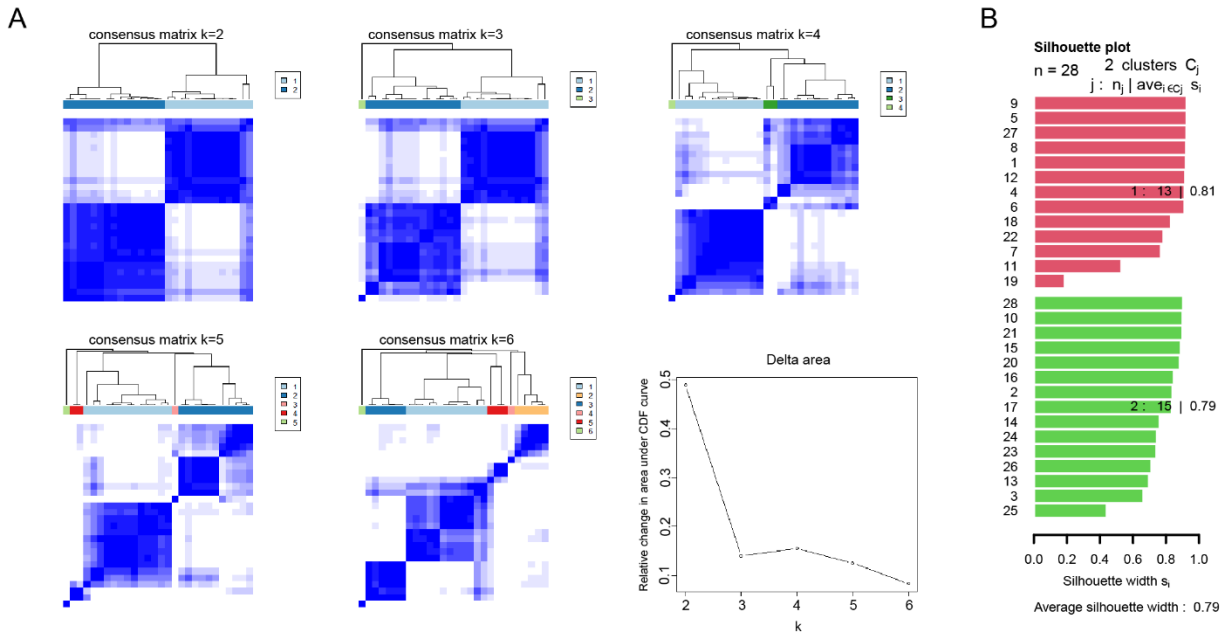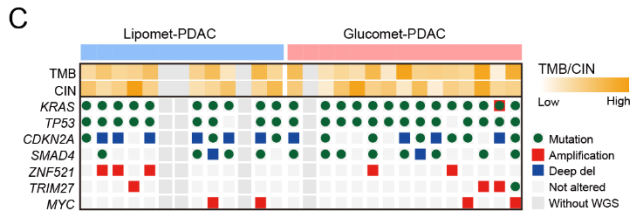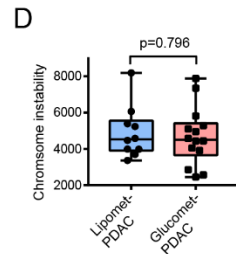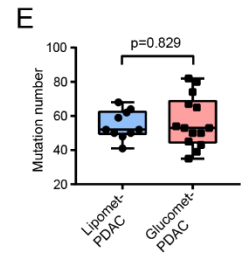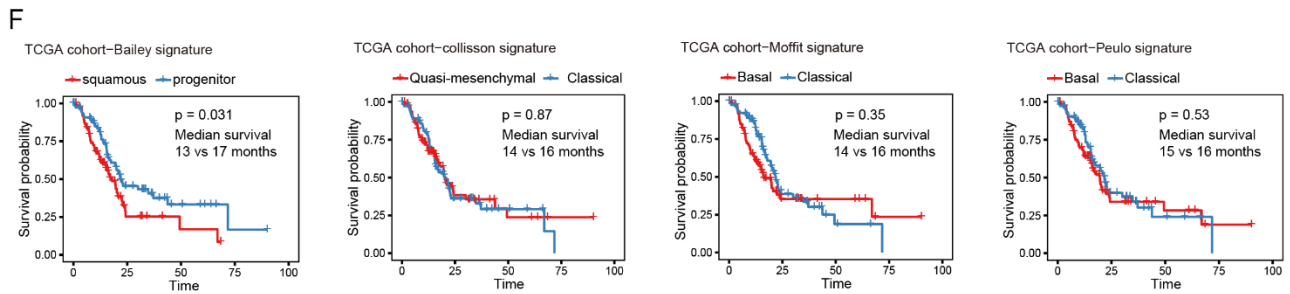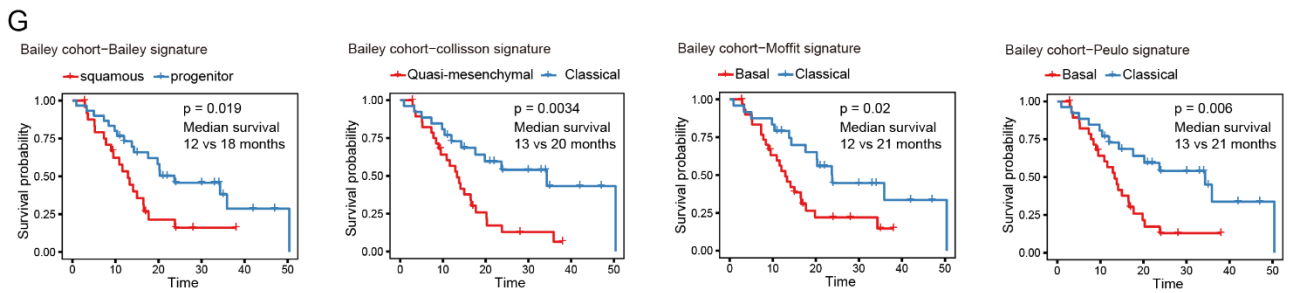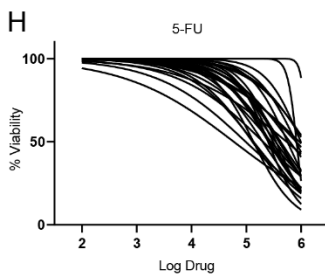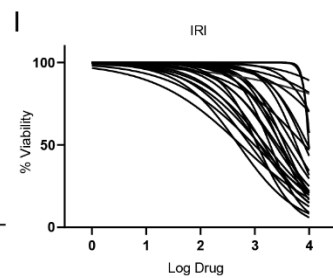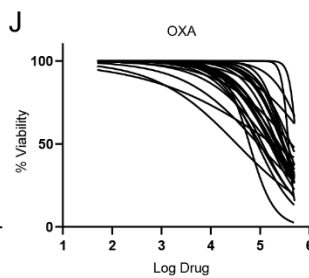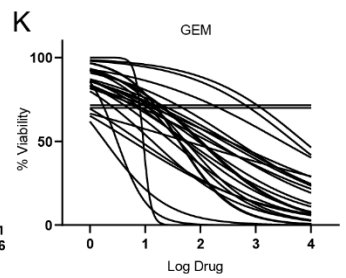

**Figure S1. Metabolic profiles divide PDAC into two subtypes.** Related to Figure 1 and Figure 2. (A) Unsupervised classification of PDAC metabolomics using consensus clustering. Solutions are shown for  $k = 2$  to  $k = 6$  classes. A peak cophenetic correlation is observed for  $k = 2$  classes. (B) Silhouette information for  $k = 2$  classes. (C) Analysis of alterations at the genomic level among the two metabolic subgroups. The gene alterations are indicated as follows: Top cancer-related genes with protein-coding mutations (green); Top cancer-related copy number alteration status is amplification (red) and deep deletion (blue); wild-type (light gray). (D and E) Comparison of chromosome instability (D) and mutation number (E) between glucomet-PDAC and lipomet-PDAC. The boxplot shows the median (central line) and the 25-75% interquartile range (box limits). (F and G) Kaplan-Meier survival curves of the TCGA PDAC cohort (F) and Bailey PDAC cohort (G) split independently by RNA signatures (Bailey signature, Collisson signature, Moffit signature and Peulo signature). (H-K) Dose-response curves and normalized AUC distribution for 5-FU (H), IRI (I), OXA (J), and GEM (K) on glucomet-PDAC and lipomet-PDAC. Statistical significance was computed by unpaired Student's t test (D and E). Statistical significance was computed by log-rank test (F and G).

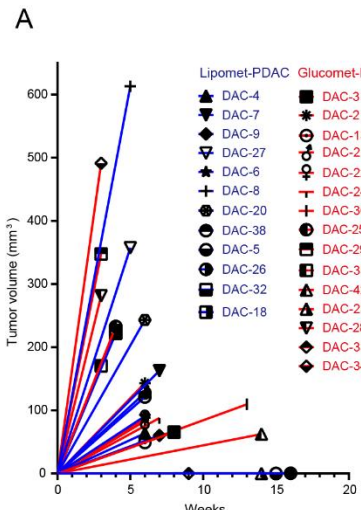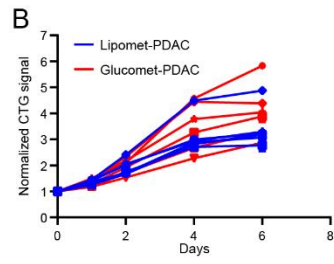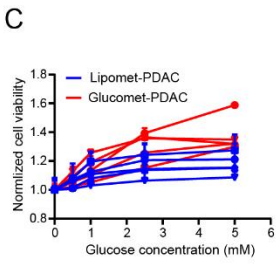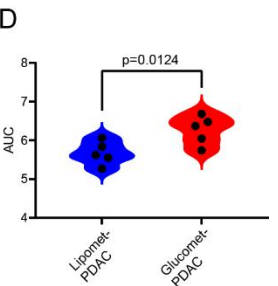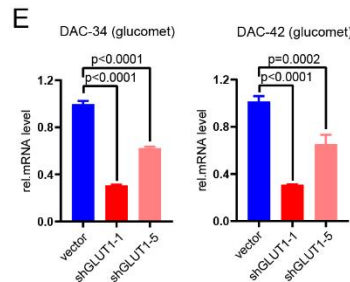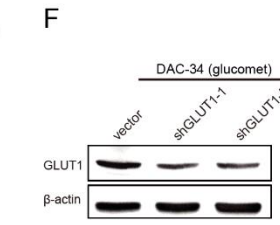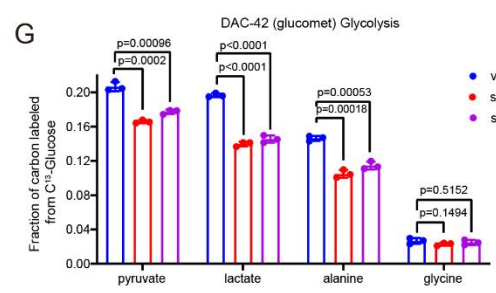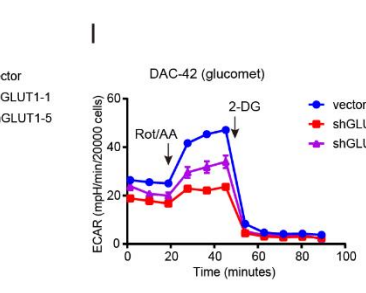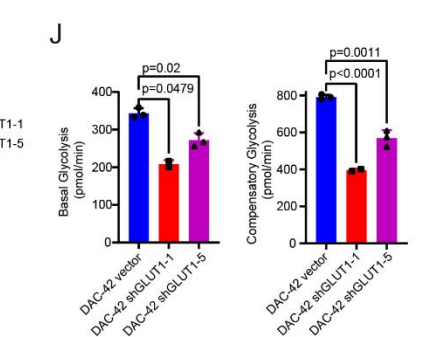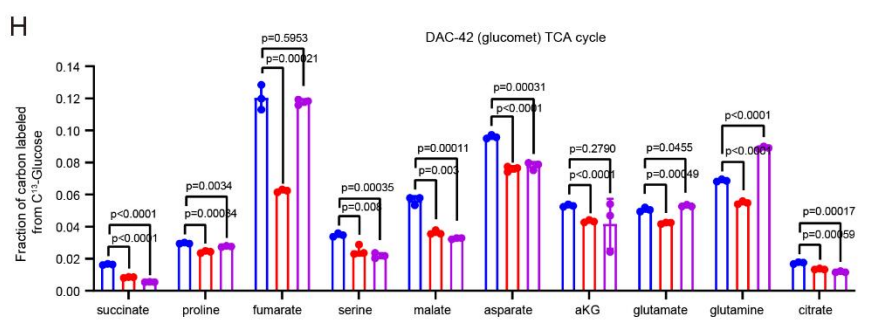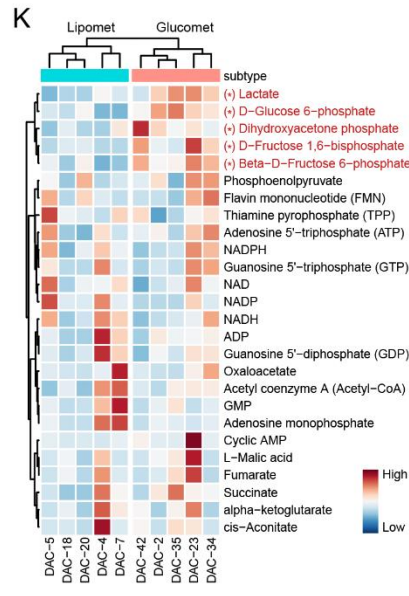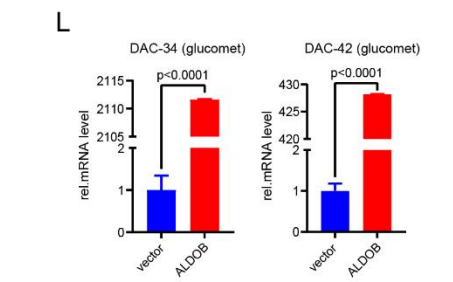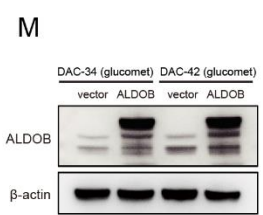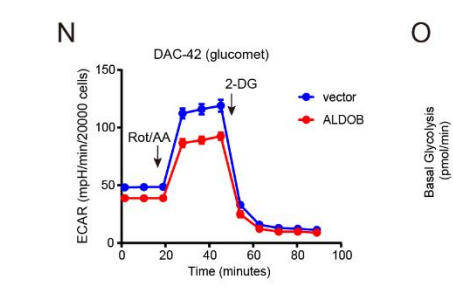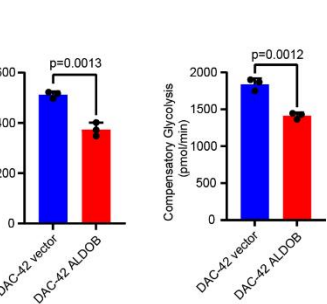

**Figure S2. GLUT1 and ALDOB drive glycolysis and TCA cycle reprogramming in glucomet-PDAC.** Related to Figure 3. (A) Tumor growth curves were analyzed in a xenograft mouse model injected with the indicated organoids. The slope of the curve represents the growth rate of the xenografts. (B) The proliferative rates of represented organoids of two metabolic subtypes in vitro (n = 3 technical replicates). ATP content in cells was detected on days 0, 1, 2, 4 and 6 by CellTiter-Glo assays. (C) CellTiter-Glo assays performed on equal numbers of growtharrested cells from glucomet-PDAC show an elevated signal compared to lipomet-PDAC (n = 3 technical replicates). (D) Normalized AUC distribution for the glucose effect on organoid growth. The significance of the difference was determined by unpaired Student's t test. (E) RT-PCR analysis *GLUT1* knockdown efficiency in the indicated organoids (n = 3 technical replicates). (F) Western blot analysis of GLUT1 knockdown efficiency in DAC-34 (glucomet) organoids. (G and H) Fractions of labeled metabolites in glycolysis (G) and the TCA cycle (H) from [U-<sup>13</sup>C<sub>6</sub>] glucose in control and *GLUT1* knockdown organoids (n = 3 technical replicates). (I and J) Control and *GLUT1* knockdown organoids (DAC-42) were exposed to rotenone/antimycin A and 2-DG to measure the ECAR at the basal level and compensatory level by the Seahorse XF Glycolytic Rate Assay (n = 3 technical replicates). (K) Heatmap of Metabolon-based energy metabolism showing the metabolite intensity differences in glucomet-PDAC and lipomet-PDAC. Red denotes significant intensity differences in metabolites. Significance was computed by the Wilcoxon rank-sum test (\*: p<0.05). (L) RT-PCR analysis of *ALDOB* overexpression efficiency in the indicated organoids (n = 3 technical replicates). (M) Western blot analysis of ALDOB overexpression in DAC-34 (glucomet) and DAC-42 (glucomet) organoids. (N and O) Control and *ALDOB* overexpression organoids (DAC-42) were exposed to rotenone/antimycin A and 2-DG to measure the ECAR at the basal level and compensatory level by the Seahorse XF Glycolytic Rate Assay (n = 3 technical replicates). Data are presented as the mean values ± SEMs, statistical significance was computed by unpaired Student's t test.

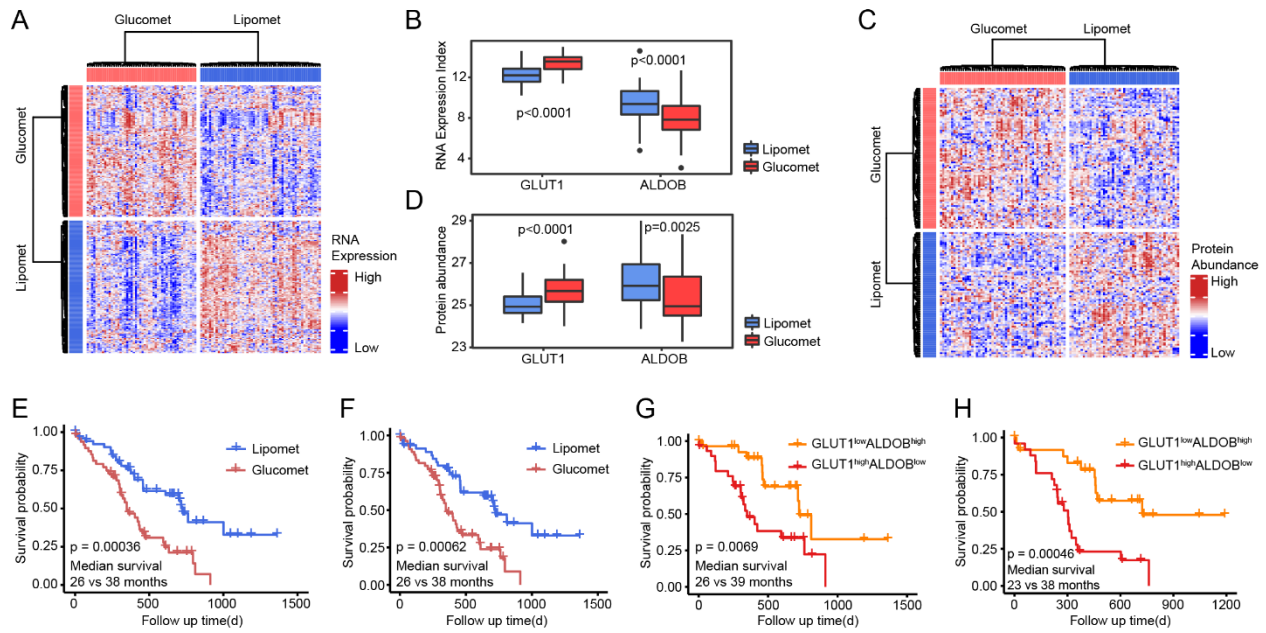

**Figure S3. Consensus-clustered of tumors in the published PDAC cohort split by metabolism signature genes.** Related to Figure 4. (A) Heatmap of tumors in the published PDAC cohort ( $n = 105$ ) split by glucomet and lipomet signature genes in RNA level. (B) Boxplot of *GLUT1* and *ALDOB* RNA expression levels in the PDAC cohort stratified by metabolic subgroup. (C) Heatmap of tumors in the PDAC cohort ( $n = 105$ ) split by glucomet and lipomet signature genes in protein level. (D) Boxplot of *GLUT1* and *ALDOB* protein expression levels in the PDAC cohort stratified by metabolic subgroup. (E and F) Kaplan-Meier survival curves of the Cao PDAC cohort showing differential prognosis among patients with different RNA (E) and protein (F) subtypes. (G and H) Kaplan-Meier survival curves based on the expression of *GLUT1* and *ALDOB* in RNA (G) and protein (H) levels. Data are presented as the mean values  $\pm$  SEMs, statistical significance was computed by limma (B and D). Statistical significance was computed by log-rank test (E-H).

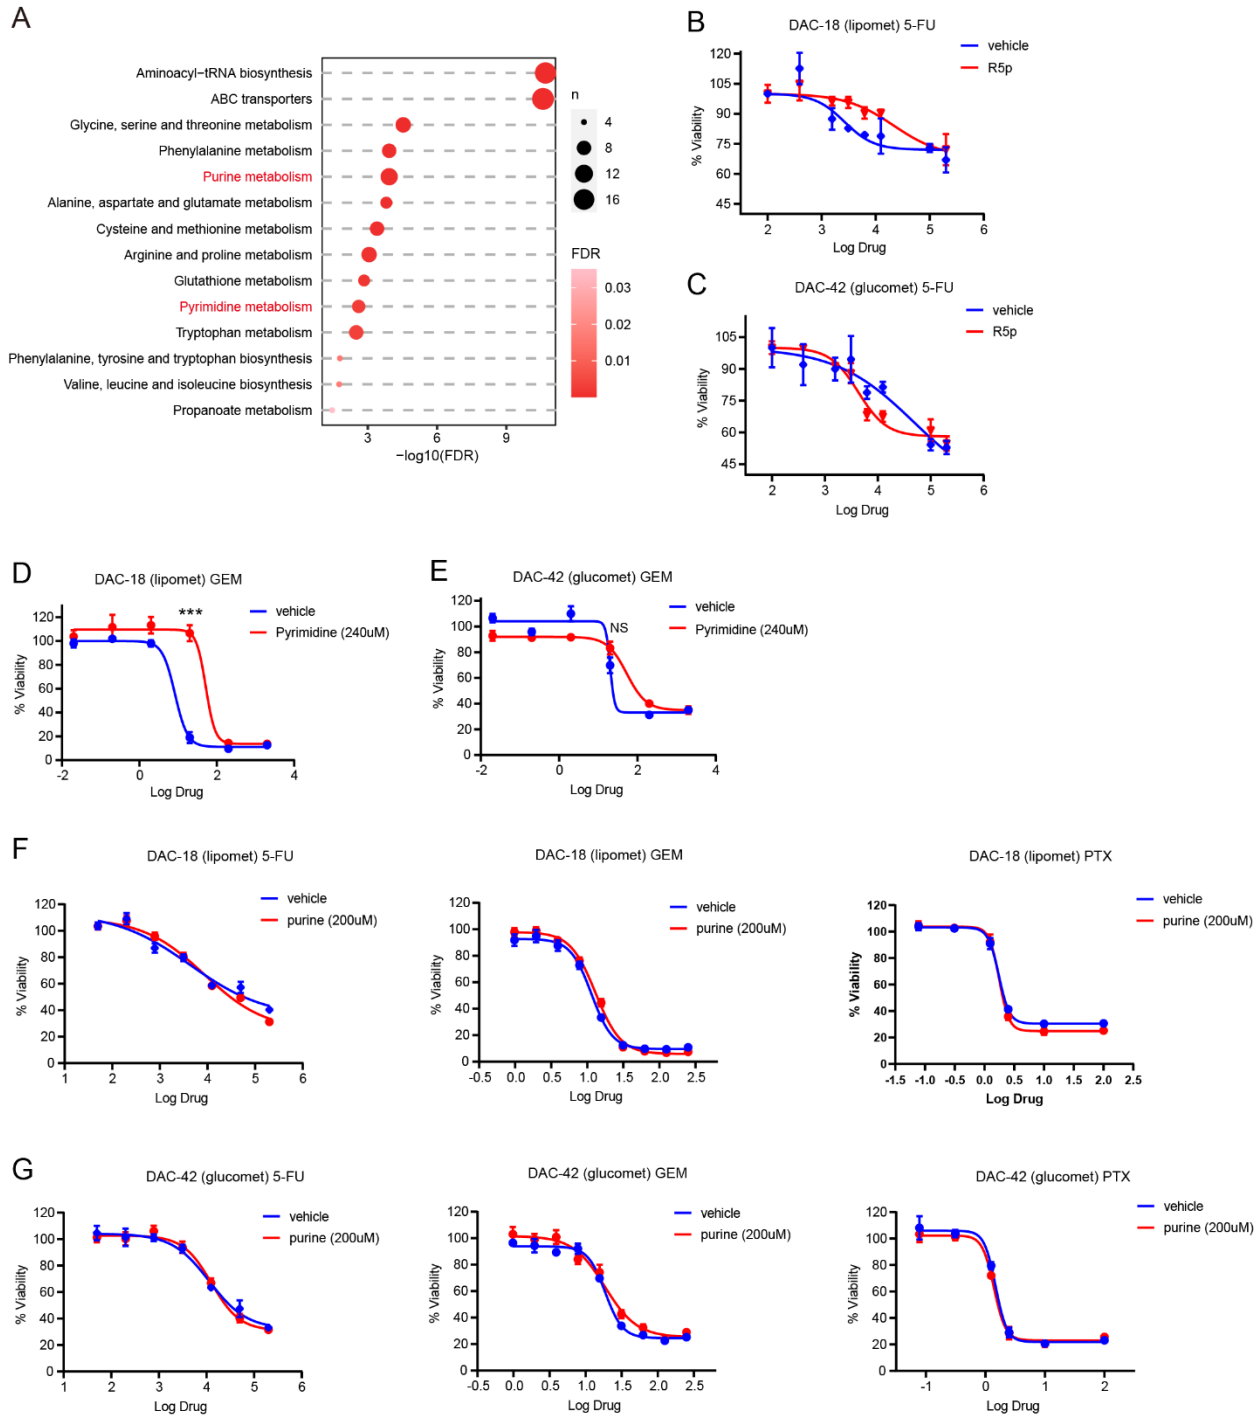

**Figure S4. Increased nucleoside synthesis in glucomet-PDAC.** Related to Figure 5. (A) Enrichment analysis of elevated metabolomics in glucomet subtypes (n = 140 metabolomics, FDR < 0.05, MBROLE 2.0). (B and C) Effect of R5P (1 mM) on 5-FU sensitivity in DAC-18 (lipomet) and DAC-42 (glucomet) cells by CellTiter-Glo assays at 5 days posttreatment. (D and E) DAC-18 (lipomet) and DAC-42 (glucomet) organoids were treated with GEM alone or in combination with pyrimidine nucleosides (uridine, cytidine and thymidine, 240 $\mu$ M), and cell viability was determined by CellTiter-Glo assays. (F and G) DAC-18 (lipomet) and DAC-42 (glucomet) organoids were treated with the indicated chemo alone or in combination with purine nucleosides (guanosine and adenosine, 200  $\mu$ M) for 5 days, and cell viability was determined by CellTiter-Glo assays. All dose-responsive curves are performed with 3 technical replicates. Data are presented as the mean values  $\pm$  SEMs, statistical significance was computed by unpaired Student's t test (\*: p<0.05; \*\*: p<0.01; \*\*\*: p<0.001).

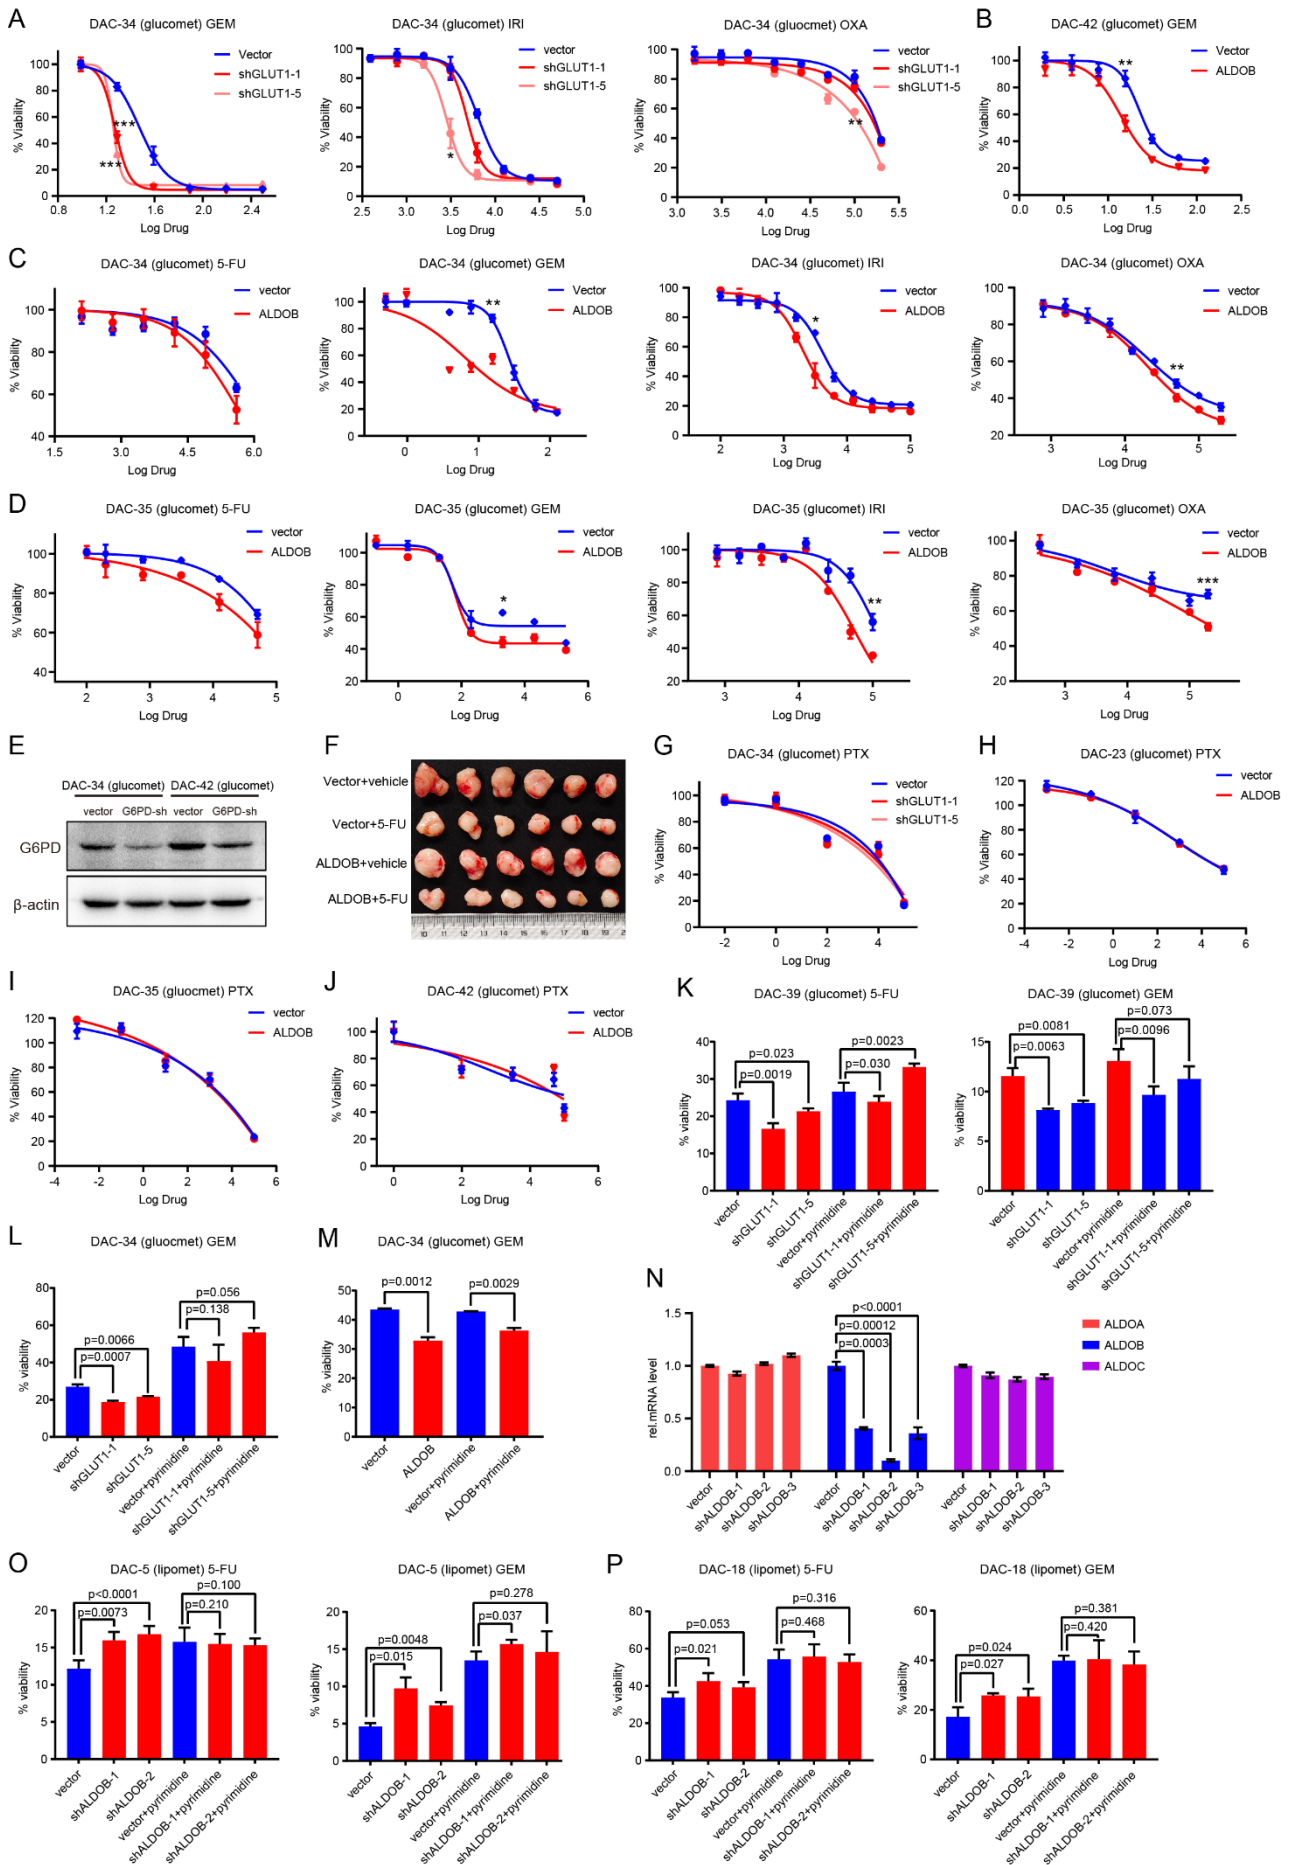



**Figure S5. The GLUT1/ALDOB/G6PD axis contributes to drug resistance.** Related to Figure 5. (A) Effect of *GLUT1* knockdown on GEM, IRI and OXA responsiveness of DAC-34 (glucomet) as determined by CellTiter-Glo assays 120 hr after treatment with GEM, IRI or OXA. (B-D) Effect of *ALDOB* overexpression on the response to the indicated chemotherapy for DAC-42 (glucomet), DAC-34 (glucomet) and DAC-35 (glucomet) as determined by CellTiter-Glo assays 120 hr after treatment with chemotherapy. (E) Western blot analysis of G6PD knockdown efficiency in DAC-34 (glucomet) and DAC-42 (glucomet) organoids. (F) Image of xenografts in the ODX model isolated from each group at day 16 of drug treatment. (G) Effect of *GLUT1* knockdown on PTX of DAC-34 (glucomet) as determined by CellTiter-Glo assays. (H-J) Effect of *ALDOB* overexpression on PTX of DAC-23 (glucomet), DAC-35 (glucomet) and DAC-42 (glucomet) as determined by CellTiter-Glo assays 120 hr after treatment with chemotherapy. (K and L) Effect of pyrimidine nucleotide (240  $\mu$ M) on 5-FU or GEM sensitivity in control and *GLUT1* knockdown organoids by CellTiter-Glo assays at 120 hr posttreatment. (M) Effect of pyrimidine nucleotide (240  $\mu$ M) on GEM sensitivity in control and *ALDOB*-overexpressing organoids by CellTiter-Glo assays at 120 hr posttreatment. (N) RT-PCR analysis of *ALDOB* knockdown efficiency and specificity in DAC-5 (lipomet) organoids. (O and P) Effect of pyrimidine nucleotides (240  $\mu$ M) on 5-FU and GEM sensitivity in control and *ALDOB* knockdown DAC-5 (lipomet) or DAC-18 (lipomet) organoids by CellTiter-Glo assays at 120 hr posttreatment. All dose-responsive curves are performed with 3 technical replicates. All dose-responsive curves are performed with 3 technical replicates. Data are presented as the mean values  $\pm$  SEMs, statistical significance was computed by unpaired Student's t test (\*:  $p < 0.05$ ; \*\*:  $p < 0.01$ ; \*\*\*:  $p < 0.001$ ) (A-D).

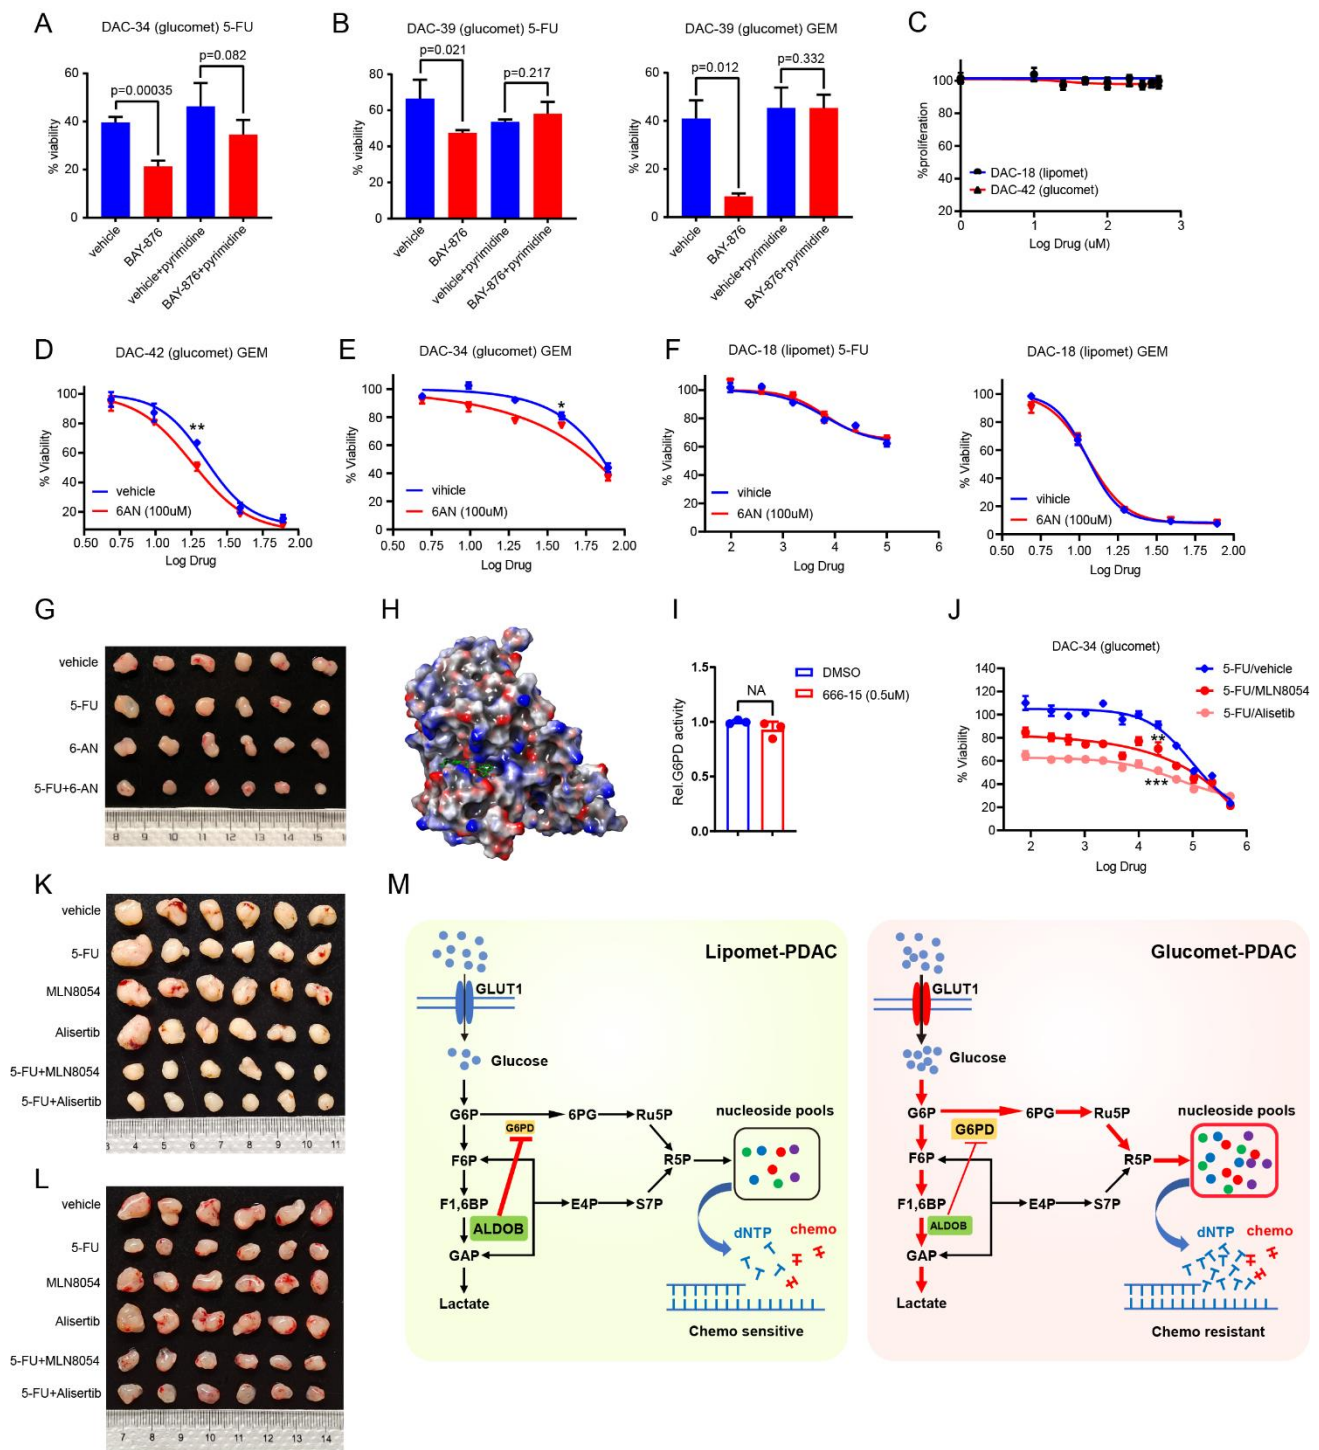

**Figure S6. Pharmacological inhibition of GLUT1 or G6PD improves chemotherapy sensitivity.** Related to Figure 6. (A and B) Effect of pyrimidine nucleotides (240  $\mu$ M) on 5-FU and GEM sensitivity in control and GLUT1 inhibition glucomet-PDAC (DAC-34 and DAC-39) by CellTiter-Glo assays at 120 hr posttreatment (n = 3 technical replicates). (C) The effect of the G6PD inhibitor 6AN on cell viability was evaluated in DAC-18 (lipomet) and DAC-42 (glucomet) organoids (n = 3 technical replicates). (D and E) Effect of 6AN treatment on GEM responsiveness of DAC-42 (D) and DAC-34 (E) organoids as determined by CellTiter-Glo assays 120 hr after treatment with GEM. (F) Effect of 6AN treatment on 5-FU and GEM responsiveness of DAC-18 (lipomet) organoids as determined by CellTiter-Glo assays 120 hr after treatment with 5-FU or GEM. (G) Image of DAC-42 (glucomet) xenografts in the ODX model isolated from each group at day 8 of drug treatment (n = 6 tumors). (H) Prediction of the potential interaction sites in the 3D structure of the G6PD

protein with 666-15. (I) Effect of 666-15 on G6PD activity in DAC-42 (glucomet) organoids (n = 3 technical replicates). (J) Effect of MLN8054 or alisertib treatment on the 5-FU responsiveness of DAC-34 (glucomet) organoids as determined by CellTiter-Glo assays 120 hr after treatment with 5-FU. (K and L) Image of glucomet-PDAC DAC-42 (K) and lipomet-PDAC DAC-18 (L) xenografts in the ODX model isolated from each group with indicated drug treatment (n = 6 tumors). (M) Schematic model for glucose reprogramming explaining the glucomet-PDAC drug resistance mechanism. All dose-responsive curves are performed with 3 technical replicates. Data are presented as the mean values  $\pm$  SEMs, statistical significance was computed by unpaired Student's t test (\*:  $p < 0.05$ ; \*\*:  $p < 0.01$ ; \*\*\*:  $p < 0.001$ ) (A-F, I and J).
