# Supplementary material for: Metabolic classification suggests the GLUT1/ALDOB/G6PD axis as a therapeutic target in chemotherapy-resistant pancreatic cancer
Source: PubMed Central journal article supplement (PMC10518604; doi:10.1016/j.xcrm.2023.101162), 2023-08-18
Supplement: mmc8.pdf [file mmc8.pdf]

# Metabolic classification suggests the GLUT1/ALDOB/G6PD axis as a therapeutic target in chemotherapy-resistant pancreatic cancer

## Graphical abstract

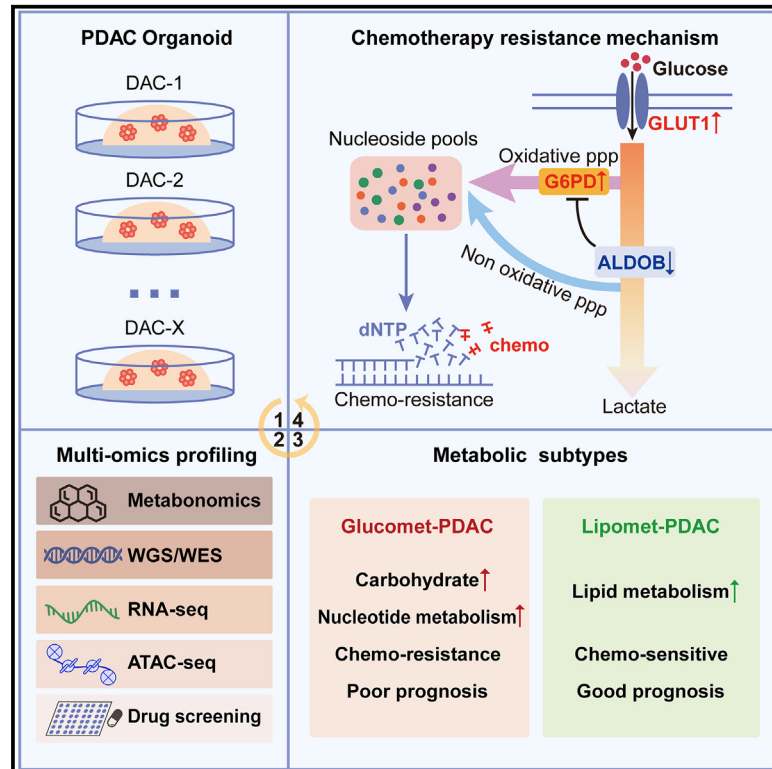

## Authors

Yunguang Li, Shijie Tang, Xiaohan Shi, ..., Luonan Chen, Dong Gao, Gang Jin

## Correspondence

weiweiyang@sibcb.ac.cn (W.Y.),  
hyyin@sibs.ac.cn (H.Y.),  
Inchen@sibcb.ac.cn (L.C.),  
dong.gao@sibcb.ac.cn (D.G.),  
jingang@smmu.edu.cn (G.J.)

## In brief

Li et al. conduct an integrated genetics-metabolomics analysis, classify PDAC organoids into glucomet-PDAC and lipomet-PDAC, and develop a promising pharmacological strategy for patients with chemotherapy-resistant glucomet-PDAC through the combination of chemotherapy and GLUT1/ALDOB/G6PD axis inhibitors.

## Highlights

- Deep metabolism landscape of pancreatic ductal adenocarcinoma organoids
- Identify metabolic subtypes with prognostic significance and therapeutic implications
- Chemotherapy-resistant glucomet-PDAC depends on GLUT1/ALDOB/G6PD axis
- GLUT1/ALDOB/G6PD axis is potential target for chemotherapy-resistant glucomet-PDAC

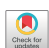

## Article

# Metabolic classification suggests the GLUT1/ALDOB/G6PD axis as a therapeutic target in chemotherapy-resistant pancreatic cancer

Yunguang Li,<sup>1,2,8</sup> Shijie Tang,<sup>1,2,8</sup> Xiaohan Shi,<sup>3,8</sup> Jingwen Lv,<sup>4,8</sup> Xueyuan Wu,<sup>1,2,8</sup> Yehan Zhang,<sup>1,2,8</sup> Huan Wang,<sup>3</sup> Juan He,<sup>1,2</sup> Yiqin Zhu,<sup>1</sup> Yi Ju,<sup>1</sup> Yajuan Zhang,<sup>1,2</sup> Shiwei Guo,<sup>3</sup> Weiwei Yang,<sup>1,5,\*</sup> Huiyong Yin,<sup>4,6,7,\*</sup> Luonan Chen,<sup>1,5,6,\*</sup> Dong Gao,<sup>1,\*</sup> and Gang Jin<sup>3,9,\*</sup>

<sup>1</sup>State Key Laboratory of Cell Biology, Shanghai Key Laboratory of Molecular Andrology, Shanghai Institute of Biochemistry and Cell Biology, Center for Excellence in Molecular Cell Science, Chinese Academy of Sciences, Shanghai 200031, China

<sup>2</sup>University of Chinese Academy of Sciences, Beijing 100049, China

<sup>3</sup>Department of Hepatobiliary Pancreatic Surgery, Changhai Hospital, Second Military Medical University (Naval Medical University), Shanghai 200433, China

<sup>4</sup>CAS Key Laboratory of Nutrition, Metabolism and Food Safety Research, Shanghai Institute of Nutrition and Health (SINH), Innovation Center for Intervention of Chronic Disease and Promotion of Health, Chinese Academy of Sciences (CAS), Shanghai 200031, China

<sup>5</sup>Key Laboratory of Systems Health Science of Zhejiang Province, School of Life Science, Hangzhou Institute for Advanced Study, University of Chinese Academy of Sciences, Chinese Academy of Sciences, Hangzhou 310024, China

<sup>6</sup>School of Life Science and Technology, ShanghaiTech University, Shanghai 201210, China

<sup>7</sup>Department of Biomedical Sciences, City University of Hong Kong, Hong Kong SAR, China

<sup>8</sup>These authors contributed equally

<sup>9</sup>Lead contact

\*Correspondence: [weiweiyang@sibcb.ac.cn](mailto:weiweiyang@sibcb.ac.cn) (W.Y.), [hyyin@sibs.ac.cn](mailto:hyyin@sibs.ac.cn) (H.Y.), [lnchen@sibcb.ac.cn](mailto:lnchen@sibcb.ac.cn) (L.C.), [dong.gao@sibcb.ac.cn](mailto:dong.gao@sibcb.ac.cn) (D.G.),

[jingang@smmu.edu.cn](mailto:jingang@smmu.edu.cn) (G.J.)

<https://doi.org/10.1016/j.xcrn.2023.101162>

## SUMMARY

Metabolic reprogramming is known as an emerging mechanism of chemotherapy resistance, but the metabolic signatures of pancreatic ductal adenocarcinomas (PDACs) remain unclear. Here, we characterize the metabolomic profile of PDAC organoids and classify them into glucomet-PDAC (high glucose metabolism levels) and lipomet-PDAC (high lipid metabolism levels). Glucomet-PDACs are more resistant to chemotherapy than lipomet-PDACs, and patients with glucomet-PDAC have a worse prognosis. Integrated analyses reveal that the GLUT1/aldolase B (ALDOB)/glucose-6-phosphate dehydrogenase (G6PD) axis induces chemotherapy resistance by remodeling glucose metabolism in glucomet-PDAC. Increased glycolytic flux, G6PD activity, and pyrimidine biosynthesis are identified in glucomet-PDAC with high GLUT1 and low ALDOB expression, and these phenotypes could be reversed by inhibiting GLUT1 expression or by increasing ALDOB expression. Pharmacological inhibition of GLUT1 or G6PD enhances the chemotherapy response of glucomet-PDAC. Our findings uncover potential metabolic heterogeneity related to differences in chemotherapy sensitivity in PDAC and develop a promising pharmacological strategy for patients with chemotherapy-resistant glucomet-PDAC through the combination of chemotherapy and GLUT1/ALDOB/G6PD axis inhibitors.

## INTRODUCTION

Pancreatic ductal adenocarcinoma (PDAC) is one of the most lethal malignancies and has a 5-year survival rate of 11%.<sup>1</sup> Chemotherapy could significantly prolong the survival of patients with PDAC,<sup>2</sup> but the chemotherapy response rate of patients with PDAC remains low due to complex and unclear drug-resistance mechanisms.<sup>3,4</sup> Although many studies have focused on the classification of PDAC based on genomic and transcriptomic signatures,<sup>5–10</sup> the currently defined signatures of PDAC do not indicate chemotherapy sensitivity or guide treatment decisions. Metabolic reprogramming is recognized

as an emerging mechanism of therapy resistance and presents opportunities for cancer treatment.<sup>2,11–15</sup> However, few studies have examined the metabolic dysregulation and heterogeneity of PDAC because of the presence of abundant stromal cells, making capturing precise tumor-specific metabolite information difficult. Thus, systematically characterizing the metabolic and genomic profiles of PDAC may uncover the underlying molecular details of chemosensitivity and facilitate the development of targeted therapies to prevent or reverse chemotherapy resistance.

Since altered metabolism is one of the hallmarks of cancer, there is growing interest in the relationship between

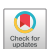

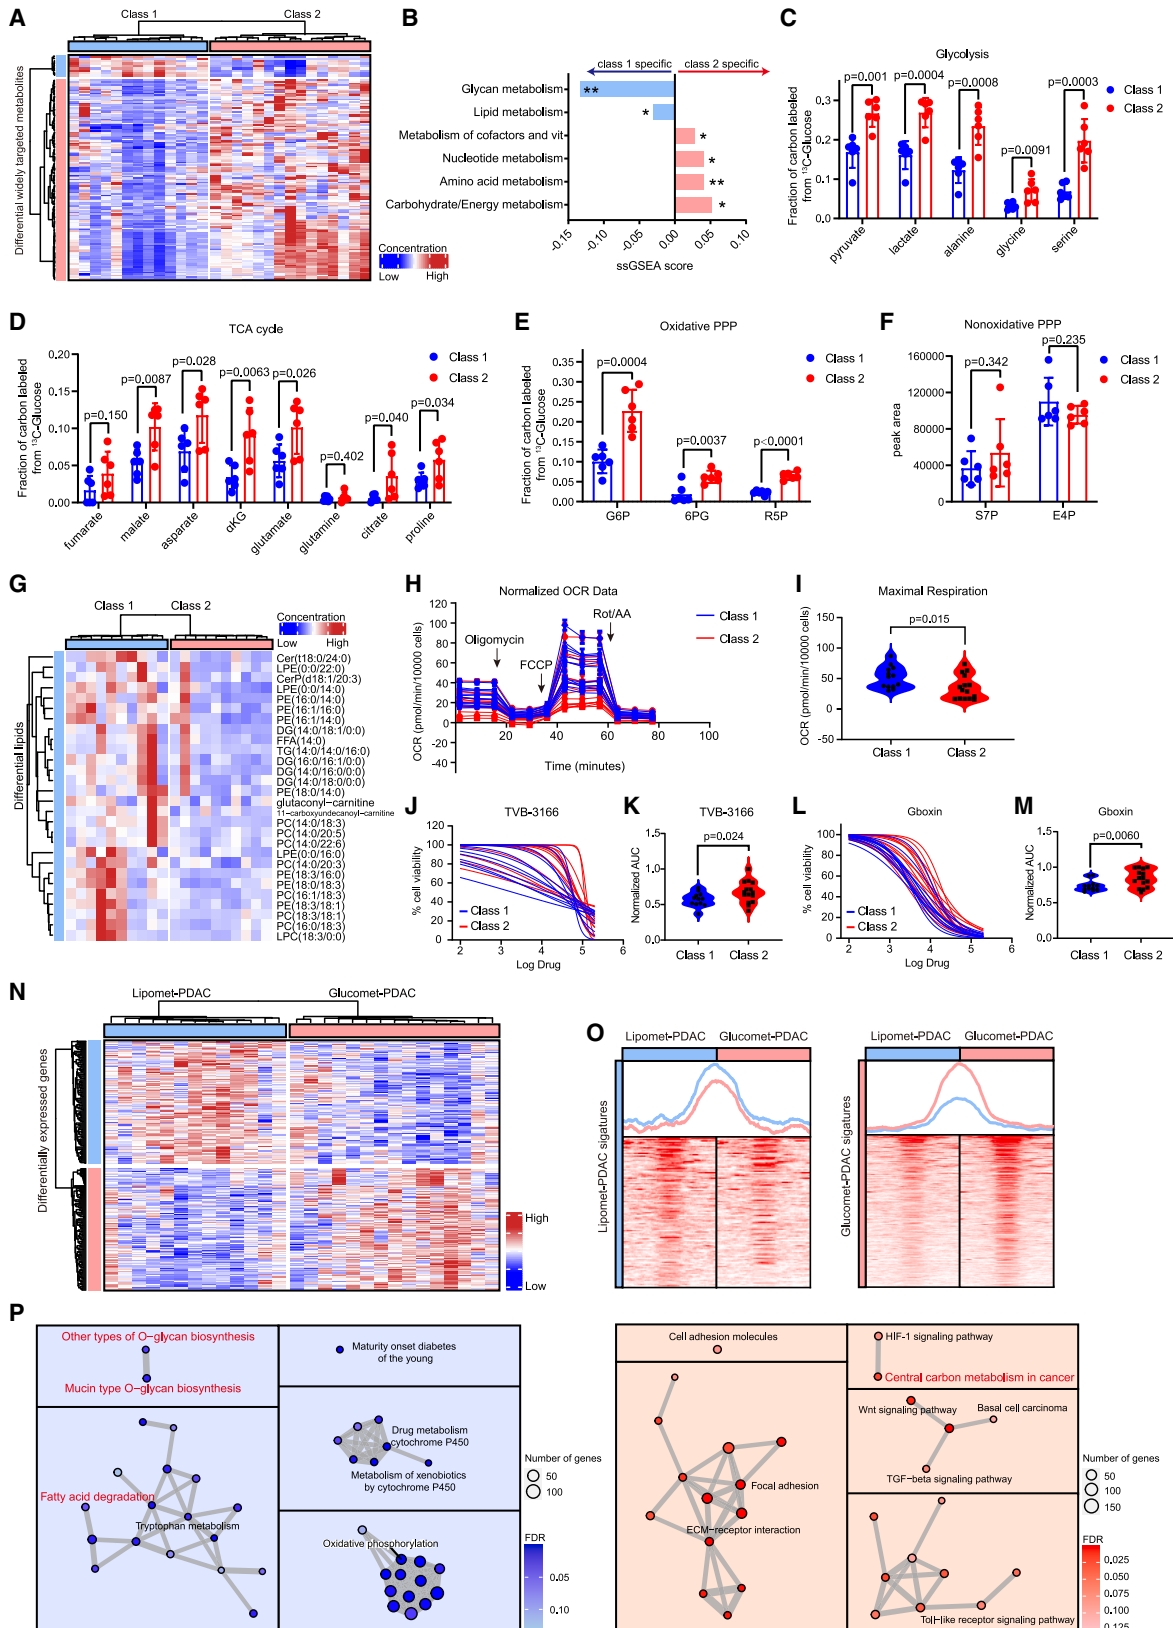

(legend on next page)

metabolism (particularly glucose metabolism) and PDAC initiation, progression, and therapy resistance.<sup>16,17</sup> Previous studies have been conducted in PDAC cell lines with different metabolite levels in glycolysis, lipogenesis, and redox pathways, which exhibit distinct sensitivity to a variety of metabolic inhibitors.<sup>18</sup> Furthermore, intratumoral metabolism heterogeneity within individual PDAC tumors has been identified in contributing to therapy resistance with OXPHOS inhibitors.<sup>19</sup> In mouse models, KRAS mutations and hypoxia are known inducers of the glycolytic pathway in PDAC.<sup>20–22</sup> Disruption of distal cholesterol biosynthesis by conditional inactivation of *Nsdhl* or by treatment with statins switches the classical phenotype to a basal phenotype in mouse models.<sup>23</sup> On the basis of the median normalized expression of glycolytic and cholesterologenic genes, four metabolic expression subtypes were identified, and glycolytic tumors were associated with the shortest median survival.<sup>24</sup> These studies highlight the need to characterize the metabolic signatures and identify essential pathways for PDAC cell survival and chemotherapy resistance, which may provide a therapeutic window.

Patient-derived cancer organoids have emerged as a research model and have proven superior to traditional cell lines in recapitulating the features of primary tumors.<sup>25–30</sup> We have established a large PDAC organoid biobank and characterized these organoids by multiomics integration analysis.<sup>31</sup> Here, we characterized the metabolic profiles of PDAC organoids and identified two metabolic subtypes, termed glucomet-PDAC (high glucose metabolism) and lipomet-PDAC (high lipid metabolism). We found that the GLUT1/aldolase B (ALDOB)/glucose-6-phosphate dehydrogenase (G6PD) axis regulates glucose metabolic reprogramming and confers chemotherapy resistance in glucomet-PDAC. Moreover, we presented a potential pharmacological strategy that involves targeting the GLUT1/ALDOB/G6PD axis to enhance the therapeutic sensitivity of glucomet-PDAC.

## RESULTS

### Metabolite profiling stratifies PDAC into lipomet-PDAC and glucomet-PDAC

To characterize the metabolic profiles of PDAC, we examined metabolites via a widely targeted metabolomics assay in 28 patient-derived PDAC organoids<sup>31</sup> (Table S1). According to the consensus matrix, we identified two optimal metabolic subtypes according to targeted metabolomics (Figures 1A and S1A; Table S2), and this result was further confirmed in silhouette analysis (Figure S1B).

We calculated the enrichment score of previously established metabolic ontologies in the two metabolic subtypes by single-sample gene set enrichment analysis (ssGSEA). Class 2 organoids were characterized by marked enrichment of carbohydrate metabolism, energy metabolism, and nucleotide metabolism, indicating increased glucose metabolism (Figure 1B). We then used [U-<sup>13</sup>C<sub>6</sub>] glucose to track metabolic flux in the two metabolic subtypes and found that metabolic flux in glycolysis and the tricarboxylic acid (TCA) cycle was significantly increased in class 2 (Figures 1C and 1D). Moreover, we noted that the oxidative pentose phosphate pathway (PPP) metabolites G6P, 6PG, and R5P, but not the nonoxidative PPP metabolites S7P and E4P, were highly enriched in class 2 organoids, suggesting glucose metabolic reprogramming in class 2 (Figures 1E and 1F). Thus, we termed class 2 organoids as glucomet-PDAC. Class 1 was characterized by relatively enriched lipid metabolism (Figure 1B). We validated the lipid metabolic dependency of class 1 in three ways. Firstly, we compared the lipid metabolites of two metabolic subtypes by widely targeted lipidomics assay. We found that all significant differential lipids were enriched in class 1 (Figure 1G; Table S2). Secondly, class 1 showed higher oxygen consumption rates than glucomet-PDAC (Figures 1H and 1I). Thirdly, class 1 was more sensitive to the fatty acid synthase inhibitor and oxidative phosphorylation

### Figure 1. Metabolite profiling stratifies PDAC into two subtypes

(A) PDAC organoid subgrouping based on widely targeted metabolite abundance. Differential metabolites were identified by the Wilcoxon rank-sum test ( $p < 0.05$ , fold change  $> 1.2$ ). Samples and metabolites are displayed as columns and rows, respectively, and the color of each organoid shows the relative abundance of the metabolites.

(B) Relative enrichment of the six metabolic ontology classes in class 1 and class 2 organoids, presented as the difference (class 2 versus class 1) in the ssGSEA score. Positive scores represent terms enriched in metabolites with high intensities in class 2.

(C) Fractions of labeled metabolites in glycolysis from [U-<sup>13</sup>C<sub>6</sub>] glucose in representative organoids of class 1 ( $n = 6$ ) and class 2 ( $n = 6$ ).

(D) Fractions of labeled metabolites in the TCA cycle from [U-<sup>13</sup>C<sub>6</sub>] glucose in representative organoids of class 1 ( $n = 6$ ) and class 2 ( $n = 6$ ).

(E and F) Fractions of labeled metabolites in oxidative PPP (E) and nonoxidative PPP (F) from [U-<sup>13</sup>C<sub>6</sub>] glucose in representative organoids of class 1 ( $n = 6$ ) and class 2 ( $n = 6$ ).

(G) Heatmap of widely targeted lipidomics assay showing the abundance of differentially lipid metabolites in class 1 ( $n = 6$ ) and class 2 ( $n = 6$ ).

(H and I) Class 1 ( $n = 13$ ) and class 2 ( $n = 15$ ) organoids were exposed to oligomycin, FCCP, and rotenone/antimycin A to measure the oxygen consumption rate (OCR) by XF Cell Mito Stress Test.

(J and K) Dose-response curves and normalized area under the curve (AUC) distribution for TVB-3166 (fatty acid synthase inhibitor) on class 1 and class 2.

(L and M) Dose-response curves and normalized AUC distribution for Gboxin (inhibitor of oxidative phosphorylation) on class 1 ( $n = 13$ ) and class 2 ( $n = 15$ ).

(N) Heatmap of RNA sequencing (RNA-seq) showing the expression of differentially expressed genes (DEGs) in glucomet-PDAC ( $n = 15$ ) and lipomet-PDAC ( $n = 13$ ) ( $p$  was calculated with limma,  $p < 0.05$  and fold change  $> 1.5$ ). Representative genes associated with lipid or glucose metabolism are shown in the box on the right.

(O) Profile plot and heatmap of assay for transposase-accessible chromatin with sequencing (ATAC-seq) results showing the distribution of differential peaks around the transcriptional start site (TSS) of signature genes in lipomet-PDAC ( $n = 13$ ) and glucomet-PDAC ( $n = 15$ ).

(P) KEGG pathways enriched in the lipomet subtype (left) and glucomet subtype (right) identified by GSEA.

The significance of the difference was determined by Student's *t* test ( $*p < 0.05$ ;  $**p < 0.01$ ) (B). Data are presented as the mean values  $\pm$  SEMs, and statistical significance was computed by unpaired Student's *t* test (C–F). Statistical significance was computed by unpaired Student's *t* test (I, K, and M).  $\alpha$ KG,  $\alpha$ -ketoglutarate; G6P, glucose-6-phosphate; 6PG, 6-phosphate gluconate; F6P, fructose-6-phosphate; R5P, ribose 5-phosphate; S7P, sedoheptulose-7-phosphate; E4P, erythrose 4-phosphate.

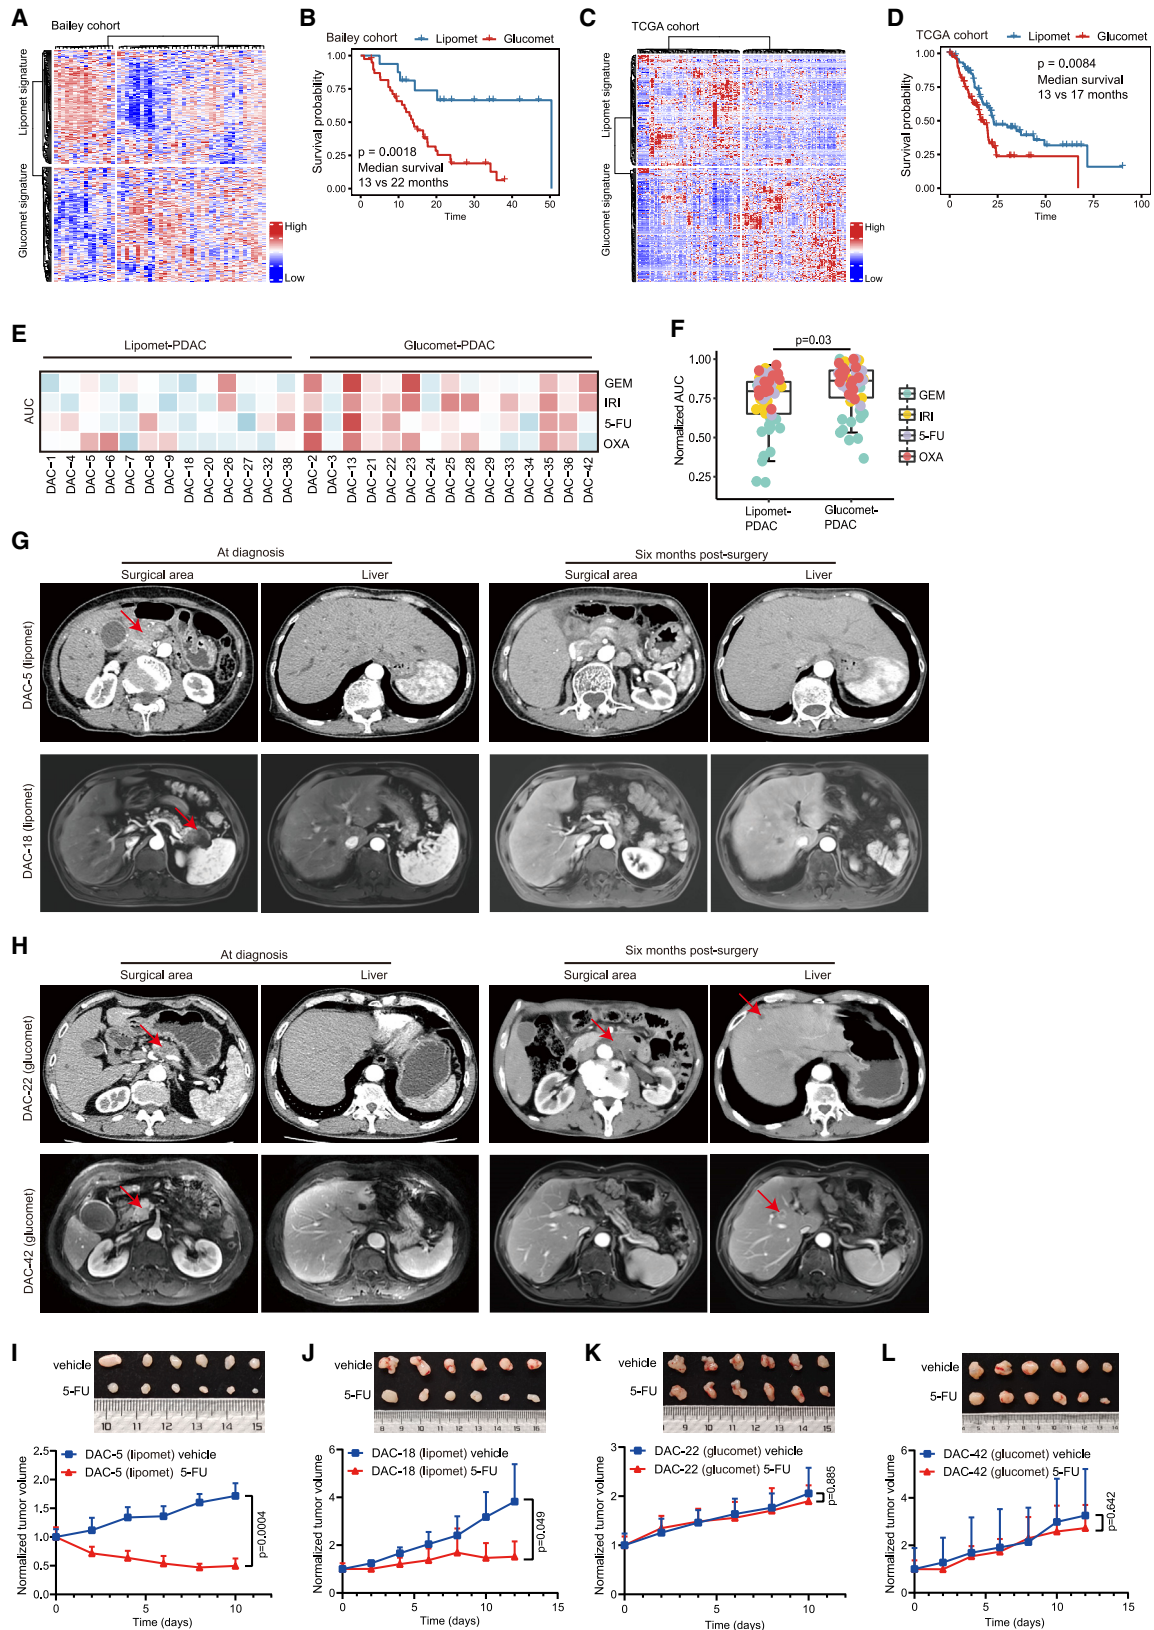

(legend on next page)

inhibitor (Figures 1J–1M). Therefore, these class 1 organoids were termed as lipomet-PDAC. These metabolic profiles classified PDAC into lipomet-PDAC and glucomet-PDAC with elevated lipid and glucose metabolism, respectively.

Abnormal accumulation of metabolites commonly results from the reprogramming of metabolic pathways.<sup>32</sup> To identify the molecular mechanism of PDAC metabolic reprogramming, we systematically analyzed the genomic and transcriptomic profiles. Surprisingly, glucomet-PDAC and lipomet-PDAC shared similar gene mutation profiles (Figures S1C–S1E). We next generated signatures of lipomet-PDAC and glucomet-PDAC based on RNA expression data (Figure 1N; Table S3) and identified the increased chromatin accessibility of signature genes in corresponding subtypes (Figure 1O). Consistent with the differences in metabolite levels, the expression of corresponding lipid metabolism- and glycan biosynthesis-associated genes was increased in lipomet-PDAC, and the expression of genes associated with glucose metabolism (the hypoxia inducible factor-1 [HIF-1] signaling pathway and central carbon metabolism in cancer) were increased in glucomet-PDAC (Figure 1P).

### Glucomet-PDAC is associated with worse prognosis and chemoresistance

We next investigated whether the metabolic subtypes were associated with clinical outcomes. In the absence of appropriate longitudinal data, the Bailey PDAC cohort (n = 55 patients) and the TCGA PDAC cohort (n = 156 patients) were classified into two subtypes based on the expression of metabolic signature genes.<sup>8,33</sup> Patients with glucomet-PDAC showed significantly worse overall survival than patients with lipomet-PDAC in the Bailey PDAC cohort and the TCGA PDAC cohort (Figures 2A–2D). As expected, cases identified as the basal subtype based on RNA data had a markedly worse prognosis than those identified as the classical subtype (Figures S1F and S1G). Strikingly, metabolic subtypes performed better than RNA subtypes in stratifying patients based on prognosis.

We further assessed the chemotherapy sensitivity of glucomet-PDAC and lipomet-PDAC using gemcitabine (GEM), 5-fluorouracil (5-FU), irinotecan (IRI), and oxaliplatin (OXA) (four chemotherapeutic drugs that work by inhibiting DNA synthesis), which are commonly used to treat patients with PDAC

(Figures S1H–S1K; Table S4). Therapeutic profiling revealed marked interpatient variability in the response to a single chemotherapy agent, but glucomet-PDAC organoids were generally more resistant to chemotherapeutic agents than lipomet-PDAC organoids (Figures 2E and 2F). To determine whether PDAC organoids can precisely reflect the chemosensitivity of patients, we obtained clinical follow-up data from four patients with PDAC with 5-FU as adjuvant therapy after surgery. Two patients with glucomet-PDAC (corresponding to two organoid lines: DAC-42 and DAC-22) relapsed 6 months after surgery, while the other two patients with lipomet-PDAC (corresponding to two organoid lines: DAC-5 and DAC-18) were disease free 6 months after surgery (Figures 2G and 2H). Glucomet-PDAC and lipomet-PDAC organoid-derived xenografts (ODXs) were used to evaluate chemosensitivity *in vivo*. 5-FU treatment significantly inhibited the growth of lipomet-PDAC ODXs but had no significant effects on 5-FU-resistant, glucomet-PDAC-derived xenografts (Figures 2I–2L). These findings suggest that glucomet-PDAC is chemoresistant and that it is associated with worse prognosis.

### The GLUT1/ALDOB/G6PD axis reprograms glucose metabolism in PDAC

Transcriptional differences within metabolic pathways could indicate the glucose reprogramming of PDAC. We noted that the expression of metabolic genes in glycolysis, the glucose transporter *GLUT1* (also known as *SLC2A1*) and the aldehyde dehydrogenase *ALDH1A3*, was upregulated in glucomet-PDAC compared with lipomet-PDAC. Intriguingly, the expression of the metabolic enzyme *ALDOB* in glycolysis was decreased in glucomet-PDAC compared with lipomet-PDAC (Figure 3A). *GLUT1*, which is a viable drug target and a predictor of worse prognosis,<sup>34,35</sup> is the main classical transporter for glucose uptake in tumors.<sup>36–39</sup> Cancer cells activate aerobic glycolysis and convert the majority of glucose into lactate.<sup>40</sup> As expected, lactate levels were positively correlated with *GLUT1* expression in PDAC organoids (Figure 3B). Furthermore, increased glucose uptake and lactate secretion were identified in glucomet-PDAC compared with lipomet-PDAC (Figure 3C). Although our PDAC organoid lines have the similar growth rates between glucomet-PDAC and lipomet-PDAC both *in vitro*

**Figure 2. Glucomet-PDAC is associated with worse prognosis and chemoresistance**

- (A) Heatmap of tumors in the Bailey PDAC cohort (n = 55, only squamous and pancreatic progenitor samples were included) split by glucomet and lipomet signature genes.
- (B) Kaplan-Meier survival curves of the Bailey PDAC cohort showing differential prognosis among patients with different subtypes.
- (C) Heatmap of tumors in the TCGA PDAC cohort (n = 156, only ductal pancreatic cancer samples were included) split by glucomet and lipomet signature genes.
- (D) Kaplan-Meier survival curves of the TCGA PDAC cohort showing differential prognosis among patients with different subtypes.
- (E) Normalized AUC distribution for GEM, 5-FU, OXA, and IRI on glucomet-PDAC (n = 15) and lipomet-PDAC (n = 13). The Z scores of the obtained normalized AUC values are depicted in the heatmap. High values (indicating resistance) are depicted in red, and low values (indicating sensitivity) are depicted in blue.
- (F) Comparison of AUCs of four agents among the two metabolic subtypes. The boxplot shows the median (central line) and the 25%–75% interquartile range (box limits).
- (G and H) Representative radiation examination of both the surgical area and liver in lipomet-PDAC (DAC-5 and DAC-18) and glucomet-PDAC (DAC-42 and DAC-22) at the time of diagnosis and 6 months postsurgery. The arrow marks the tumor position.
- (I–L) 5-FU responsiveness test in the indicated ODX models (n = 6 per group). Tumor volumes measured by calipers at the indicated time points in tumor-implanted mice subjected to treatments with control or 5-FU (25 mg/kg, every 2 days).
- Statistical significance was computed by log rank test (B and D). Significance was computed by a one-sided paired t test (F). Data are presented as the mean values ± SEMs, and statistical significance was computed by unpaired Student's t test (I–L). GEM, gemcitabine; 5-FU, 5-fluorouracil; IRI, irinotecan; OXA, oxaliplatin.

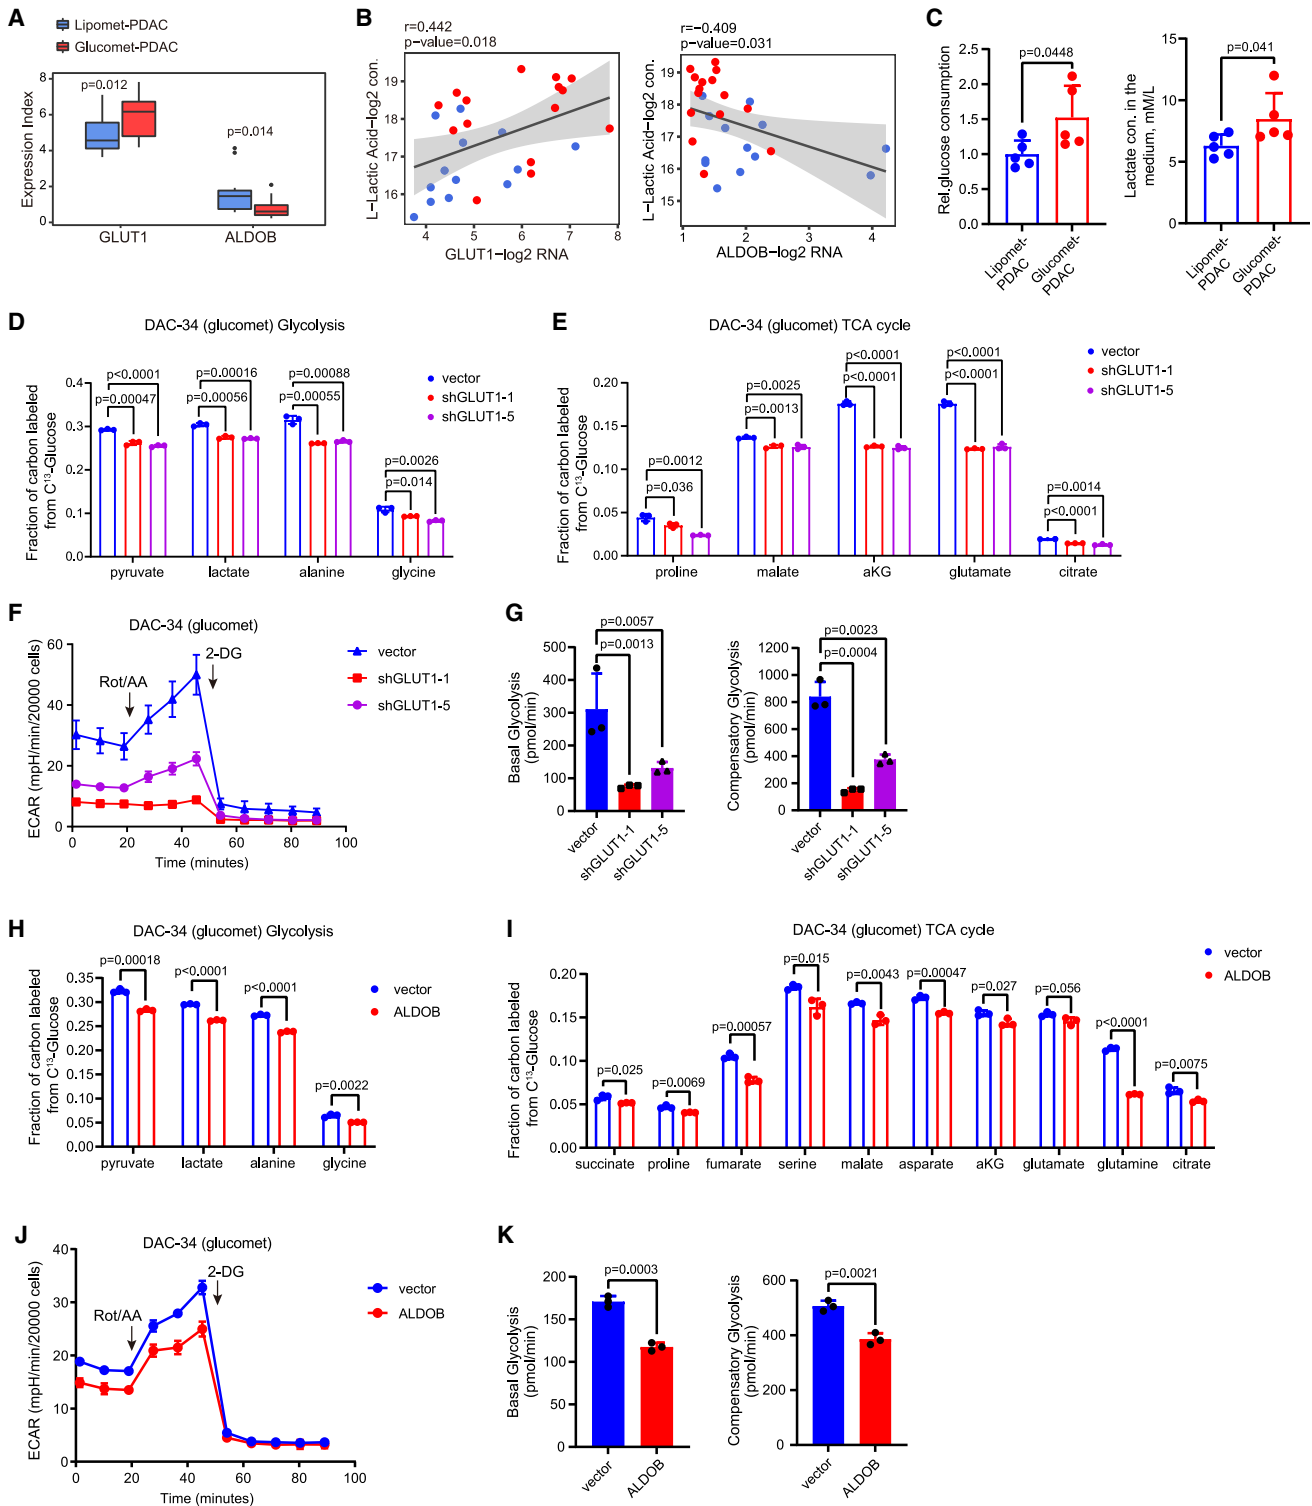

**Figure 3. The GLUT1 and ALDOB drives glucose metabolic reprogramming in glucomet-PDAC**

(A) Boxplot of *ALDOB* and *GLUT1* expression levels stratified by metabolic subgroup ( $p$  was calculated with limma).

(B) Scatterplot showing the correlation of lactate intensities and *GLUT1* or *ALDOB* gene expression (Pearson correlation analysis). Each dot represents an individual sample. Color represents the metabolic subgroup (red dot represents glucomet-PDAC, and blue dot represents lipomet-PDAC).

(C) Extracellular glucose consumption and lactate secretion were evaluated in representative organoids of glucomet-PDAC ( $n = 5$ ) and lipomet-PDAC ( $n = 5$ ).

(legend continued on next page)

and upon transplantation *in vivo* (Figures S2A and S2B), the promoting effect of glucose on organoid growth was significantly greater for glucomet-PDAC than for lipomet-PDAC (Figures S2C and S2D). We used [U-<sup>13</sup>C<sub>6</sub>] glucose to track metabolic flux in PDAC organoids and found that *GLUT1* knockdown significantly decreased the incorporation of [U-<sup>13</sup>C<sub>6</sub>] glucose into glycolysis and the TCA cycle (Figures 3D, 3E, and S2E–S2H). Consistently, in comparison with the control organoids, *GLUT1* knockdown organoids demonstrated a decreased extracellular acidification rate (ECAR) (Figures 3F, 3G, S2I, and S2J).

We applied metabolon-based energy metabolism analysis methods to further characterize differences in glucose metabolism between lipomet-PDAC and glucomet-PDAC. Four metabolites in the glycolytic pathway presented significantly higher intensities in glucomet-PDAC than in lipomet-PDAC. Increased levels of ALDOB upstream metabolites (G6P, F6P, and F1,6BP) and decreased *ALDOB* expression favored a model of glucose metabolic reprogramming in glucomet-PDAC with loss of *ALDOB* (Figures 3A and S2K). Moreover, *ALDOB* expression was negatively correlated with lactate levels (Figure 3B). We found that *ALDOB* overexpression significantly decreased the incorporation of [U-<sup>13</sup>C<sub>6</sub>] glucose into glycolysis and the TCA cycle (Figures 3H, 3I, S2L, and S2M). Consistently, *ALDOB* overexpression led to a significant decrease in basal glycolysis and compensatory glycolysis in glucomet-PDAC organoids (Figures 3J, 3K, S2N, and S2O).

Previously, we found that Aldob regulated glucose metabolism and suppressed hepatocellular carcinogenesis (HCC) by inhibiting G6PD activity through direct interaction.<sup>41</sup> Elevated oxidative PPP metabolite levels and G6PD enzyme activity were found in glucomet-PDAC (Figures 1E and 4A). *ALDOB* overexpression significantly inhibited G6PD enzyme activity and decreased oxidative PPP metabolite levels in glucomet-PDAC organoids (Figures 4B and 4C). Furthermore, *GLUT1* knockdown further suppressed the oxidative PPP pathway in glucomet-PDAC organoids under *ALDOB* overexpression conditions (Figures 4D and 4E). To determine whether *ALDOB* inhibits G6PD activity by direct interaction in PDAC organoids, the interaction between *ALDOB* and G6PD was investigated by immunoprecipitation analysis. We found that G6PD pulled down *ALDOB*, but not *ALDOA* or *ALDOC*, in two representative organoids (Figure 4F). These results indicate that low *ALDOB* expression is critical for the high oxidative PPP levels of glucomet-PDAC.

We expanded the analysis to 156 patients by a larger cohort from TCGA to validate our results. GSEA was performed using TCGA data from patients with PDAC based on *GLUT1* and *ALDOB* transcriptional levels. Fatty acid metabolism pathway genes were significantly enriched in the low *GLUT1*

with high *ALDOB* (*GLUT1*<sup>low</sup>/*ALDOB*<sup>high</sup>) expression group (Figure 4G). PPP metabolism and glycolysis pathway genes were enriched in the high *GLUT1* with low *ALDOB* (*GLUT1*<sup>high</sup>/*ALDOB*<sup>low</sup>) expression group (Figures 4H and 4I).

Then, we performed tissue microarray (TMA) analyses on patient samples (n = 283) with complete clinical data to assess the association between *GLUT1*/*ALDOB* protein expression and clinical outcomes. *GLUT1* or *ALDOB* protein expression scores were classified as low or high (Figure 4J; Table S5). In the Kaplan-Meier analysis, patients with *GLUT1*<sup>high</sup>/*ALDOB*<sup>low</sup> protein expression had the worst overall survival, whereas patients with *GLUT1*<sup>low</sup>/*ALDOB*<sup>low</sup> protein expression had the best overall survival (Figure 4K). These results indicated that patients with glucomet-PDAC (*GLUT1*<sup>high</sup>/*ALDOB*<sup>low</sup>) have a worse prognosis.

To confirm the potential of *GLUT1* and *ALDOB* as predictive biomarkers of therapeutic response at the RNA and protein levels, we analyzed the published PDAC cohort,<sup>42</sup> which has both RNA and protein expression results. We classified this PDAC cohort into two subtypes based on the RNA and protein expression of metabolic signature genes, respectively. As expected, a notable gene expression trend of *GLUT1*<sup>high</sup>/*ALDOB*<sup>low</sup> was identified in glucomet-PDAC based on RNA and protein expression levels (Figures S3A–S3D). Patients with glucomet-PDAC showed worse overall survival than patients with lipomet-PDAC in the cohort (Figures S3E and S3F). *GLUT1*<sup>high</sup>/*ALDOB*<sup>low</sup> patients also showed significantly worse overall survival in the cohort (Figures S3G and S3H). These results confirmed the value of the *GLUT1*/*ALDOB* axis as a biomarker of drug response and prognosis, and both protein and RNA could be applied to predict drug response.

These results suggest an essential role for the *GLUT1*/*ALDOB*/*G6PD* axis in regulating metabolic reprogramming, which enhances glucose entry into glycolysis, the TCA cycle, and the oxidative PPP in glucomet-PDAC (Figure 4L).

### GLUT1/*ALDOB*/*G6PD* axis-mediated chemoresistance by increasing pyrimidine nucleosides

Increased flux of glycolysis and the PPP leads to an increase in nucleoside biosynthesis, including the synthesis of pyrimidine and purine nucleosides, which serve as important inducers of drug resistance.<sup>2,12</sup> Widely targeted metabolomics analysis indicated that pyrimidine and purine pathway-related metabolites were enriched in glucomet-PDAC (Figure S4A). Increased levels of nucleosides and nucleoside derivatives were detected in glucomet-PDAC compared with lipomet-PDAC (Figure 5A). Furthermore, nucleoside and nucleoside derivative levels were correlated with high *GLUT1* expression and low *ALDOB* expression (Figure 5B).

(D and E) Fractions of labeled metabolites in glycolysis (D) and the TCA cycle (E) from [U-<sup>13</sup>C<sub>6</sub>] glucose in control and *GLUT1* knockdown organoids (n = 3 per group).

(F and G) Control and *GLUT1* knockdown organoids were exposed to rotenone/antimycin A and 2-DG to measure the ECAR at the basal level and compensatory level by the Seahorse XF Glycolytic Rate Assay (n = 3 per group).

(H and I) Fractions of labeled metabolites in glycolysis (H) and the TCA cycle (I) from [U-<sup>13</sup>C<sub>6</sub>] glucose in control and *ALDOB*-overexpressing organoids (n = 3 per group).

(J and K) Control and *ALDOB*-overexpressing organoids were exposed to rotenone/antimycin A and 2-DG to measure the ECAR at the basal level and compensatory level by the Seahorse XF Glycolytic Rate Assay (n = 3 per group).

(C–E, G–I, and K) Data are presented as mean values ± SEMs. Statistical significance was computed by unpaired Student's t test.



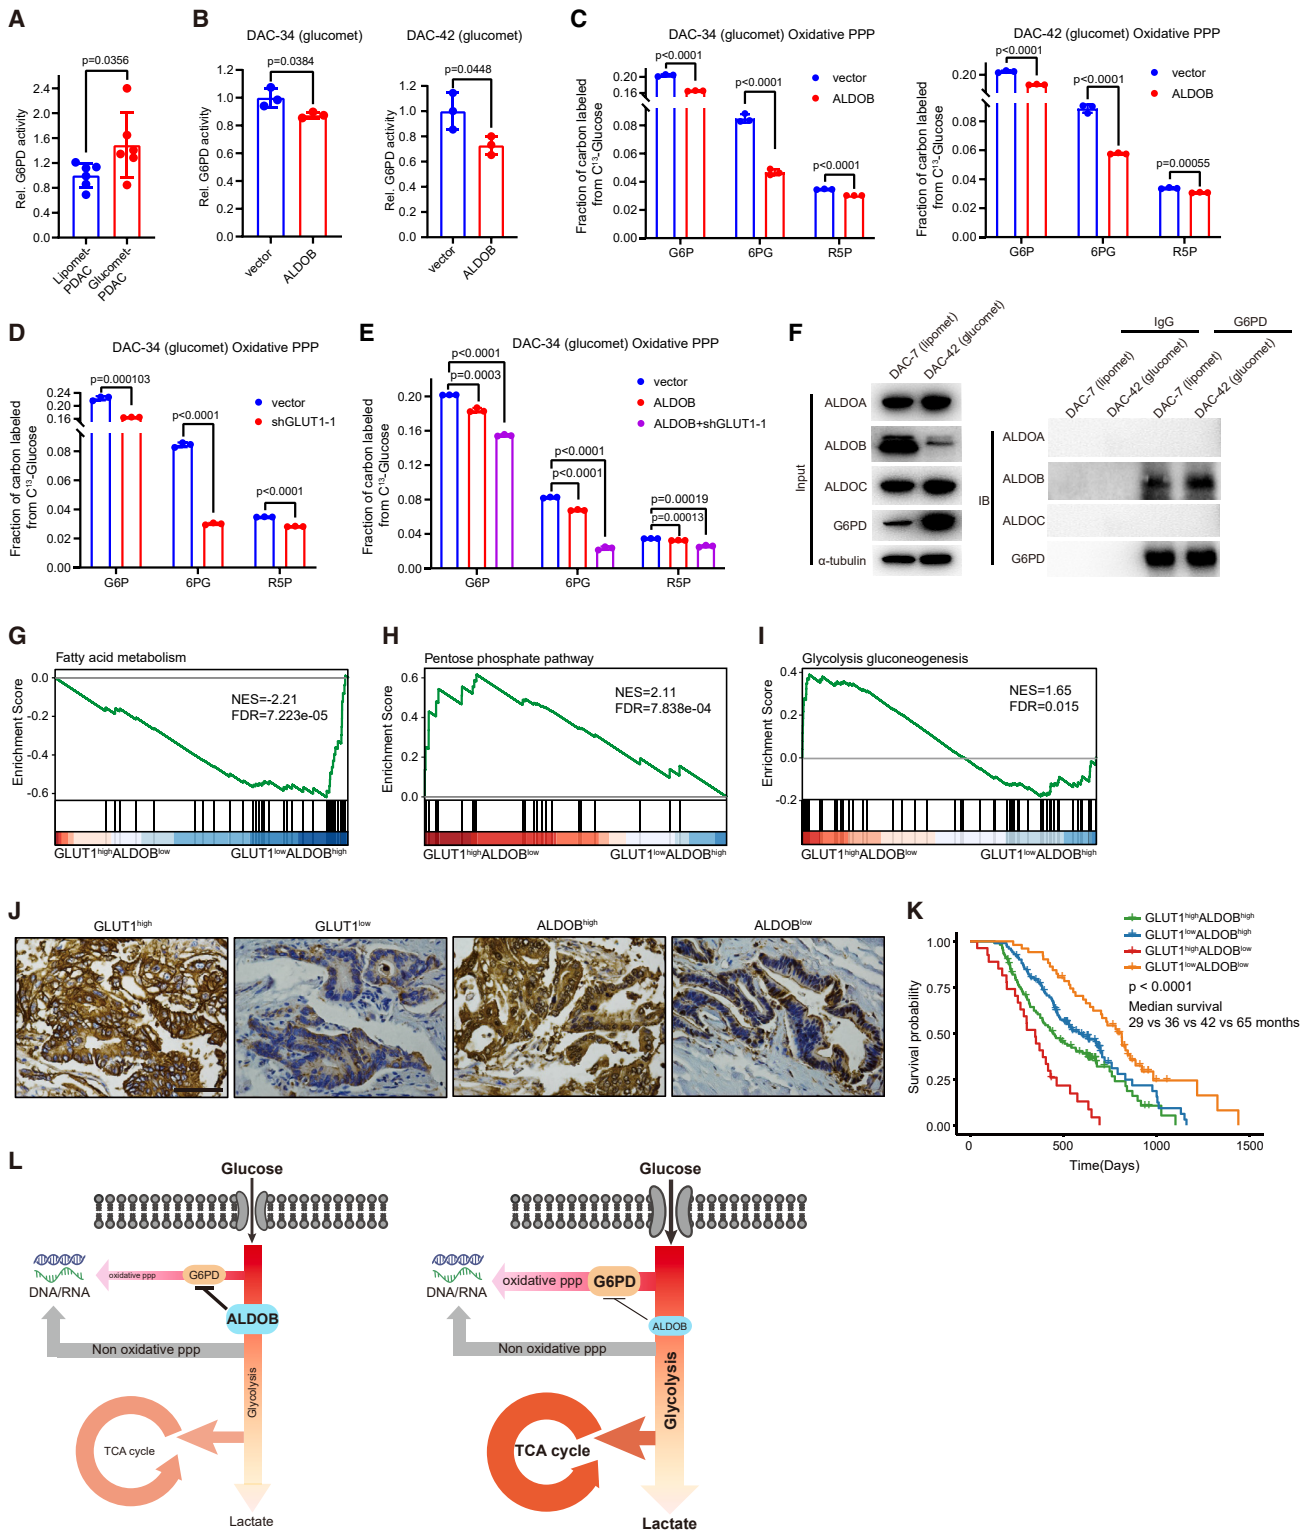

**Figure 4. The GLUT1/ALDOB/G6PD axis drives glucose metabolic reprogramming in gliucomet-PDAC**

(A) Relative G6PD enzyme activity in representative organoids of gliucomet-PDAC ( $n = 6$ ) and lipomet-PDAC ( $n = 6$ ).

(B) Relative G6PD enzyme activity in vector- and *ALDOB*-overexpressing organoids ( $n = 3$ ).

(C) Relative abundance of oxidative PPP metabolites in control and *ALDOB*-overexpressing organoids ( $n = 3$ ).

(legend continued on next page)

To further investigate how the increased flux of the oxidative PPP regulates drug sensitivity, we assessed several key PPP metabolites, R5P, pyrimidine nucleosides, and purine nucleosides, which could be taken up by organoids from the media. Activated G6PD and increased flux of oxidative PPP provide R5P for nucleotide biosynthesis. R5P is essential for DNA replication and DNA damage repair. R5P significantly enhanced 5-FU resistance in lipomet-PDAC organoids but had no effects on the 5-FU treatment response in glucomet-PDAC organoids (Figures S4B and S4C). Interestingly, exogenous addition of pyrimidine nucleosides, but not purine nucleosides, induced therapeutic resistance to GEM and 5-FU in lipomet-PDAC organoids but had no effects on glucomet-PDAC organoids (Figures 5C, 5D, and S4D–S4G). However, increased levels of pyrimidine nucleosides did not affect the sensitivity to nab-paclitaxel (PTX; acting on microtubules) in lipomet-PDAC and glucomet-PDAC (Figures 5E and 5F). These results showed that the increased flux of glucose into the pyrimidine nucleoside biosynthesis pathway led to chemotherapy resistance in glucomet-PDAC.

*GLUT1* knockdown, *ALDOB* overexpression, or *G6PD* knockdown distinctly increased the sensitivity to GEM, 5-FU, IRI, and OXA in glucomet-PDAC organoids (Figures 5G–5I and S5A–S5E). Moreover, *ALDOB* overexpression significantly increased the sensitivity to 5-FU in glucomet-PDAC *in vivo* (Figures 5J and S5F). However, expression changes in *GLUT1* or *ALDOB* did not affect the sensitivity to PTX in glucomet-PDAC organoids (Figures S5G–S5J).

The addition of exogenous pyrimidine nucleosides and R5P effectively rescued the increase in drug sensitivity induced by *GLUT1* knockdown, *ALDOB* overexpression, or *G6PD* knockdown in glucomet-PDAC cells (Figures 5K–5O and S5K–S5M). However, the addition of exogenous purine nucleosides had no effects on chemotherapy sensitivity in glucomet-PDAC organoids under *GLUT1* knockdown conditions (Figures 5P and 5Q). Furthermore, *ALDOB* knockdown distinctly induced chemotherapy resistance to 5-FU and GEM in lipomet-PDAC organoids (Figures S5N–S5P). The addition of exogenous pyrimidine nucleosides effectively decreased the chemosensitivity difference in lipomet-PDAC organoids between the *ALDOB* knockdown and control groups (Figures S5O and S5P). These results revealed that the *GLUT1*/*ALDOB*/*G6PD* axis mediated chemoresistance by modulating glucose metabolism and the levels of pyrimidine nucleosides in pancreatic cancer cells.

### Pharmacological inhibition of the *GLUT1*/*ALDOB*/*G6PD* axis enhances chemotherapeutic sensitivity

*GLUT1* knockdown significantly inhibited glucomet-PDAC-derived xenograft growth (Figure 6A). The *GLUT1* inhibitor BAY-876 decreased glucose uptake in both glucomet-PDAC organoids and lipomet-PDAC organoids (Figure 6B). BAY-876 increased the sensitivity to GEM in glucomet organoids but had no distinct effects on lipomet-PDAC organoids (Figure 6C). The addition of exogenous pyrimidine nucleosides effectively decreased the sensitivity to GEM and 5-FU in glucomet-PDAC organoids under the condition of *GLUT1* inhibition by BAY-876 (Figures S6A and S6B). These results indicate that clinical-grade inhibitors of *GLUT1* have the potential to enhance the chemotherapy response of PDAC.

G6PD plays an essential role in regulating the oxidative PPP pathway and nucleotide biosynthesis.<sup>43</sup> We next examined the therapeutic potential of the G6PD inhibitor 6AN in promoting chemotherapy sensitivity. 6AN treatment attenuated G6PD activity but had no effect on cell viability in glucomet-PDAC and lipomet-PDAC organoids (Figures 6D and S6C). Furthermore, 6AN increased the sensitivity to 5-FU and GEM in glucomet-PDAC organoids but had no effects on lipomet-PDAC organoids (Figures 6E and S6D–S6F). 6AN and 5-FU combination significantly reduced tumor growth in chemoresistant glucomet-PDAC ODXs but seriously affected mice body weight (Figures 6F, 6G, and S6G). Considering the physiological toxicity of 6AN, we performed virtual screening of 5 compound libraries (7,098 compounds) to find candidate inhibitors of G6PD. Forty compounds were chosen as G6PD candidate inhibitors, and most of them were clinical-grade inhibitors. Among these 40 compounds, 38 were excluded based on their low inhibition rates (Figure 6H). Although the binding site of the remaining two compounds (MLN8054 and 666-15) on G6PD was the same as that of 6AN (Figures 6I and S6H), only MLN8054 significantly inhibited G6PD activity (Figures 6J and S6I). MLN8054 increased the sensitivity to 5-FU in glucomet-PDAC organoids *in vitro* (Figures 6K and S6J). To further determine the effects of MLN8054 on tumor growth *in vivo*, glucomet-PDAC DAC-42 ODXs were subjected to vehicle, 5-FU, MLN8054, or combined treatment. Without affecting body weight, combined treatment significantly suppressed tumor growth compared with vehicle or individual agent treatment (Figures 6L, 6M, and S6K). However, combined treatment did not affect the sensitivity to 5-FU in

(D and E) Relative abundance of oxidative PPP metabolites in control, *GLUT1* knockdown, *ALDOB* overexpression, *GLUT1* knockdown, and *ALDOB* overexpression organoids (n = 3).

(F) Endogenous *ALDOB* and G6PD interactions in PDAC organoids detected by immunoprecipitation (IP) experiments.

(G–I) TCGA patients with PDAC (n = 156) were divided into *GLUT1*<sup>high</sup>/*ALDOB*<sup>low</sup>, *GLUT1*<sup>low</sup>/*ALDOB*<sup>high</sup>, and others based on *GLUT1* and *ALDOB* expression levels. Samples with expression of *GLUT1* in the top 40% and expression of *ALDOB* in the last 40% were named *GLUT1*<sup>high</sup>/*ALDOB*<sup>low</sup>, while samples with expression of *ALDOB* in the top 40% and expression of *GLUT1* in the last 40% were named *GLUT1*<sup>low</sup>/*ALDOB*<sup>high</sup>. GSEA enrichment plot for *GLUT1*<sup>high</sup>/*ALDOB*<sup>low</sup> group versus *GLUT1*<sup>low</sup>/*ALDOB*<sup>high</sup> group of fatty acid metabolism (G), pentose phosphate pathway (H), and glycolysis/gluconeogenesis (I) signature genes.

(J) Representative images of immunohistochemical staining show high or low *GLUT1* staining and high or low *ALDOB* staining in PDAC TMA (n = 285). Scale bar, 50 μm. Patients were divided into four groups based on *ALDOB* and *GLUT1* expression levels: *ALDOB*<sup>high</sup> (++) , *ALDOB* expression >50%; *ALDOB*<sup>low</sup> (+) , *ALDOB* expression <50%; *GLUT1*<sup>high</sup> (++) , *GLUT1* expression >50%; and *GLUT1*<sup>low</sup> (+) , *GLUT1* expression <50%.

(K) Kaplan-Meier survival curves based on the expression of *GLUT1* and *ALDOB* in 285 patients with PDAC.

(L) Summary scheme highlighting the roles of the *GLUT1*/*ALDOB*/*G6PD* axis in glucose reprogramming.

Data are presented as the mean values ± SEMs, and statistical significance was computed by unpaired Student's t test (A–E). Statistical significance was computed by log-rank test (K).

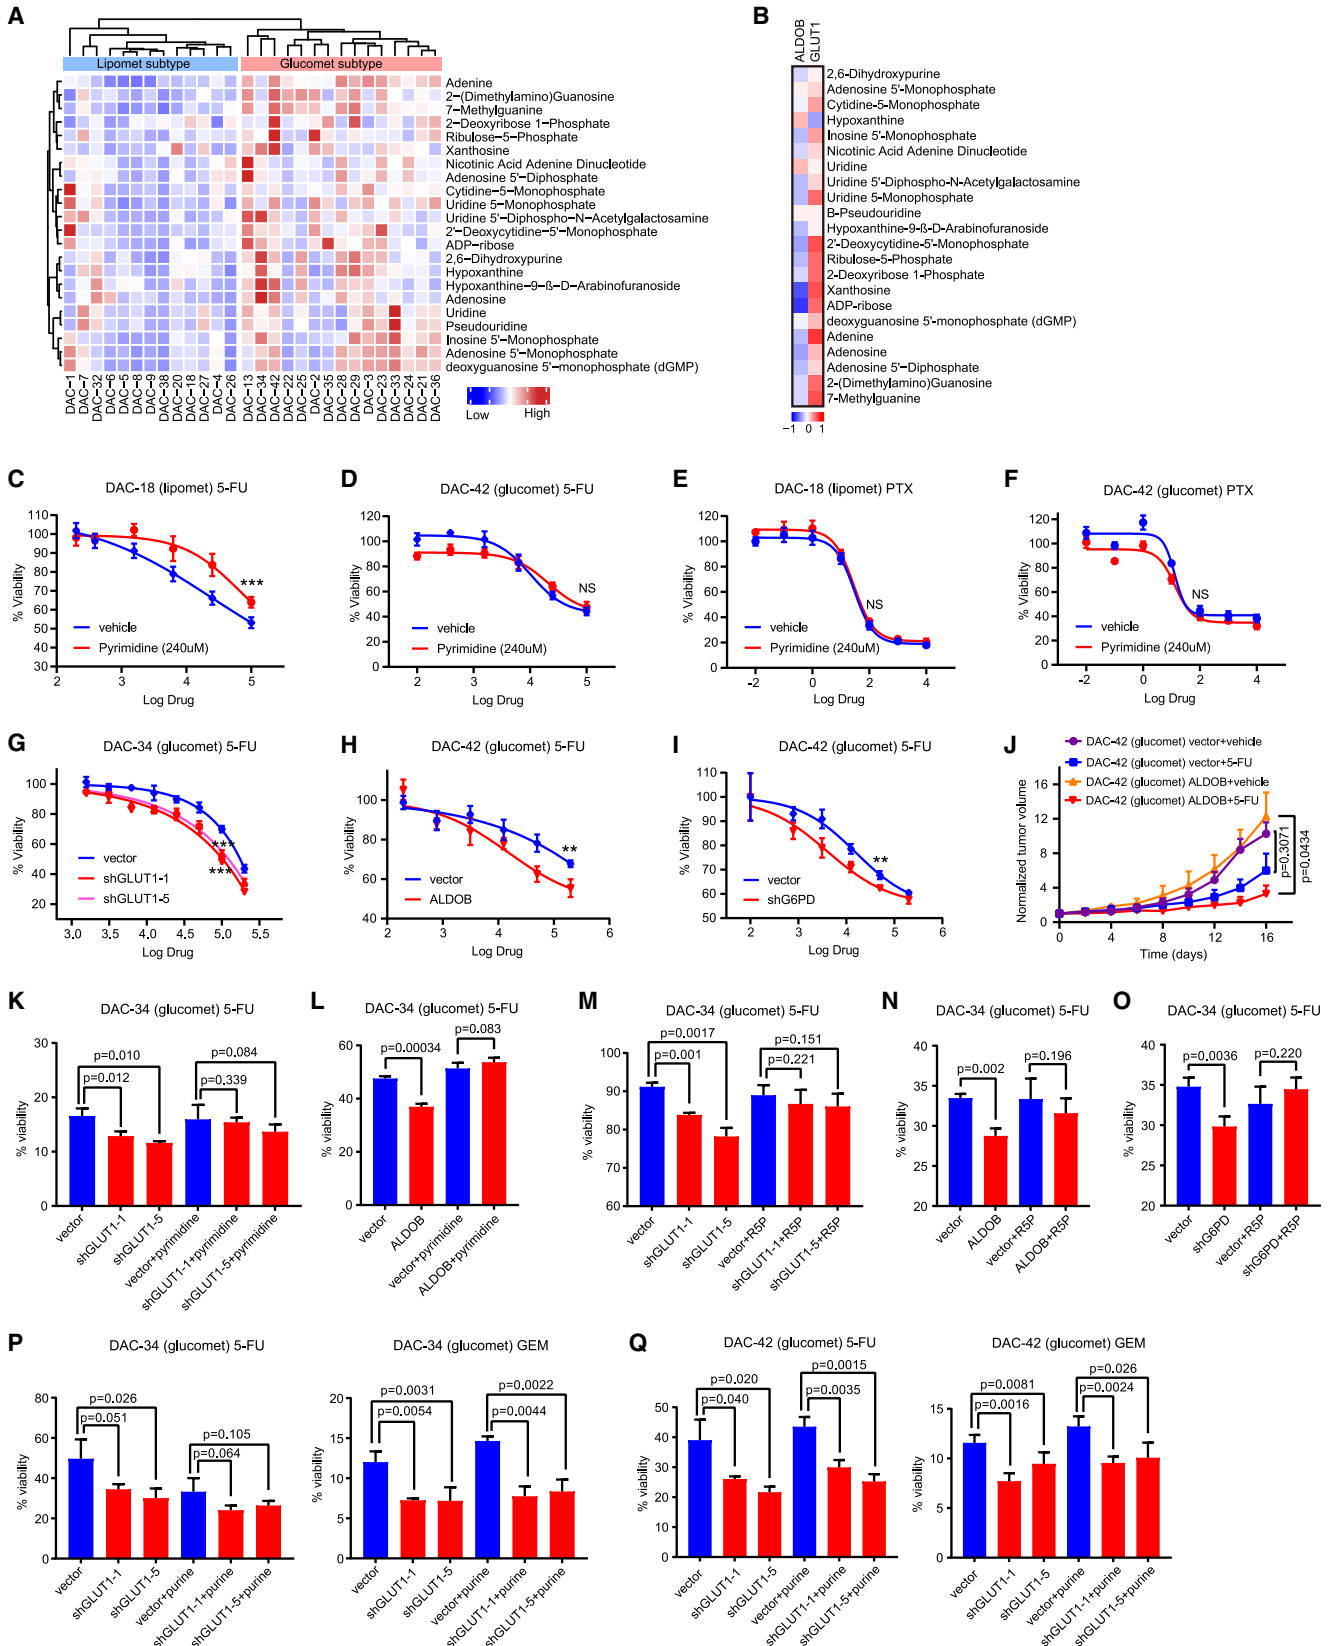

(legend on next page)

lipomet-PDAC organoids (Figures 6N, 6O, and S6L). MLN8054 and alisertib (a MLN8054 analog) have been reported as orally active small molecules that selectively inhibit Aurora A kinase and that have advanced into human clinical trials.<sup>44–46</sup> Treatment with alisertib showed similar results to MLN8054 treatment (Figures 6J–6M). Our study discovered two clinical-grade G6PD inhibitors that significantly enhanced the chemotherapy response of PDAC.

These results indicate that targeting the GLUT1/ALDOB/G6PD axis in combination with chemotherapy has the potential to increase therapy response and survival in patients with PDAC.

## DISCUSSION

Although chemotherapies significantly prolong survival of patients with PDAC patient, the chemotherapy response rates of PDAC remain poor.<sup>2,47</sup> An effective classification strategy to divide patients into sensitive and resistance groups is urgently needed. Here, we classified patients with PDAC into glucomet-PDAC and lipomet-PDAC groups based on metabolomic profiles, identified glucomet-PDAC as a chemoresistant group, and developed a potential pharmacological strategy that involves inhibiting the GLUT1/ALDOB/G6PD axis to enhance the chemotherapy sensitivity of glucomet-PDAC.

There is increasing recognition of metabolic reprogramming as an emerging mechanism of cancer therapy resistance, but it remains poorly characterized in PDAC.<sup>16,17,48</sup> Patient-derived PDAC tumor specimens usually contain an abundant stroma intermixed with normal pancreatic cells, which affects the sensitivity to characterize the PDAC cancer cells.<sup>49</sup> Patient-derived cancer organoid models faithfully recapitulate the characteristics of the original tumor cells and are attractive candidates to investigate the metabolic reprogramming of PDAC.<sup>25,26,50</sup> Patient-derived PDAC organoids include both basal-like and classical PDAC subtypes.<sup>27–31</sup> Moreover, metabolic profiling of early and late recurrent PDAC using patient-derived organoids provides insight into PDAC recurrence from a metabolic perspective.<sup>51</sup> Here, we successfully identified metabolic subtypes by profiling patient-derived PDAC organoids and

classified them into glucomet-PDAC and lipomet-PDAC. Glucomet-PDAC organoids were resistant to chemotherapy by remodeling glucose metabolism. Importantly, the glucomet-PDAC gene expression signature GLUT1<sup>high</sup>/ALDOB<sup>low</sup> could efficiently identify patients with the best overall survival and the worst overall survival. Our study provides an example of metabolic reprogramming as a chemotherapy resistance mechanism in PDAC and identifies markers for predicting the chemotherapy response.

Multiple molecular mechanisms of PDAC chemoresistance have been suggested,<sup>2,52–54</sup> related to drug transport and drug metabolism. hENT1 and GATA6 expression has been associated with GEM and 5-FU sensitivity.<sup>55,56</sup> However, there is no significant correlation between these two genes' expression with GEM and 5-FU sensitivity in our cohort. Consistently, previous study has demonstrated that hENT1 expression is not reduced in some GEM-resistant PDAC cell lines.<sup>57</sup> These results suggest that hENT1 expression alone may not be sufficient to predict GEM sensitivity. Increased glycolytic flux has been identified as a widely prevalent mechanism of resistance to GEM in pancreatic cancer.<sup>12</sup> HIF-1 $\alpha$ -mediated metabolic reprogramming enhanced the intrinsic levels of deoxycytidine triphosphate (dCTP).<sup>12</sup> Here, we presented a mechanism of chemoresistance by remodeling glucose metabolism in glucomet-PDAC through the GLUT1/ALDOB/G6PD axis. High GLUT1-induced glucose uptake not only feeds into the glycolysis pathway but also feeds into intermediate pathways to generate biomass. Downregulation of ALDOB in glucomet-PDAC released inhibition on G6PD and oxidative PPP, resulting in increased PPP flux to meet bioenergetic and biosynthetic demands. This new metabolic rerouting strategy enables glucomet-PDAC organoids to expand intracellular pyrimidine pools that can in turn render chemotherapy ineffective by molecular competition (Figure S6M). Consistently, therapies targeting the GLUT1/ALDOB/G6PD axis are only effective when combined with chemotherapeutic agents that act on DNA synthesis.

Glucose metabolism reprogramming in cancer cells is required to fulfill anabolic demands, which provide therapeutic targets.<sup>11,58</sup> Targeted inhibition of the GLUT1/ALDOB/G6PD

### Figure 5. The GLUT1/ALDOB/G6PD axis contributes to drug resistance

- (A) Heatmap showing the relative abundance of nucleoside and nucleoside derivatives in glucomet-PDAC (n = 15) and lipomet-PDAC (n = 13).  
 (B) Heatmap showing Pearson correlation coefficients between the RNA expression levels of *ALDOB/GLUT1* and nucleoside derivatives.  
 (C and D) DAC-18 (lipomet) and DAC-42 (glucomet) organoids were treated with 5-FU alone or in combination with pyrimidine nucleosides (uridine, cytidine, and thymidine, 240  $\mu$ M) for 5 days, and cell viability was determined by CellTiter-Glo assays.  
 (E and F) DAC-18 (lipomet) and DAC-42 (glucomet) organoids were treated with PTX alone or in combination with pyrimidine nucleosides (240  $\mu$ M) for 5 days, and cell viability was determined by CellTiter-Glo assays.  
 (G) Effect of *GLUT1* knockdown on 5-FU responsiveness of DAC-34 (glucomet) as determined by CellTiter-Glo assays 120 h after treatment with 5-FU.  
 (H) Effect of *ALDOB* overexpression on the 5-FU responsiveness of DAC-42 (glucomet) as determined by CellTiter-Glo assays 120 h after treatment with 5-FU.  
 (I) Effect of *G6PD* knockdown on the 5-FU responsiveness of DAC-42 (glucomet) as determined by CellTiter-Glo assays 120 h after treatment with 5-FU.  
 (J) Effect of *ALDOB* overexpression on 5-FU responsiveness in the DAC-42 (glucomet) ODX model (n = 6 per group).  
 (K) Effect of pyrimidine nucleotide (240  $\mu$ M) on 5-FU sensitivity in control and *GLUT1* knockdown organoids by CellTiter-Glo assays at 120 h posttreatment.  
 (L) Effect of pyrimidine nucleotide (240  $\mu$ M) on 5-FU sensitivity in control and *ALDOB* overexpression organoids by CellTiter-Glo assays at 120 h posttreatment.  
 (M) Effect of R5P (1 mM) on 5-FU sensitivity in control and *GLUT1* knockdown organoids by CellTiter-Glo assays at 120 h posttreatment.  
 (N) Effect of R5P (1 mM) on 5-FU sensitivity in control and *ALDOB*-overexpressing organoids by CellTiter-Glo assays at 120 h posttreatment.  
 (O) Effect of R5P (1 mM) on 5-FU sensitivity in control and *G6PD* knockdown organoids by CellTiter-Glo assays at 120 h posttreatment.  
 (P and Q) Effect of purine nucleotides (guanosine and adenosine, 200  $\mu$ M) on 5-FU and GEM sensitivity in control and *GLUT1* knockdown organoids by CellTiter-Glo assays at 120 h posttreatment.

All dose-responsive curves were performed with 3 technical replicates. Data are presented as the mean values  $\pm$  SEMs, and statistical significance was computed by unpaired Student's t test (\*p < 0.05; \*\*p < 0.01; \*\*\*p < 0.001) (C–Q).

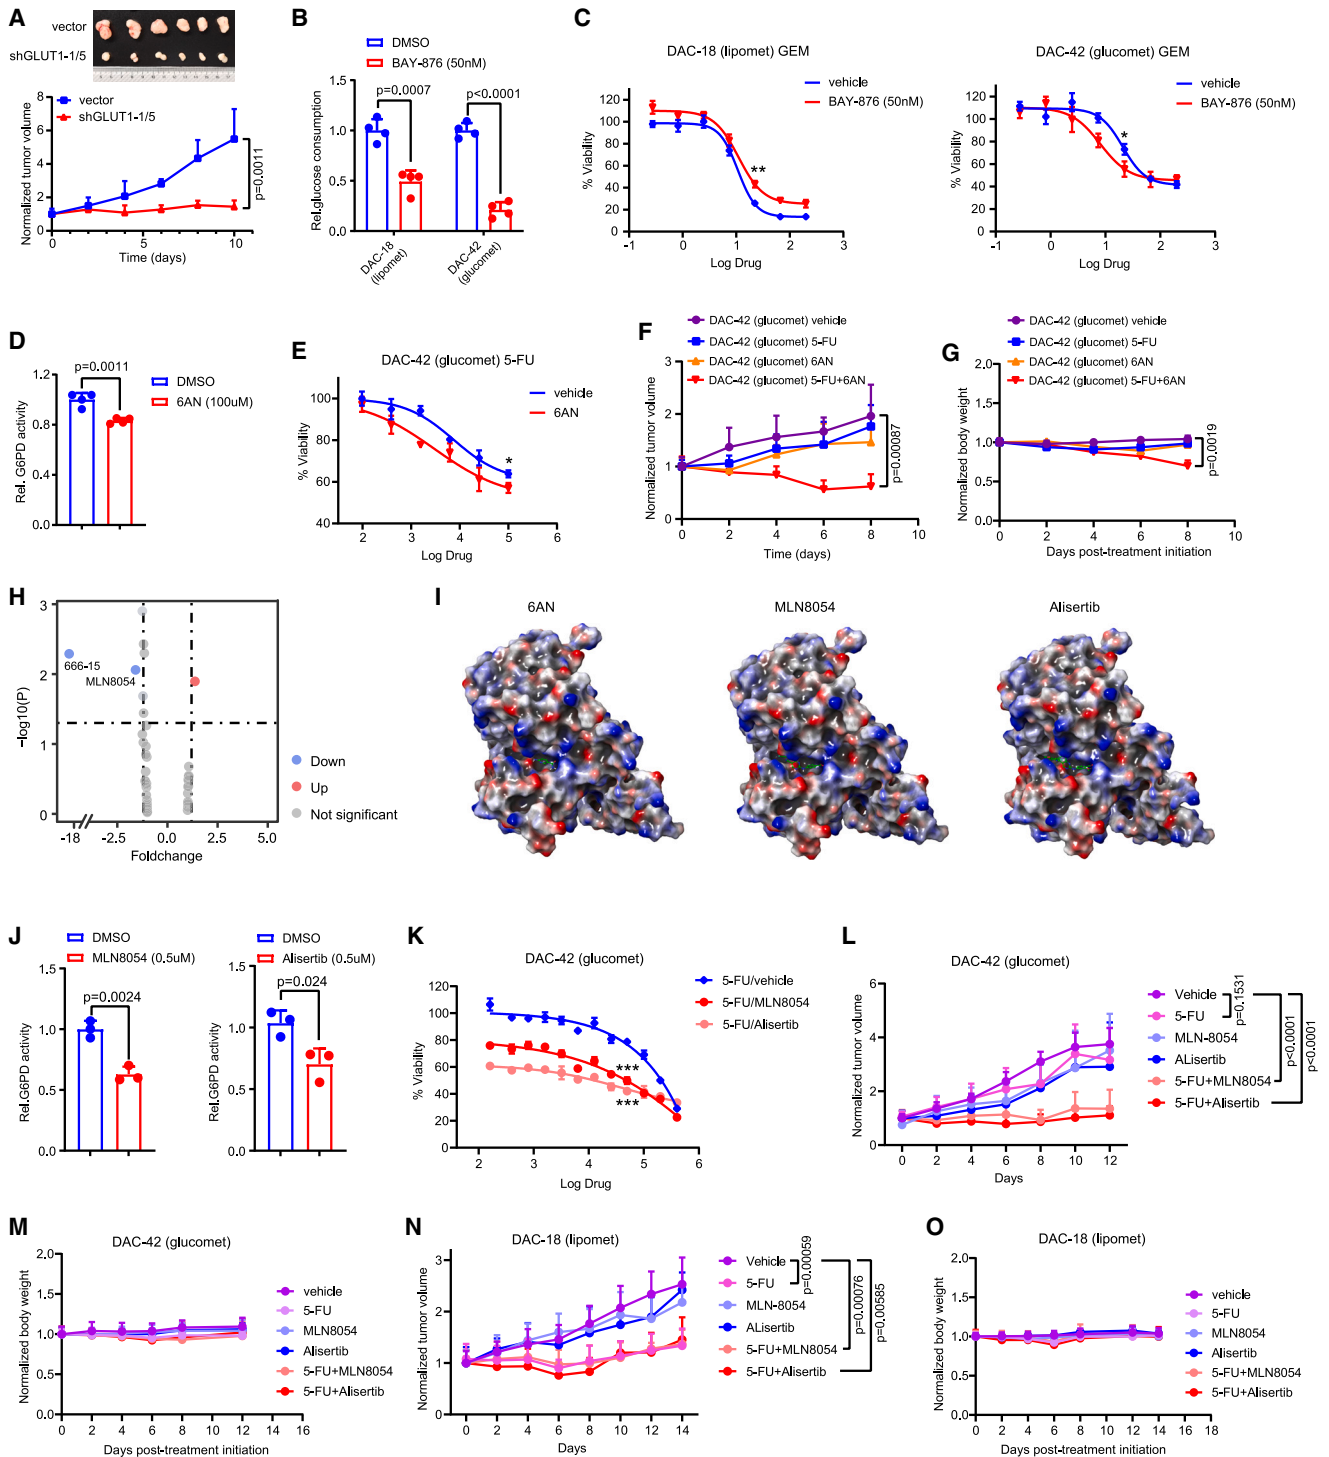

**Figure 6. Pharmacological inhibition of GLUT1 or G6PD enhances chemotherapy sensitivity**

(A) *GLUT1* knockdown suppresses tumorigenesis in a DAC-42 ODX model (n = 6 per group).

(B) The effect of the GLUT1 inhibitor BAY-876 (50 nM) on extracellular glucose consumption in DAC-18 (lipomet) and DAC-42 (glucomet) organoids was evaluated (n = 4).

(C) Effect of BAY-876 (50 nM) on the GEM responsiveness of DAC-42 (glucomet) and DAC-18 (lipomet) as determined by CellTiter-Glo assays 120 h after treatment with GEM.

(D) The effect of 6AN on G6PD activity in DAC-42 (glucomet) organoids was evaluated (n = 4).

(legend continued on next page)

axis in combination with chemotherapy significantly increased the therapeutic response of glucomet-PDAC. GLUT1, which has a high affinity for glucose, is overexpressed in many cancers.<sup>36–39</sup> Our study and previous studies have demonstrated that the high expression level of GLUT1 correlated with chemotherapy resistance in pancreatic tumor cells.<sup>12</sup> Several small molecules that inhibit GLUT1 have been shown to selectively kill cancer cells *in vitro*.<sup>59,60</sup> In our study, genetic knock-down of *GLUT1* or chemical inhibition of GLUT1 activity suppressed cell viability and tumor progression both *in vitro* and *in vivo*. However, the widespread expression of *GLUT1* in different types of normal mammalian cells may preclude the clinical use of these inhibitors.<sup>61–63</sup> The roles of G6PD and PPP have been increasingly recognized in various cancers, and G6PD upregulation is correlated with poor prognosis.<sup>64–68</sup> G6PD inhibition significantly increased the therapeutic response to chemotherapy in glucomet-PDAC. The genetic defect of *GLUT1* or *G6PD* causes a spectrum of diseases, but the vast majority of persons with *G6PD* deficiency also may be asymptomatic.<sup>69,70</sup> Therefore, clinical-grade G6PD inhibitors may have the potential to improve the PDAC treatment response.

Overall, our study provides a new PDAC classification strategy based on metabolic profiles and reports that the GLUT1/ALDOB/G6PD axis induces chemoresistance by remodeling glucose metabolism in glucomet-PDAC. These results provide a strong rationale for future drug development and clinical trials designed to target the GLUT1/ALDOB/G6PD axis to overcome metabolic reprogramming-driven chemotherapy resistance.

### Limitations of the study

PDAC organoids offer a pure cancer cell population for investigating the molecular mechanism of chemotherapy resistance; however, chemotherapy resistance is multifactorial, which also includes the cells of tumor microenvironment. Therefore, a more comprehensive chemotherapy resistance mechanism from cancer cell and microenvironment interaction may be essential in the future. Our study identified the core glucose metabolic alterations that mediate chemotherapy resistance in intrinsically resistant PDAC organoids. Whether these metabolic alterations also contribute to acquired chemotherapy resistance still needs to be identified. In addition,

we report the potential role of MLN8054 and alisertib in inhibiting G6PD activity and increasing sensitivity of PDAC organoids. However, whether these two inhibitors really benefit patients with PDAC clinically needs more clinic studies in the future.

### STAR★METHODS

Detailed methods are provided in the online version of this paper and include the following:

- KEY RESOURCES TABLE
- RESOURCE AVAILABILITY
  - Lead contact
  - Materials availability
  - Data and code availability
- EXPERIMENTAL MODEL AND STUDY PARTICIPANT DETAILS
  - Human subjects ethics statement
  - Organoid culture
  - Mouse studies
- METHOD DETAILS
  - Widely targeted metabolomics assay
  - Widely targeted lipidomics assay
  - Metabolon-based energy metabolism detection
  - Metabolic flux experiments using [U-<sup>13</sup>C<sub>6</sub>] glucose
  - Measurement of labeled metabolites of isotopomers by GC-MS, LC-MS and UHPLC-QTOF system
  - Measurement of G6PD enzymatic activity
  - Immunoprecipitation and immunoblotting
  - Drug-treatment assays
  - Immunohistochemistry
  - qRT-PCR
  - Metabolomics-based subtyping
  - ATAC-data processing
  - Crystal structure of G6PD and substrate
- QUANTIFICATION AND STATISTICAL ANALYSIS

### SUPPLEMENTAL INFORMATION

Supplemental information can be found online at <https://doi.org/10.1016/j.xcrm.2023.101162>.

(E) Effect of 6AN treatment on the 5-FU responsiveness of DAC-42 (glucomet) organoids as determined by CellTiter-Glo assays 120 h after treatment with 5-FU.  
 (F) Effect of 6AN on 5-FU responsiveness in the ODX model. Tumor volumes measured by calipers at the indicated time points in tumor-implanted mice subjected to treatments with vehicle, 5-FU alone (25 mg/kg, every 2 days), 6AN alone (5 mg/kg, every 2 days), or 5-FU with 6AN.  
 (G) Normalized body weights of SCID mice with the indicated treatments.  
 (H) Volcano plot showing the effect of 40 compounds on the 5-FU responsiveness of DAC-34 (glucomet) as determined by CellTiter-Glo assays 120 h after treatment with compounds (5 μM), 5-FU (100 μM), or both.  
 (I) Prediction of the potential interaction sites in the 3D structure of the G6PD protein with 6AN, MLN8054, and alisertib.  
 (J) Effect of MLN8054 and alisertib on G6PD activity in DAC-42 (glucomet) organoids.  
 (K) Effect of MLN8054 or alisertib treatment on the 5-FU responsiveness of DAC-42 (glucomet) as determined by CellTiter-Glo assays 120 h after treatment with the indicated drugs.  
 (L) Tumor volume of DAC-42 ODXs (n = 6 per group) in SCID mice following treatment with the indicated drugs.  
 (M) Normalized body weights of SCID mice (n = 3 per group) with the indicated treatments.  
 (N) Tumor volume of DAC-18 ODXs (n = 6 per group) in SCID mice following treatment with the indicated drugs.  
 (O) Normalized body weights of SCID mice (n = 3 per group) with the indicated treatments.  
 All dose-responsive curves were performed with 3 technical replicates. Data are presented as the mean values ± SEMs, and statistical significance was computed by unpaired Student's t test (\*p < 0.05; \*\*p < 0.01; \*\*\*p < 0.001) (A–G and J–O).

## ACKNOWLEDGMENTS

We thank Junke Zheng (Shanghai Jiao Tong University) for giving us constructive suggestion about this work. We also thank Zhuo Yang, Meng Zhao, Yaqin Yan, and Ming Chen for providing technical help at the SIBCB Core Facility. This study was supported by grants from the National Key Research and Development Program of China (nos. 2020YFA0509000, 2022YFA1004800, 2018YFA0800301, 2022YFC2503303); the Basic Frontier Science Research Program of the Chinese Academy of Sciences (no. ZDBS-LY-SM015); the National Natural Science Foundation of China (nos. 32125013, 81830054, 92253304, 32030053, 32150710522, 12131020, 31930022, 82172589, 82172712, 32241017, 92157108, T2341007, and T2350003); Shanghai Municipal Science and Technology Major Project; the Shanghai Science and Technology Committee (nos. 21XD1424200, 21ZR1470100, 20ZR1456500, and 20511101200); the Chinese Academy of Sciences (nos. GJHZ201968 and JCTD-2020-17); the Shanghai ShenKang Hospital Development Center (no. SHDC2020CR2001A); the Special Fund for Science and Technology Innovation Strategy of Guangdong Province (nos. 2021B0909050004 and 2021B0909060002); JST Moonshot R&D (no. JPMJMS2021); the Shanghai ShenKang Hospital development center (no. SHDC2020CR2001A); the CAS Project for Young Scientists in Basic Research (no. YSBR-014); the Innovative Research Team of High-level Local Universities in Shanghai (SHSMU-ZLXC20212302); Naval Medical University (no. 2022QN045); and the City University of Hong Kong (no. 9380154).

## AUTHOR CONTRIBUTIONS

D.G., G.J., H.Y., and W.Y. conceived and designed the experimental approach. Y.L., X.S., J.L., X.W., and Yehan Zhang performed most experiments. S.T. and L.C. contributed to the computational analysis and statistical analysis. H.W., J.H., Y. Zhu, Y.J., Yajuan Zhang, and S.G. helped with the experiments and provided technical support. Y.L., S.T., G.J., and D.G. prepared the manuscript as senior authors.

## DECLARATION OF INTERESTS

The authors declare no competing interests.

## INCLUSION AND DIVERSITY

We support inclusive, diverse, and equitable conduct of research.

Received: January 3, 2023

Revised: June 14, 2023

Accepted: July 26, 2023

Published: August 18, 2023

## REFERENCES

- Siegel, R.L., Miller, K.D., Fuchs, H.E., and Jemal, A. (2022). Cancer statistics, 2022. *CA A Cancer J. Clin.* 72, 7–33. <https://doi.org/10.3322/caac.21708>.
- Zeng, S., Pöttler, M., Lan, B., Grützmann, R., Pilarsky, C., and Yang, H. (2019). Chemoresistance in Pancreatic Cancer. *Int. J. Mol. Sci.* 20, 4504. <https://doi.org/10.3390/ijms20184504>.
- Conroy, T., Desseigne, F., Ychou, M., Bouché, O., Guimbaud, R., Bécouarn, Y., Adenis, A., Raoul, J.L., Gourgou-Bourgade, S., de la Fouchardière, C., et al. (2011). FOLFIRINOX versus gemcitabine for metastatic pancreatic cancer. *N. Engl. J. Med.* 364, 1817–1825. <https://doi.org/10.1056/NEJMoa1011923>.
- Von Hoff, D.D., Ervin, T., Arena, F.P., Chiorean, E.G., Infante, J., Moore, M., Seay, T., Tjulandin, S.A., Ma, W.W., Saleh, M.N., et al. (2013). Increased survival in pancreatic cancer with nab-paclitaxel plus gemcitabine. *N. Engl. J. Med.* 369, 1691–1703. <https://doi.org/10.1056/NEJMoa1304369>.
- Collisson, E.A., Bailey, P., Chang, D.K., and Biankin, A.V. (2019). Molecular subtypes of pancreatic cancer. *Nat. Rev. Gastroenterol. Hepatol.* 16, 207–220. <https://doi.org/10.1038/s41575-019-0109-y>.
- Collisson, E.A., Sadanandam, A., Olson, P., Gibb, W.J., Truitt, M., Gu, S., Cooc, J., Weinkle, J., Kim, G.E., Jakkula, L., et al. (2011). Subtypes of pancreatic ductal adenocarcinoma and their differing responses to therapy. *Nat. Med.* 17, 500–503. <https://doi.org/10.1038/nm.2344>.
- Moffitt, R.A., Marayati, R., Flate, E.L., Volmar, K.E., Loeza, S.G.H., Hoadley, K.A., Rashid, N.U., Williams, L.A., Eaton, S.C., Chung, A.H., et al. (2015). Virtual microdissection identifies distinct tumor- and stroma-specific subtypes of pancreatic ductal adenocarcinoma. *Nat. Genet.* 47, 1168–1178. <https://doi.org/10.1038/ng.3398>.
- Bailey, P., Chang, D.K., Nones, K., Johns, A.L., Patch, A.M., Gingras, M.C., Miller, D.K., Christ, A.N., Bruxner, T.J.C., Quinn, M.C., et al. (2016). Genomic analyses identify molecular subtypes of pancreatic cancer. *Nature* 531, 47–52. <https://doi.org/10.1038/nature16965>.
- Puleo, F., Nicolle, R., Blum, Y., Cros, J., Marisa, L., Demetter, P., Quertinmont, E., Svrcek, M., Elarouci, N., Iovanna, J., et al. (2018). Stratification of Pancreatic Ductal Adenocarcinomas Based on Tumor and Microenvironment Features. *Gastroenterology* 155, 1999–2013.e3. <https://doi.org/10.1053/j.gastro.2018.08.033>.
- Seino, T., Kawasaki, S., Shimokawa, M., Tamagawa, H., Toshimitsu, K., Fujii, M., Ohta, Y., Matano, M., Nanki, K., Kawasaki, K., et al. (2018). Human Pancreatic Tumor Organoids Reveal Loss of Stem Cell Niche Factor Dependence during Disease Progression. *Cell Stem Cell* 22, 454–467.e6. <https://doi.org/10.1016/j.stem.2017.12.009>.
- Hay, N. (2016). Reprogramming glucose metabolism in cancer: can it be exploited for cancer therapy? *Nat. Rev. Cancer* 16, 635–649. <https://doi.org/10.1038/nrc.2016.77>.
- Shukla, S.K., Purohit, V., Mehla, K., Gunda, V., Chaika, N.V., Vernucci, E., King, R.J., Abrego, J., Goode, G.D., Dasgupta, A., et al. (2017). MUC1 and HIF-1 $\alpha$  Signaling Crosstalk Induces Anabolic Glucose Metabolism to Impart Gemcitabine Resistance to Pancreatic Cancer. *Cancer Cell* 32, 71–87.e7. <https://doi.org/10.1016/j.ccell.2017.06.004>.
- Gu, Z., Du, Y., Zhao, X., and Wang, C. (2021). Tumor microenvironment and metabolic remodeling in gemcitabine-based chemoresistance of pancreatic cancer. *Cancer Lett.* 521, 98–108. <https://doi.org/10.1016/j.canlet.2021.08.029>.
- Jain, A., and Bhardwaj, V. (2021). Therapeutic resistance in pancreatic ductal adenocarcinoma: Current challenges and future opportunities. *World J. Gastroenterol.* 27, 6527–6550. <https://doi.org/10.3748/wjg.v27.i39.6527>.
- Du, J., Gu, J., and Li, J. (2020). Mechanisms of drug resistance of pancreatic ductal adenocarcinoma at different levels. *Biosci. Rep.* 40. <https://doi.org/10.1042/bsr20200401>.
- Boroughs, L.K., and DeBerardinis, R.J. (2015). Metabolic pathways promoting cancer cell survival and growth. *Nat. Cell Biol.* 17, 351–359. <https://doi.org/10.1038/ncb3124>.
- DeNero, P., Hopkins, B.D., Cantley, L.C., and Fischbach, C. (2018). Cancer metabolism gets physical. *Sci. Transl. Med.* 10, eaaq1011. <https://doi.org/10.1126/scitranslmed.aaq1011>.
- Daemen, A., Peterson, D., Sahu, N., McCord, R., Du, X., Liu, B., Kowanzet, K., Hong, R., Moffat, J., Gao, M., et al. (2015). Metabolite profiling stratifies pancreatic ductal adenocarcinomas into subtypes with distinct sensitivities to metabolic inhibitors. *Proc. Natl. Acad. Sci. USA* 112, E4410–E4417. <https://doi.org/10.1073/pnas.1501605112>.
- Halbrook, C.J., Thurston, G., Boyer, S., Anaraki, C., Jiménez, J.A., McCarthy, A., Steele, N.G., Kerk, S.A., Hong, H.S., Lin, L., et al. (2022). Differential integrated stress response and asparagine production drive symbiosis and therapy resistance of pancreatic adenocarcinoma cells. *Nat. Can.* 3, 1386–1403. <https://doi.org/10.1038/s43018-022-00463-1>.
- Kerr, E.M., Gaude, E., Turrell, F.K., Frezza, C., and Martins, C.P. (2016). Mutant Kras copy number defines metabolic reprogramming and

- therapeutic susceptibilities. *Nature* 531, 110–113. <https://doi.org/10.1038/nature16967>.
21. Ying, H., Kimmelman, A.C., Lyssiotis, C.A., Hua, S., Chu, G.C., Fletcher-Sananikone, E., Locasale, J.W., Son, J., Zhang, H., Coloff, J.L., et al. (2012). Oncogenic Kras maintains pancreatic tumors through regulation of anabolic glucose metabolism. *Cell* 149, 656–670. <https://doi.org/10.1016/j.cell.2012.01.058>.
  22. Guillaumond, F., Leca, J., Olivares, O., Lavaut, M.N., Vidal, N., Berthezène, P., Dusetti, N.J., Loncle, C., Calvo, E., Turrini, O., et al. (2013). Strengthened glycolysis under hypoxia supports tumor symbiosis and hexosamine biosynthesis in pancreatic adenocarcinoma. *Proc. Natl. Acad. Sci. USA* 110, 3919–3924. <https://doi.org/10.1073/pnas.1219555110>.
  23. Gabitova-Cornell, L., Surumbayeva, A., Peri, S., Franco-Barraza, J., Restifo, D., Weitz, N., Ogier, C., Goldman, A.R., Hartman, T.R., Francescone, R., et al. (2020). Cholesterol Pathway Inhibition Induces TGF- $\beta$  Signaling to Promote Basal Differentiation in Pancreatic Cancer. *Cancer Cell* 38, 567–583.e11. <https://doi.org/10.1016/j.ccell.2020.08.015>.
  24. Karasinska, J.M., Topham, J.T., Kalloger, S.E., Jang, G.H., Denroche, R.E., Culibrk, L., Williamson, L.M., Wong, H.L., Lee, M.K.C., O’Kane, G.M., et al. (2020). Altered Gene Expression along the Glycolysis-Cholesterol Synthesis Axis Is Associated with Outcome in Pancreatic Cancer. *Clin. Cancer Res.* 26, 135–146. <https://doi.org/10.1158/1078-0432.CCR-19-1543>.
  25. Jin, M.Z., Han, R.R., Qiu, G.Z., Ju, X.C., Lou, G., and Jin, W.L. (2018). Organoids: An intermediate modeling platform in precision oncology. *Cancer Lett.* 414, 174–180. <https://doi.org/10.1016/j.canlet.2017.11.021>.
  26. Weeber, F., Ooft, S.N., Dijkstra, K.K., and Voest, E.E. (2017). Tumor Organoids as a Pre-clinical Cancer Model for Drug Discovery. *Cell Chem. Biol.* 24, 1092–1100. <https://doi.org/10.1016/j.chembiol.2017.06.012>.
  27. Moreira, L., Bakir, B., Chatterji, P., Dantes, Z., Reichert, M., and Rustgi, A.K. (2018). Pancreas 3D Organoids: Current and Future Aspects as a Research Platform for Personalized Medicine in Pancreatic Cancer. *Cell. Mol. Gastroenterol. Hepatol.* 5, 289–298. <https://doi.org/10.1016/j.jcmgh.2017.12.004>.
  28. Broutier, L., Andersson-Rolf, A., Hindley, C.J., Boj, S.F., Clevers, H., Koo, B.K., and Huch, M. (2016). Culture and establishment of self-renewing human and mouse adult liver and pancreas 3D organoids and their genetic manipulation. *Nat. Protoc.* 11, 1724–1743. <https://doi.org/10.1038/nprot.2016.097>.
  29. Boj, S.F., Hwang, C.I., Baker, L.A., Chio, I.I.C., Engle, D.D., Corbo, V., Jager, M., Ponz-Sarvisé, M., Tiriác, H., Spector, M.S., et al. (2015). Organoid models of human and mouse ductal pancreatic cancer. *Cell* 160, 324–338. <https://doi.org/10.1016/j.cell.2014.12.021>.
  30. Tiriác, H., Belleau, P., Engle, D.D., Plenker, D., Deschênes, A., Somerville, T.D.D., Froeling, F.E.M., Burkhart, R.A., Denroche, R.E., Jang, G.H., et al. (2018). Organoid Profiling Identifies Common Responders to Chemotherapy in Pancreatic Cancer. *Cancer Discov.* 8, 1112–1129. <https://doi.org/10.1158/2159-8290.CD-18-0349>.
  31. Shi, X., Li, Y., Yuan, Q., Tang, S., Guo, S., Zhang, Y., He, J., Zhang, X., Han, M., Liu, Z., et al. (2022). Integrated profiling of human pancreatic cancer organoids reveals chromatin accessibility features associated with drug sensitivity. *Nat. Commun.* 13, 2169. <https://doi.org/10.1038/s41467-022-29857-6>.
  32. Peng, X., Chen, Z., Farshidfar, F., Xu, X., Lorenzi, P.L., Wang, Y., Cheng, F., Tan, L., Mojumdar, K., Du, D., et al. (2018). Molecular Characterization and Clinical Relevance of Metabolic Expression Subtypes in Human Cancers. *Cell Rep.* 23, 255–269.e4. <https://doi.org/10.1016/j.celrep.2018.03.077>.
  33. Cancer Genome Atlas Research Network. Electronic address: andrew\_aguirre@dfci.harvard.edu; Cancer Genome Atlas Research Network (2017). Integrated Genomic Characterization of Pancreatic Ductal Adenocarcinoma. *Cancer Cell* 32, 185–203.e13. <https://doi.org/10.1016/j.ccell.2017.07.007>.
  34. Achalandabaso Boira, M., Di Martino, M., Gordillo, C., Adrados, M., and Martín-Pérez, E. (2020). GLUT-1 as a predictor of worse prognosis in pancreatic adenocarcinoma: immunohistochemistry study showing the correlation between expression and survival. *BMC Cancer* 20, 909. <https://doi.org/10.1186/s12885-020-07409-9>.
  35. Yu, M., Yongzhi, H., Chen, S., Luo, X., Lin, Y., Zhou, Y., Jin, H., Hou, B., Deng, Y., Tu, L., and Jian, Z. (2017). The prognostic value of GLUT1 in cancers: a systematic review and meta-analysis. *Oncotarget* 8, 43356–43367. <https://doi.org/10.18632/oncotarget.17445>.
  36. Karim, S., Adams, D.H., and Lalor, P.F. (2012). Hepatic expression and cellular distribution of the glucose transporter family. *World J. Gastroenterol.* 18, 6771–6781. <https://doi.org/10.3748/wjg.v18.i46.6771>.
  37. Szablewski, L. (2013). Expression of glucose transporters in cancers. *Biochim. Biophys. Acta* 1835, 164–169. <https://doi.org/10.1016/j.bbcan.2012.12.004>.
  38. Adekola, K., Rosen, S.T., and Shanmugam, M. (2012). Glucose transporters in cancer metabolism. *Curr. Opin. Oncol.* 24, 650–654. <https://doi.org/10.1097/CCO.0b013e328356da72>.
  39. Mueckler, M., and Thorens, B. (2013). The SLC2 (GLUT) family of membrane transporters. *Mol. Aspect. Med.* 34, 121–138. <https://doi.org/10.1016/j.mam.2012.07.001>.
  40. Baek, G., Tse, Y.F., Hu, Z., Cox, D., Buboltz, N., McCue, P., Yeo, C.J., White, M.A., DeBerardinis, R.J., Knudsen, E.S., and Witkiewicz, A.K. (2014). MCT4 defines a glycolytic subtype of pancreatic cancer with poor prognosis and unique metabolic dependencies. *Cell Rep.* 9, 2233–2249. <https://doi.org/10.1016/j.celrep.2014.11.025>.
  41. Li, M., He, X., Guo, W., Yu, H., Zhang, S., Wang, N., Liu, G., Sa, R., Shen, X., Jiang, Y., et al. (2020). Aldolase B suppresses hepatocellular carcinogenesis by inhibiting G6PD and pentose phosphate pathways. *Nat. Can.* 1, 735–747. <https://doi.org/10.1038/s43018-020-0086-7>.
  42. Cao, L., Huang, C., Cui Zhou, D., Hu, Y., Lih, T.M., Savage, S.R., Krug, K., Clark, D.J., Schnaubelt, M., Chen, L., et al. (2021). Proteogenomic characterization of pancreatic ductal adenocarcinoma. *Cell* 184, 5031–5052.e26. <https://doi.org/10.1016/j.cell.2021.08.023>.
  43. Chen, L., Zhang, Z., Hoshino, A., Zheng, H.D., Morley, M., Arany, Z., and Rabinowitz, J.D. (2019). NADPH production by the oxidative pentose-phosphate pathway supports folate metabolism. *Nat. Metab.* 1, 404–415.
  44. Sells, T.B., Chau, R., Ecsedy, J.A., Gershman, R.E., Hoar, K., Huck, J., Janowick, D.A., Kadambi, V.J., LeRoy, P.J., Stirling, M., et al. (2015). MLN8054 and Alisertib (MLN8237): Discovery of Selective Oral Aurora A Inhibitors. *ACS Med. Chem. Lett.* 6, 630–634. <https://doi.org/10.1021/ml500409n>.
  45. Dees, E.C., Infante, J.R., Cohen, R.B., O’Neil, B.H., Jones, S., von Mehren, M., Danaee, H., Lee, Y., Ecsedy, J., Manfredi, M., et al. (2011). Phase 1 study of MLN8054, a selective inhibitor of Aurora A kinase in patients with advanced solid tumors. *Cancer Chemother. Pharmacol.* 67, 945–954. <https://doi.org/10.1007/s00280-010-1377-y>.
  46. Chakravarty, A., Shinde, V., Taberner, J., Cervantes, A., Cohen, R.B., Dees, E.C., Burris, H., Infante, J.R., Macarulla, T., Elez, E., et al. (2011). Phase I assessment of new mechanism-based pharmacodynamic biomarkers for MLN8054, a small-molecule inhibitor of Aurora A kinase. *Cancer Res.* 71, 675–685. <https://doi.org/10.1158/0008-5472.Can-10-1030>.
  47. Burris, H.A., 3rd, Moore, M.J., Andersen, J., Green, M.R., Rothenberg, M.L., Modiano, M.R., Cripps, M.C., Portenoy, R.K., Storniolo, A.M., Tarassoff, P., et al. (1997). Improvements in survival and clinical benefit with gemcitabine as first-line therapy for patients with advanced pancreas cancer: a randomized trial. *J. Clin. Oncol.* 15, 2403–2413. <https://doi.org/10.1200/jco.1997.15.6.2403>.
  48. Du, W., Jiang, P., Mancuso, A., Stonestrom, A., Brewer, M.D., Minn, A.J., Mak, T.W., Wu, M., and Yang, X. (2013). TAp73 enhances the pentose phosphate pathway and supports cell proliferation. *Nat. Cell Biol.* 15, 991–1000. <https://doi.org/10.1038/ncb2789>.



49. Biankin, A.V., Waddell, N., Kassahn, K.S., Gingras, M.C., Muthuswamy, L.B., Johns, A.L., Miller, D.K., Wilson, P.J., Patch, A.M., Wu, J., et al. (2012). Pancreatic cancer genomes reveal aberrations in axon guidance pathway genes. *Nature* *491*, 399–405. <https://doi.org/10.1038/nature11547>.
50. Pauli, C., Hopkins, B.D., Prandi, D., Shaw, R., Fedrizzi, T., Sboner, A., Sailer, V., Augello, M., Puca, L., Rosati, R., et al. (2017). Personalized In Vitro and In Vivo Cancer Models to Guide Precision Medicine. *Cancer Discov.* *7*, 462–477. <https://doi.org/10.1158/2159-8290.Cd-16-1154>.
51. Braun, L.M., Lagies, S., Klar, R.F.U., Hussung, S., Fritsch, R.M., Kammerer, B., and Wittel, U.A. (2020). Metabolic Profiling of Early and Late Recurrent Pancreatic Ductal Adenocarcinoma Using Patient-Derived Organoid Cultures. *Cancers* *12*, 1440. <https://doi.org/10.3390/cancers12061440>.
52. Huang, F.T., Zhuan-Sun, Y.X., Zhuang, Y.Y., Wei, S.L., Tang, J., Chen, W.B., and Zhang, S.N. (2012). Inhibition of hedgehog signaling depresses self-renewal of pancreatic cancer stem cells and reverses chemoresistance. *Int. J. Oncol.* *41*, 1707–1714. <https://doi.org/10.3892/ijo.2012.1597>.
53. Sari, I.N., Phi, L.T.H., Jun, N., Wijaya, Y.T., Lee, S., and Kwon, H.Y. (2018). Hedgehog Signaling in Cancer: A Prospective Therapeutic Target for Eradicating Cancer Stem Cells. *Cells* *7*, 208. <https://doi.org/10.3390/cells7110208>.
54. Olive, K.P., Jacobetz, M.A., Davidson, C.J., Gopinathan, A., McIntyre, D., Honess, D., Madhu, B., Goldgraben, M.A., Caldwell, M.E., Allard, D., et al. (2009). Inhibition of Hedgehog signaling enhances delivery of chemotherapy in a mouse model of pancreatic cancer. *Science* *324*, 1457–1461. <https://doi.org/10.1126/science.1171362>.
55. O’Kane, G.M., Grünwald, B.T., Jang, G.H., Masoomian, M., Picardo, S., Grant, R.C., Denroche, R.E., Zhang, A., Wang, Y., Lam, B., et al. (2020). GATA6 Expression Distinguishes Classical and Basal-like Subtypes in Advanced Pancreatic Cancer. *Clin. Cancer Res.* *26*, 4901–4910. <https://doi.org/10.1158/1078-0432.Ccr-19-3724>.
56. Perera, S., Jang, G.H., Wang, Y., Kelly, D., Allen, M., Zhang, A., Denroche, R.E., Dodd, A., Ramotar, S., Hutchinson, S., et al. (2022). hENT1 Expression Predicts Response to Gemcitabine and Nab-Paclitaxel in Advanced Pancreatic Ductal Adenocarcinoma. *Clin. Cancer Res.* *28*, 5115–5120. <https://doi.org/10.1158/1078-0432.Ccr-22-2576>.
57. Nakano, Y., Tanno, S., Koizumi, K., Nishikawa, T., Nakamura, K., Minoguchi, M., Izawa, T., Mizukami, Y., Okumura, T., and Kohgo, Y. (2007). Gemcitabine chemoresistance and molecular markers associated with gemcitabine transport and metabolism in human pancreatic cancer cells. *Br. J. Cancer* *96*, 457–463. <https://doi.org/10.1038/sj.bjc.6603559>.
58. Crabtree, H.G. (1928). The carbohydrate metabolism of certain pathological overgrowths. *Biochem. J.* *22*, 1289–1298. <https://doi.org/10.1042/bj0221289>.
59. Chan, D.A., Sutphin, P.D., Nguyen, P., Turcotte, S., Lai, E.W., Banh, A., Reynolds, G.E., Chi, J.T., Wu, J., Solow-Cordero, D.E., et al. (2011). Targeting GLUT1 and the Warburg effect in renal cell carcinoma by chemical synthetic lethality. *Sci. Transl. Med.* *3*, 94ra70. <https://doi.org/10.1126/scitranslmed.3002394>.
60. Liu, Y., Cao, Y., Zhang, W., Bergmeier, S., Qian, Y., Akbar, H., Colvin, R., Ding, J., Tong, L., Wu, S., et al. (2012). A small-molecule inhibitor of glucose transporter 1 downregulates glycolysis, induces cell-cycle arrest, and inhibits cancer cell growth in vitro and in vivo. *Mol. Cancer Therapeut.* *11*, 1672–1682. <https://doi.org/10.1158/1535-7163.Mct-12-0131>.
61. Wang, R.C., Lee, E.E., De Simone, N., Kathote, G., Primeaux, S., Avila, A., Yu, D.M., Johnson, M., Good, L.B., Jakkamsetti, V., et al. (2023). Red blood cells as glucose carriers to the human brain: Modulation of cerebral activity by erythrocyte exchange transfusion in Glut1 deficiency (G1D). *J. Cerebr. Blood Flow Metabol.* *43*, 357–368. <https://doi.org/10.1177/0271678x221146121>.
62. Meng, Y., Xu, X., Luan, H., Li, L., Dai, W., Li, Z., and Bian, J. (2019). The progress and development of GLUT1 inhibitors targeting cancer energy metabolism. *Future Med. Chem.* *11*, 2333–2352. <https://doi.org/10.4155/fmc-2019-0052>.
63. Veys, K., Fan, Z., Ghobrial, M., Bouché, A., García-Caballero, M., Vriens, K., Concinha, N.V., Seuwen, A., Schlegel, F., Gorski, T., et al. (2020). Role of the GLUT1 Glucose Transporter in Postnatal CNS Angiogenesis and Blood-Brain Barrier Integrity. *Circ. Res.* *127*, 466–482. <https://doi.org/10.1161/circresaha.119.316463>.
64. Yang, C.A., Huang, H.Y., Lin, C.L., and Chang, J.G. (2018). G6PD as a predictive marker for glioma risk, prognosis and chemosensitivity. *J. Neuro Oncol.* *139*, 661–670. <https://doi.org/10.1007/s11060-018-2911-8>.
65. Cui, J., Pan, Y., Wang, J., Liu, Y., Wang, H., and Li, H. (2018). MicroRNA-206 suppresses proliferation and predicts poor prognosis of HR-HPV-positive cervical cancer cells by targeting G6PD. *Oncol. Lett.* *16*, 5946–5952. <https://doi.org/10.3892/ol.2018.9326>.
66. Sharma, N., Bhushan, A., He, J., Kaushal, G., and Bhardwaj, V. (2020). Metabolic plasticity imparts erlotinib-resistance in pancreatic cancer by upregulating glucose-6-phosphate dehydrogenase. *Cancer Metabol.* *8*, 19. <https://doi.org/10.1186/s40170-020-00226-5>.
67. Lu, M., Lu, L., Dong, Q., Yu, G., Chen, J., Qin, L., Wang, L., Zhu, W., and Jia, H. (2018). Elevated G6PD expression contributes to migration and invasion of hepatocellular carcinoma cells by inducing epithelial-mesenchymal transition. *Acta Biochim. Biophys. Sin.* *50*, 370–380. <https://doi.org/10.1093/abbs/gmy009>.
68. Dore, M.P., Vidili, G., Marras, G., Assy, S., and Pes, G.M. (2018). Inverse Association between Glucose-6-Phosphate Dehydrogenase Deficiency and Hepatocellular Carcinoma. *Asian Pac. J. Cancer Prev. APJCP* *19*, 1069–1073. <https://doi.org/10.22034/apjcp.2018.19.4.1069>.
69. Koch, H., and Weber, Y.G. (2019). The glucose transporter type 1 (Glut1) syndromes. *Epilepsy Behav.* *91*, 90–93. <https://doi.org/10.1016/j.yebeh.2018.06.010>.
70. Frank, J.E. (2005). Diagnosis and management of G6PD deficiency. *Am. Fam. Physician* *72*, 1277–1282.
71. Xu, T., Le, T.D., Liu, L., Su, N., Wang, R., Sun, B., Colaprico, A., Bon-tempi, G., and Li, J. (2017). CancerSubtypes: an R/Bioconductor package for molecular cancer subtype identification, validation and visualization. *Bioinformatics* *33*, 3131–3133. <https://doi.org/10.1093/bioinformatics/btx378>.
72. López-Ibáñez, J., Pazos, F., and Chagoyen, M. (2016). MBROLE 2.0—functional enrichment of chemical compounds. *Nucleic Acids Res.* *44*, W201–W204. <https://doi.org/10.1093/nar/gkw253>.
73. Hänzelmann, S., Castelo, R., and Guinney, J. (2013). GSEA: gene set variation analysis for microarray and RNA-Seq data. *BMC Bioinf.* *14*, 7. <https://doi.org/10.1186/1471-2105-14-7>.
74. Ritchie, M.E., Phipson, B., Wu, D., Hu, Y., Law, C.W., Shi, W., and Smyth, G.K. (2015). limma powers differential expression analyses for RNA-seq and microarray studies. *Nucleic Acids Res.* *43*, e47. <https://doi.org/10.1093/nar/gkv007>.
75. Hoshida, Y. (2010). Nearest template prediction: a single-sample-based flexible class prediction with confidence assessment. *PLoS One* *5*, e15543. <https://doi.org/10.1371/journal.pone.0015543>.
76. Wu, T., Hu, E., Xu, S., Chen, M., Guo, P., Dai, Z., Feng, T., Zhou, L., Tang, W., Zhan, L., et al. (2021). clusterProfiler 4.0: A universal enrichment tool for interpreting omics data. *Innovation* *2*, 100141. <https://doi.org/10.1016/j.xinn.2021.100141>.
77. Langmead, B., and Salzberg, S.L. (2012). Fast gapped-read alignment with Bowtie 2. *Nat. Methods* *9*, 357–359. <https://doi.org/10.1038/nmeth.1923>.
78. Tarasov, A., Vilella, A.J., Cuppen, E., Nijman, I.J., and Prins, P. (2015). Sambamba: fast processing of NGS alignment formats. *Bioinformatics* *31*, 2032–2034. <https://doi.org/10.1093/bioinformatics/btv098>.
79. Li, H., Handsaker, B., Wysoker, A., Fennell, T., Ruan, J., Homer, N., Marth, G., Abecasis, G., and Durbin, R.; 1000 Genome Project Data Processing Subgroup (2009). The Sequence Alignment/Map format and SAMtools. *Bioinformatics* *25*, 2078–2079.

80. Zhang, Y., Liu, T., Meyer, C.A., Eeckhoute, J., Johnson, D.S., Bernstein, B.E., Nusbaum, C., Myers, R.M., Brown, M., Li, W., and Liu, X.S. (2008). Model-based analysis of ChIP-Seq (MACS). *Genome Biol.* 9, R137. <https://doi.org/10.1186/gb-2008-9-9-r137>.
81. Ramírez, F., Dündar, F., Diehl, S., Grüning, B.A., and Manke, T. (2014). deepTools: a flexible platform for exploring deep-sequencing data. *Nucleic Acids Res.* 42, W187–W191. <https://doi.org/10.1093/nar/gku365>.
82. Ross-Innes, C.S., Stark, R., Teschendorff, A.E., Holmes, K.A., Ali, H.R., Dunning, M.J., Brown, G.D., Gojis, O., Ellis, I.O., Green, A.R., et al. (2012). Differential oestrogen receptor binding is associated with clinical outcome in breast cancer. *Nature* 481, 389–393. <https://doi.org/10.1038/nature10730>.
83. Liu, G., Wang, N., Zhang, C., Li, M., He, X., Yin, C., Tu, Q., Shen, X., Zhang, L., Lv, J., et al. (2021). Fructose-1,6-Bisphosphate Aldolase B Depletion Promotes Hepatocellular Carcinogenesis Through Activating Insulin Receptor Signaling and Lipogenesis. *Hepatology* 74, 3037–3055. <https://doi.org/10.1002/hep.32064>.
84. Subramanian, A., Tamayo, P., Mootha, V.K., Mukherjee, S., Ebert, B.L., Gillette, M.A., Paulovich, A., Pomeroy, S.L., Golub, T.R., Lander, E.S., and Mesirov, J.P. (2005). Gene set enrichment analysis: a knowledge-based approach for interpreting genome-wide expression profiles. *Proc. Natl. Acad. Sci. USA* 102, 15545–15550. <https://doi.org/10.1073/pnas.0506580102>.
85. Vasaikar, S., Huang, C., Wang, X., Petyuk, V.A., Savage, S.R., Wen, B., Dou, Y., Zhang, Y., Shi, Z., Arshad, O.A., et al. (2019). Proteogenomic Analysis of Human Colon Cancer Reveals New Therapeutic Opportunities. *Cell* 177, 1035–1049.e19. <https://doi.org/10.1016/j.cell.2019.03.030>.
86. Kotaka, M., Gover, S., Vandeputte-Rutten, L., Au, S.W.N., Lam, V.M.S., and Adams, M.J. (2005). Structural studies of glucose-6-phosphate and NADP<sup>+</sup> binding to human glucose-6-phosphate dehydrogenase. *Acta Crystallogr. D Biol. Crystallogr.* 61, 495–504. <https://doi.org/10.1107/s0907444905002350>.

## STAR★METHODS

### KEY RESOURCES TABLE

| REAGENT or RESOURCE                                  | SOURCE            | IDENTIFIER                      |
|------------------------------------------------------|-------------------|---------------------------------|
| <b>Antibodies</b>                                    |                   |                                 |
| GLUT1                                                | abcam             | Cat#ab115730; RRID:AB_10903230  |
| ALDOA                                                | proteintech       | Cat#11217-1-AP; RRID:AB_2224626 |
| ALDOB                                                | proteintech       | Cat#18065-1-AP; RRID:AB_2273968 |
| ALDOC                                                | proteintech       | Cat#14884-1-AP; RRID:AB_2226691 |
| G6PD                                                 | abcam             | Cat#ab993; RRID:AB_296714       |
| $\alpha$ -tubulin                                    | proteintech       | Cat#11224-1-AP; RRID:AB_2210206 |
| actin                                                | abmart            | Cat#M20011; RRID:AB_2936240     |
| <b>Biological samples</b>                            |                   |                                 |
| Human tissue samples for sequencing analyses         | This study        | N/A                             |
| Human blood samples for sequence analyses            | This study        | N/A                             |
| <b>Chemicals, peptides, and recombinant proteins</b> |                   |                                 |
| Advanced DMEM/F12                                    | Gibco             | Cat#12634010                    |
| HEPES                                                | Gibco             | Cat#15630080                    |
| GlutMAX                                              | Gibco             | Cat#35050061                    |
| Penicillin-Streptomycin                              | Gibco             | Cat#15140122                    |
| Primocin                                             | InvivoGen         | Cat#ant-pm-2                    |
| B27 supplement                                       | Gibco             | Cat#17504044                    |
| Wnt3A conditioned medium                             | Gao lab           | N/A                             |
| R-spondin conditioned medium                         | Gao lab           | N/A                             |
| Noggin conditioned medium                            | Gao lab           | N/A                             |
| Nicotinamide                                         | SIGMA             | Cat#N0636-100G                  |
| EGF                                                  | Invitrogen        | Cat#PHG0313                     |
| FGF10                                                | PEPRO TECH        | Cat#K2717                       |
| N-acetyl-L-cysteine                                  | SIGMA             | Cat#A9165-100G                  |
| A83-01                                               | TOCRIS            | Cat#2939                        |
| Y-27632                                              | Selleck chemicals | Cat#S1049                       |
| Forskolin                                            | Selleck chemicals | Cat#S2449                       |
| TrypLE™ Express                                      | Gibco             | Cat#12605028                    |
| Collagenase Type II                                  | Gibco             | Cat#17101015                    |
| Matrigel Matrix (For organoid culture)               | CORNING           | Cat#356231                      |
| Matrigel Matrix (For xenograft)                      | CORNING           | Cat#354234                      |
| Gemcitabine                                          | TargetMol         | Cat#T0251                       |
| Paclitaxel                                           | Selleck chemicals | Cat#S1150                       |
| 5-fluorouracil                                       | SIGMA             | Cat#F6627                       |
| Oxaliplatin                                          | Selleck chemicals | Cat#S1124                       |
| Irinotecan                                           | Selleck chemicals | Cat#S1198                       |
| BAY-876                                              | Selleck chemicals | Cat#S8452                       |
| 6AN                                                  | Selleck chemicals | Cat#S9783                       |
| MLN8054                                              | TargetMol         | Cat#T6315                       |
| Alisertib                                            | Selleck chemicals | Cat#S1133                       |
| Uridine                                              | Sigma             | Cat#U3003                       |
| Cytidine                                             | Sigma             | Cat#C4654                       |

(Continued on next page)

| <b>Continued</b>                                    |                                             |                                                                                                                                                                                 |
|-----------------------------------------------------|---------------------------------------------|---------------------------------------------------------------------------------------------------------------------------------------------------------------------------------|
| REAGENT or RESOURCE                                 | SOURCE                                      | IDENTIFIER                                                                                                                                                                      |
| Thymidine                                           | Sigma                                       | Cat#T1895                                                                                                                                                                       |
| Guanosine                                           | Sigma                                       | Cat#G6264                                                                                                                                                                       |
| adenosine                                           | Sigma                                       | Cat#A4036                                                                                                                                                                       |
| R5P                                                 | MCE                                         | Cat#207671-46-3                                                                                                                                                                 |
| CellTiter-Glo Luminescent                           | Promega                                     | Cat#G7573                                                                                                                                                                       |
| DMSO                                                | Innoche                                     | Cat#D3850-500ML                                                                                                                                                                 |
| TRIzol reagent                                      | Ambion                                      | Cat#15596018                                                                                                                                                                    |
| PrimeScript™ RT Master Mix                          | TaKaRa                                      | Cat#RR036A                                                                                                                                                                      |
| Power SYBR Green PCR Master Mix                     | Qiagen                                      | Cat#208054                                                                                                                                                                      |
| Glucose-6-phosphate                                 | Sigma                                       | G7879-500mg                                                                                                                                                                     |
| DMEM                                                | Gibco                                       | 11966-025                                                                                                                                                                       |
| [U- <sup>13</sup> C <sub>6</sub> ] glucose          | CIL                                         | CLM-1396-1                                                                                                                                                                      |
| Nonlabeled glucose                                  | Sigma                                       | G7021                                                                                                                                                                           |
| <b>Critical commercial assays</b>                   |                                             |                                                                                                                                                                                 |
| Widely targeted metabolomics assay                  | Wuhan Metware Biotechnology Co., Ltd        | LC-ESI-MS/MS system analysis                                                                                                                                                    |
| Widely targeted lipidomics assay                    | Wuhan Metware Biotechnology Co., Ltd        | LC-ESI-MS/MS system analysis                                                                                                                                                    |
| Metabolon-based energy metabolism detection         | Applied Protein Technology, Shanghai, China | LC-MS/MS analysis                                                                                                                                                               |
| <b>Deposited data</b>                               |                                             |                                                                                                                                                                                 |
| Widely targeted metabolomics                        | This study                                  | OMIX: OMIX003772                                                                                                                                                                |
| Widely targeted lipidomics assay                    | This study                                  | OMIX: OMIX004117                                                                                                                                                                |
| Metabolon-based energy metabolism in PDAC organoids | This study                                  | OMIX: OMIX004545                                                                                                                                                                |
| RNA expression data of PDAC organoids               | This study                                  | OMIX: OMIX003773                                                                                                                                                                |
| ATAC-seq peaks of PDAC organoids                    | This study                                  | OMIX: OMIX003774                                                                                                                                                                |
| Coding mutations in PDAC organoids                  | This study                                  | OMIX: OMIX003813                                                                                                                                                                |
| <b>Experimental models: Cell lines</b>              |                                             |                                                                                                                                                                                 |
| HEK-293T                                            | ATCC                                        | Cat#CRL-1573                                                                                                                                                                    |
| <b>Experimental models: Organisms/strains</b>       |                                             |                                                                                                                                                                                 |
| Human PDAC organoids                                | This study                                  | N/A                                                                                                                                                                             |
| DH5α                                                | AlpaLifeBio                                 | KTSM101L                                                                                                                                                                        |
| <b>Oligonucleotides</b>                             |                                             |                                                                                                                                                                                 |
| shRNA hairpins                                      | This study                                  | Table S6                                                                                                                                                                        |
| qRT-PCR primers                                     | This study                                  | Table S6                                                                                                                                                                        |
| <b>Software and algorithms</b>                      |                                             |                                                                                                                                                                                 |
| R version 4.0.3                                     | The R Foundation for Statistical Computing  | N/A                                                                                                                                                                             |
| “CancerSubtypes” Bioconductor package for R         | Xu et al. <sup>71</sup>                     | <a href="https://bioconductor.org/packages/release/bioc/html/CancerSubtypes.html">https://bioconductor.org/packages/release/bioc/html/CancerSubtypes.html</a>                   |
| MBROLE 2.0                                          | López-Ibáñez et al. <sup>72</sup>           | <a href="https://csbg.cnb.csic.es/mbrole2/">https://csbg.cnb.csic.es/mbrole2/</a>                                                                                               |
| “GSVA” Bioconductor package for R                   | Hänzelmann et al. <sup>73</sup>             | <a href="https://www.bioconductor.org/packages/release/bioc/html/GSVA.html">https://www.bioconductor.org/packages/release/bioc/html/GSVA.html</a>                               |
| “limma” Bioconductor package for R                  | Ritchie et al. <sup>74</sup>                | <a href="https://bioconductor.org/packages/release/bioc/html/limma.html">https://bioconductor.org/packages/release/bioc/html/limma.html</a>                                     |
| Nearest Template Prediction (NTP)                   | Hoshida. <sup>75</sup>                      | <a href="https://github.com/genepattern/NearestTemplatePrediction/blob/master/src/NTPez.R">https://github.com/genepattern/NearestTemplatePrediction/blob/master/src/NTPez.R</a> |
| “clusterProfiler” Bioconductor package for R        | Wu et al. <sup>76</sup>                     | <a href="https://bioconductor.org/packages/release/bioc/html/clusterProfiler.html">https://bioconductor.org/packages/release/bioc/html/clusterProfiler.html</a>                 |
| Bowtie v2.3.1                                       | Langmead and Salzberg. <sup>77</sup>        | <a href="https://bowtie-bio.sourceforge.net/bowtie2/index.shtml">https://bowtie-bio.sourceforge.net/bowtie2/index.shtml</a>                                                     |
| Sambamba v0.6.6                                     | Tarasov et al. <sup>78</sup>                | <a href="https://lomereiter.github.io/sambamba/">https://lomereiter.github.io/sambamba/</a>                                                                                     |

(Continued on next page)

**Continued**

| REAGENT or RESOURCE                   | SOURCE                          | IDENTIFIER                                                                                                                                                                      |
|---------------------------------------|---------------------------------|---------------------------------------------------------------------------------------------------------------------------------------------------------------------------------|
| Samtools v1.4                         | Li et al. <sup>79</sup>         | <a href="https://samtools.sourceforge.net/">https://samtools.sourceforge.net/</a>                                                                                               |
| MACS2 v2.1.1                          | Zhang et al. <sup>80</sup>      | <a href="https://hbctraining.github.io/Intro-to-ChIPseq/lessons/05_peak_calling_macs.html">https://hbctraining.github.io/Intro-to-ChIPseq/lessons/05_peak_calling_macs.html</a> |
| deepTools                             | Ramírez et al. <sup>81</sup>    | <a href="https://deeptools.readthedocs.io/en/develop/">https://deeptools.readthedocs.io/en/develop/</a>                                                                         |
| “DiffBind” Bioconductor package for R | Ross-Innes et al. <sup>82</sup> | <a href="https://bioconductor.org/packages/release/bioc/html/DiffBind.html">https://bioconductor.org/packages/release/bioc/html/DiffBind.html</a>                               |

**RESOURCE AVAILABILITY**

**Lead contact**

Further information and requests for resources and reagents should be directed to and will be fulfilled by the lead contact, Gang Jin ([jingang@smmu.edu.cn](mailto:jingang@smmu.edu.cn)).

**Materials availability**

This study did not generate new unique reagents.

**Data and code availability**

The data reported in this paper have been deposited in the OMIX, China National Center for Bioinformation/Beijing Institute of Genomics, Chinese Academy of Sciences (<https://ngdc.cncb.ac.cn/omix>: accession no.OMIX003772, no.OMIX003773, no.OMIX003774, no.OMIX003813, no.OMIX004117, no.OMIX004545). This paper does not report original code. Any additional information required to reanalyze the data reported in this work paper is available from the [lead contact](#) upon request.

**EXPERIMENTAL MODEL AND STUDY PARTICIPANT DETAILS**

**Human subjects ethics statement**

PDAC tissue samples were collected at Changhai Hospital. All patients involved in this study gave informed consent for the use of their clinical data and surgical specimens and agreed to the release of clinical information that could identify individuals. The protocols for this study were in conformity with national guidelines and received approval from Changhai Hospital’s ethics committee (approval no. CHEC2018-111). Furthermore, this study was approved by the Chinese Ministry of Science and Technology (MOST) for the Review and Approval of Human Genetic Resources (approval no. 2021BAT1264) in addition to the local IRB’s permission. A total of 28 patient cases from both male and female subjects between the ages of 40–79 years old were included in the present study. Detailed clinical information of these patients was listed in [Table S1](#).

**Organoid culture**

PDAC tissues were digested in collagenase II (2.5 mg/mL with 10 μM Y-27632) at 37°C for approximately 30 min. The digested cells were washed with basic 1640 medium (10 μM Y-27632) for twice and centrifuged for 5min (1500rpm, RT). The obtained cells were embedded in Matrigel and overlaid with a previously described complete medium.<sup>31</sup> The complete medium components are list in the key resource table. PDAC biopsy samples was directly cultured in complete medium without digestion. Organoids was cultured at 5% CO<sub>2</sub> in 20% O<sub>2</sub>, and the media were changed every 4 days. The established organoids were for mycoplasma contamination weekly. All established PDAC organoids were expanded and stored as cryo-stocks. The media used for organoid cryopreservation were composed of the complete medium (90%) and 10% DMSO.

**Mouse studies**

Female SCID mice of 4-week-old were purchased from Biocytogen Pharmaceuticals (Beijing) Co., Ltd. All animal work was conducted in accordance with a protocol approved by the Institutional Animal Care and Use Committee (IACUC) of the Center for Excellence in Molecular Cell Science (CEMCS), and ethical approval was received from the IACUC of CEMCS. Mice were bred in specific pathogen free (SPF) animal house with 28°C and 50% humidity. Indicated cells were inoculated into mammary pad of the six-week-old female SCID mouse (n = 3 per group, 2 × 10<sup>6</sup> cells/injection). After the xenografts became palpable (~200mm<sup>3</sup>), mice were injected with 5-FU (25 mg/kg, every 2 days), 6AN (5 mg/kg, every 2 days), MLN8054 (10 mg/kg, every 2 days), alisertib (10 mg/kg, every 2 days) intraperitoneal for about 2 weeks. Tumor size was measured every 2 days and the tumor volume was calculated with the equation  $V \text{ (in mm}^3\text{)} = 0.5 \times \text{length} \times \text{width}^2$ . The animals were killed when the biggest xenografts near reached at ~1500mm<sup>3</sup>.

## METHOD DETAILS

### Widely targeted metabolomics assay

PDAC organoids in Matrigel (CORNING, 356231) were collected. Organoids were washed twice with 1 mL of cold PBS buffer and were then centrifuged for 3 min at  $500 \times g$  ( $4^{\circ}\text{C}$ ). The supernatant was removed and discarded; cell pallet was used for widely targeted metabolites assay (Wuhan Metware Biotechnology Co., Ltd). Sample was thawed on ice, then added 1 mL pre-cooled extractant (70% methanol aqueous solution), and whirl for 1 min. Freeze the mixture for 3 min in liquid nitrogen after remove ice for 3 min, it will be whirled for 2 min, circulate this at 3 times. Centrifuge the mixture again with 12000 r/min at  $4^{\circ}\text{C}$  for 10 min. Finally take the supernatant into the sample bottle for LC-ESI-MS/MS system analysis. In order to compare the substance content of all detected metabolites in different organoids, the chromatographic peaks detected in different samples for each metabolite were corrected to ensure qualitative and quantitative accurate according to the information of metabolite retention time and peak shape. Quality control samples are prepared by mixing sample extracts to test reproducibility.

### Widely targeted lipidomics assay

Organoids were washed twice with 1 mL of cold PBS buffer and were then centrifuged for 3 min at  $500 \times g$  ( $4^{\circ}\text{C}$ ). The supernatant was removed and discarded; cell pallet was placed in liquid nitrogen for 2 min, then thawed on ice for 5 min and vortex blending. Repeat the first step 3 times, then centrifuge it with 12,000 rpm at  $4^{\circ}\text{C}$  for 10 min. Take 300  $\mu\text{L}$  supernatant and homogenize it with 1 mL mixture (include methanol, MTBE and internal standard mixture). Whirl the mixture for 2 min. Then add 500  $\mu\text{L}$  of water and whirl the mixture for 1 min, and centrifuge it with 12,000 rpm at  $4^{\circ}\text{C}$  for 10 min. Extract 500  $\mu\text{L}$  supernatant and concentrate it. Dissolve powder with 100  $\mu\text{L}$  mobile phase B, then stored in  $-80^{\circ}\text{C}$ . Finally take the dissolving solution into the sample bottle for LC-MS/MS analysis.

### Metabolon-based energy metabolism detection

PDAC organoids in Matrigel were collected. Organoids were washed twice with 1 mL of cold PBS buffer and were then centrifuged for 3 min at  $500 \times g$  and  $4^{\circ}\text{C}$ . The supernatant was removed and discarded; cell pallet was used for metabolon-based energy metabolism detection (Applied Protein Technology, Shanghai, China). A homogenate of 100 mg of sample mixed with 1 mL of cold methanol/acetonitrile/ $\text{H}_2\text{O}$  (2:2:1, v/v/v) was sonicated at a low temperature (30 min/once, twice) and then centrifuged for 20 min (140,00g,  $4^{\circ}\text{C}$ ). The supernatant was dried in a vacuum centrifuge. For LC-MS analysis, the dried samples were dissolved in 100  $\mu\text{L}$  acetonitrile/water (1:1, v/v), adequately vortexed and then centrifuged (140,00 rpm,  $4^{\circ}\text{C}$ , 15 min). The supernatants were collected for the LC-MS/MS analysis. Analyses were performed using an UHPLC (1290 Infinity LC, Agilent Technologies) coupled to a QTRAP (AB Sciex 5500).

### Metabolic flux experiments using [ $\text{U}-^{13}\text{C}_6$ ] glucose

Organoids were seeded at a density of approximately  $1 \times 10^7$  cells per 10 cm dish. The labeling medium composed of DMEM (Gibco, 11966-025) with a supplement of 1 g/L [ $\text{U}-^{13}\text{C}_6$ ] glucose (CIL, CLM-1396-1), 1 g/L nonlabeled glucose (Sigma, G7021), 10% (v/v) FBS, 1 mM pyruvate, unlabeled 2 mM L-glutamine and 1% (v/v) penicillin-streptomycin. The labeling time of [ $\text{U}-^{13}\text{C}_6$ ] glucose was 24h. Metabolic flux experiments were performed according to a previous report.<sup>41,83</sup>

### Measurement of labeled metabolites of isotopomers by GC-MS, LC-MS and UHPLC-QTOF system

Metabolites of glycolysis, TCA cycle, oxidative PPP and nonoxidative PPP were measured followed a previously published protocol.<sup>41,83</sup>

### Measurement of G6PD enzymatic activity

G6PD activity was measured at room temperature. G6PD was immunoprecipitated from the lysates of organoids and subjected to G6PD enzymatic activity assays in the reaction buffer containing 42 mM Tris (PH 7.5), 2.66 mM Glucose-6-phosphate (Sigma, G7879-500mg), 40 mM  $\text{MgCl}_2$ , 0.66 mM  $\beta$ -NADP. The change in absorbance at 340 nm owing to increase of NADPH was measured using BioTek Synergy Neo Multi-Mode Plate Reader (BioTek, USA).

### Immunoprecipitation and immunoblotting

For pancreatic cancer organoid cells, cell lysate (25 mM Tris-HCl pH 8.0, 150 mM NaCl, 1 mM  $\text{CaCl}_2$ , 1%, 1 Triton X-100) with EDTA-free protease inhibitors (Biotool) was added to the dish, gently scraped with cell scraping and transferred to a 1.5 mL centrifuge tube, sonicated for 2s, 0.5s apart with a total length of 0.3 min, and let for 30 min on ice for full lysis. Treated cell homogenates at  $4^{\circ}\text{C}$  were centrifuged at 12,000 r p m for 10 min. Protein concentration was detected using protein kit. The Protein A/G PLUS-beads (Santa Cruz) was closed in  $4^{\circ}\text{C}$  with 0.1% BSA for 1 h, washed three times with Wash buffer, centrifuged at 400 g to remove the waste liquid, and the beads was stored in a  $4^{\circ}\text{C}$  refrigerator. After the protein concentration was determined, the cell lysate was quantified to a total protein amount of 2 mg, and the primary antibody was added to the cell lysate at a ratio of 1:100, incubated overnight at  $4^{\circ}\text{C}$  to bind the antibody to the target protein. The next day, the mixture of antibody and protein was incubated with the blocked Protein A/G PLUS-Beads for 6 h at  $4^{\circ}\text{C}$  to bind the immunoprecipitated complex to beads. By centrifugation at 300g of the cells for 4 min at

4°C, washing the beads with Wash buffer (50 mM Tris-HCl, 400 mM NaCl and 0.8% Triton X-100, pH 7.5) for 3–5 min each. After the second wash, it was transferred to a new 1.5 mL centrifuge tube and then repeated twice, finally adding 90  $\mu$ L prediluted 1X loading buffer, 95°C metal bath for 10 min and 12,000 rpm for 3 min to dissociate the protein from the beads for western assay.

### Drug-treatment assays

384-well plates (Corning, 3765) were coated with 10  $\mu$ L of collagen before the addition of PDAC organoids (3,000 cells per well, 50  $\mu$ L). Chemotherapeutic agents as well as DMSO (Innoche, D3850-500ML) controls were added in triplicate using HP D300e Digital Dispenser. Cell viability was assayed by CellTiter-Glo Reagent (Promega, G7573), SRB solution (Sigma, S1403-25g) or CCK-8 (Wako, A311-01) after five days treatment. To measure sensitivity, we used 5–8-point dose-response curves; for each drug, the corresponding cell viability values were used as input for curve generation. Average inhibition rates from three independent experiments were calculated with Excel and visualized using GraphPad Prism 8. Each drug concentration (nM/L) was log<sub>10</sub> transformed. The AUC was calculated with the integral function in R, and the normalized AUC was obtained by dividing one AUC by the maximum AUC for each drug. GEM (TargetMol, T0251); 5-FU (SIGMA, F6627); IRI (Selleck chemicals, S1198); OXA (Selleck chemicals, S1124); PTX (Selleck chemicals, S1150); BAY-876 (Selleck chemicals, S8452); 6AN (Selleck chemicals, S9783); MLN8054 (TargetMol; T6315); Alistertib (Selleck chemicals, S1133); Pyrimidine nucleosides include uridine (Sigma, U3003), cytidine (Sigma, C4654), thymidine (Sigma, T1895), with a final concentration of 240  $\mu$ M; Purine nucleosides include Guanosine (Sigma, G6264) and adenosine (Sigma, A4036), with a final concentration of 200  $\mu$ M; R5P (MCE, 207671-46-3) with a final concentration of 1 mM.

### Immunohistochemistry

Immunohistochemistry was performed as described in our previous study.<sup>31</sup> The antibodies used for staining TMA was as follows: Anti-GLUT1 (1/500, abcam, ab115730) and anti-ALDOB (1/2000, proteintech, 18065-1-AP).

### qRT-PCR

Total RNA was extracted with TRIzol reagent (Ambion, 15596018) from cells for the generation of single stranded cDNA. Reverse transcription was further performed with PrimeScript™ RT Master Mix (TaKaRa, RR036A) with 500 ng of total RNA as input. Quantitative RT-PCR (qRT-PCR) was performed using an ABI 7300 Real-Time PCR System (Applied Biosystems) with the Power SYBR Green PCR Master Mix (Qiagen, 208054). The primers used for each of the genes are listed (Table S6).

### Metabolomics-based subtyping

Unsupervised classification of PDAC metabolomics was conducted with consensus clustering (R package “CancerSubtypes”; clusterAlg = “hc”, distance = “euclidean”, innerLinkage = “ward.D2”).<sup>71</sup> Differential compounds in each subtype were calculated by Wilcoxon rank-sum test (P-value < 0.05, Fold-change > 1.2) and functional enrichment analysis was performed by MBROLE 2.0 with dysregulated metabolomics (FDR < 0.05).<sup>72</sup> Single-sample gene set enrichment analysis (ssGSEA) was used to calculate enrichment score of the six metabolic ontology classes in two metabolic subtypes (R package “GSVA”).<sup>73</sup>

Differential expressed genes (DEGs) of two metabolic subtypes were calculated by R package limma with corresponding RNA-seq data (log<sub>2</sub> transformed FPKM values, cutoff: P-value < 0.05 and Fold-change > 1.5).<sup>74</sup> We then used these signature genes to make class prediction of Bailey PDAC cohort and TCGA PDAC cohort by NearestTemplatePrediction (NTP) and split these two cohorts into glucomet and lipomet subtype respectively.<sup>75</sup> Only Squamous and Pancreatic progenitor samples for Bailey cohort (n = 55) and ductal pancreatic cancers samples were included for TCGA cohort (n = 156). In addition, gene set enrichment analysis (GSEA) was performed to determine KEGG pathways enriched in two metabolic subtypes with ranked genes list (R package “clusterProfiler”).<sup>76,84</sup>

Corresponding whole-genome sequencing data were also used to explore genomic difference between two metabolic subtypes. Nonsynonymous somatic mutations were counted and then divided by the size of the coding region (~45M) to calculate tumor mutation burden (TMB). To calculate the chromosome instability (CIN), we used a weighted-sum approach following another study.<sup>85</sup> First, absolute log<sub>2</sub> ratios of all CNV segments within a chromosome were weighted by the segment length and summed up to derive the instability score for each chromosome. Then, the genome-wide chromosome instability index was obtained by summing up the instability score of all 22 autosomes. Wilcoxon rank-sum test was used to calculate difference of TMB and CIN between two metabolic subtypes.

### ATAC-data processing

Raw fastq data of ATAC-seq was mapped to the human reference genome hg19 with Bowtie v2.3.1 and then duplicate reads were removed with Sambamba v0.6.6.<sup>77,78</sup> Then Samtools v1.4 was used to filter uniquely aligned reads and reads of chrM were filtered out.<sup>79</sup> Peak calling was conducted with MACS2 v2.1.1 and the threshold was set as p < 0.0001.<sup>80</sup> R package DiffBind was then used to compute differential peaks among different conditions (p < 0.05).<sup>82</sup> In addition, deepTools bamCoverage (with parameters –normalizeUsingRPKM) was used to convert bam files into bigwig format and then deepTools plotHeatmap was used for visualization of differential peaks.<sup>81</sup>

### Crystal structure of G6PD and substrate

The crystal structure of the complex of human G6PD with substrate glucose 6-phosphate(G6P) (PDB ID: 2BHL)<sup>86</sup> was aligned to the complex of human G6PD with the structural NADP and coenzyme NADP (PDB ID: 2BH9), after being prepared by Protein Preparation Wizard (Schrödinger Release 2022-1: Protein Preparation Wizard; Epik, Schrödinger, LLC, New York, NY, 2022; Impact, Schrödinger, LLC, New York, NY; Prime, Schrödinger, LLC, New York, NY, 2022). Then G6P in 2BHL was extracted and merged with 2BH9. A conformation minimization of the amino acids in the merged structure around G6P (within 5 Å) was carried out by Prime (Schrödinger Release 2022-1: Prime, Schrödinger, LLC, New York, NY, 2022). The minimized complex was taken as the receptor for virtual screening with G6P binding site as the grid center. The compounds (7098 compounds) were prepared by LigPrep (Schrödinger Release 2022-1: LigPrep, Schrödinger, LLC, New York, NY, 2022) and docked into the receptor at the SP precision by Glide (Schrödinger Release 2022-1: Glide, Schrödinger, LLC, New York, NY, 2022). The docked ligand-protein complexes in 3D and the 2D ligand-protein interaction diagrams were presented by Maestro (Schrödinger Release 2022-1: Maestro, Schrödinger, LLC, New York, NY, 2022).

### QUANTIFICATION AND STATISTICAL ANALYSIS

Experimental data were analyzed by Student's *t* test, Wilcoxon rank-sum test, Pearson correlation analysis or log rank test. The detailed statistical tests were indicated in figures legends.



**Cell Reports Medicine, Volume 4**

**Supplemental information**

**Metabolic classification suggests**

**the GLUT1/ALDOB/G6PD axis as a therapeutic target**

**in chemotherapy-resistant pancreatic cancer**

**Yunguang Li, Shijie Tang, Xiaohan Shi, Jingwen Lv, Xueyuan Wu, Yehan Zhang, Huan Wang, Juan He, Yiqin Zhu, Yi Ju, Yajuan Zhang, Shiwei Guo, Weiwei Yang, Huiyong Yin, Luonan Chen, Dong Gao, and Gang Jin**

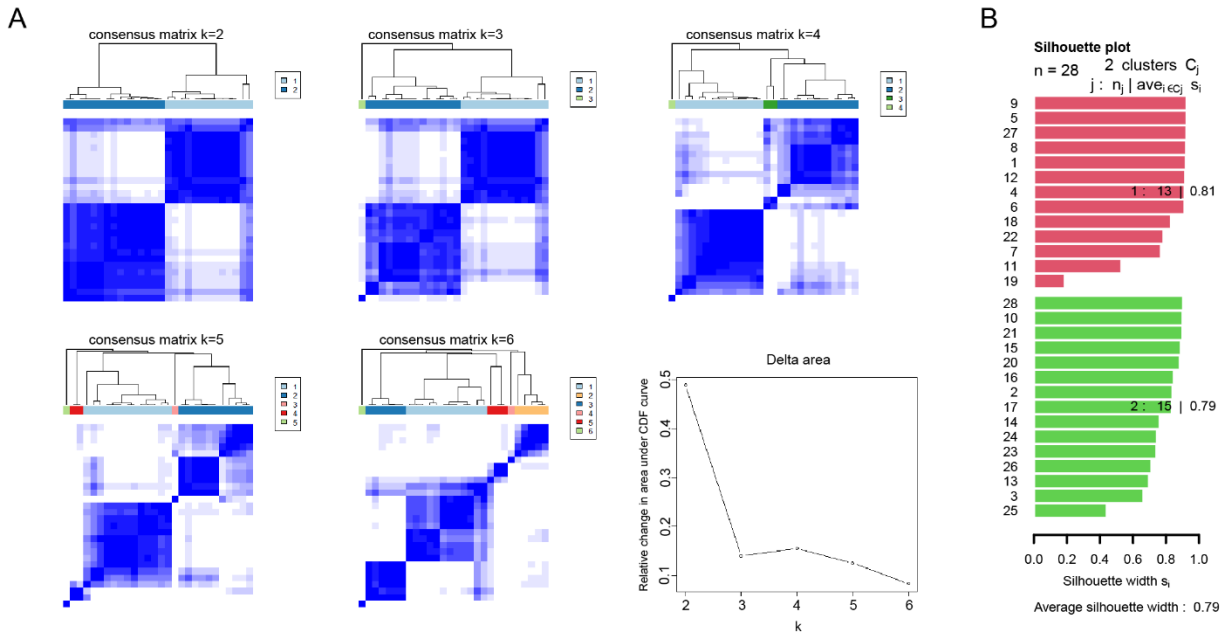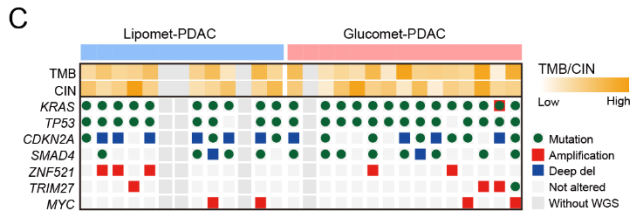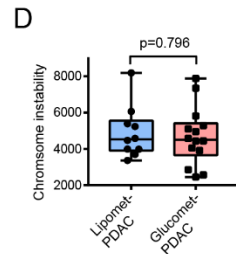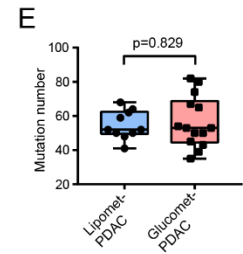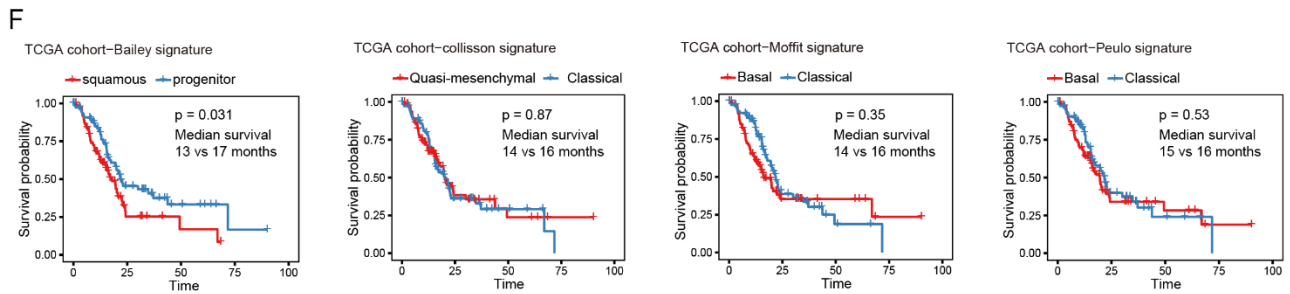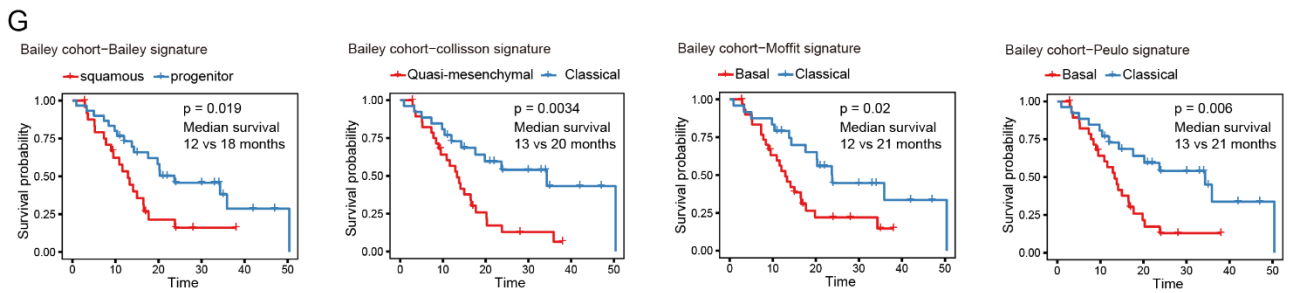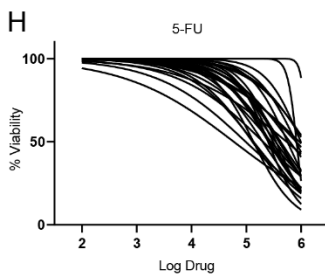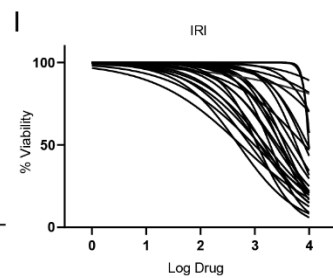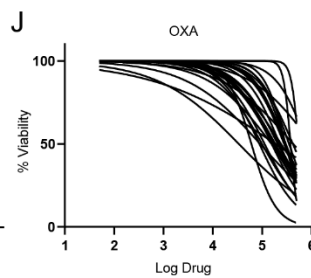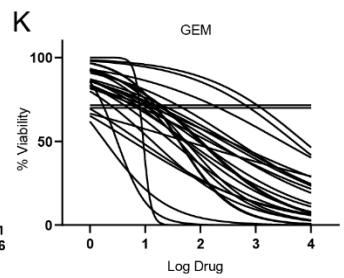

**Figure S1. Metabolic profiles divide PDAC into two subtypes.** Related to Figure 1 and Figure 2. (A) Unsupervised classification of PDAC metabolomics using consensus clustering. Solutions are shown for  $k = 2$  to  $k = 6$  classes. A peak cophenetic correlation is observed for  $k = 2$  classes. (B) Silhouette information for  $k = 2$  classes. (C) Analysis of alterations at the genomic level among the two metabolic subgroups. The gene alterations are indicated as follows: Top cancer-related genes with protein-coding mutations (green); Top cancer-related copy number alteration status is amplification (red) and deep deletion (blue); wild-type (light gray). (D and E) Comparison of chromosome instability (D) and mutation number (E) between glucomet-PDAC and lipomet-PDAC. The boxplot shows the median (central line) and the 25-75% interquartile range (box limits). (F and G) Kaplan-Meier survival curves of the TCGA PDAC cohort (F) and Bailey PDAC cohort (G) split independently by RNA signatures (Bailey signature, Collisson signature, Moffit signature and Peulo signature). (H-K) Dose-response curves and normalized AUC distribution for 5-FU (H), IRI (I), OXA (J), and GEM (K) on glucomet-PDAC and lipomet-PDAC. Statistical significance was computed by unpaired Student's t test (D and E). Statistical significance was computed by log-rank test (F and G).

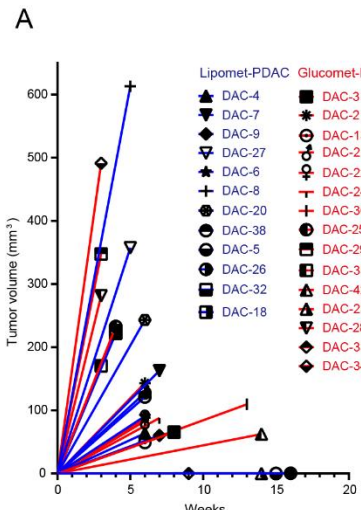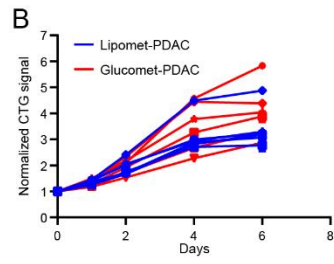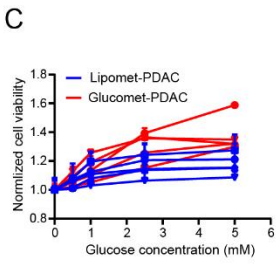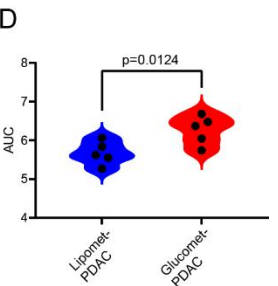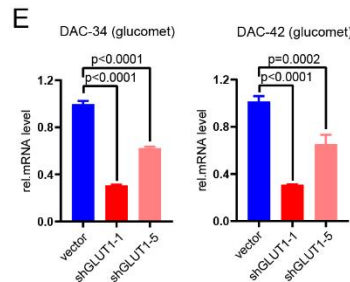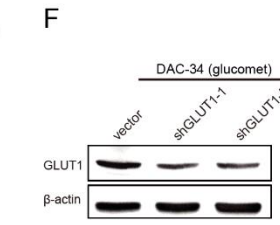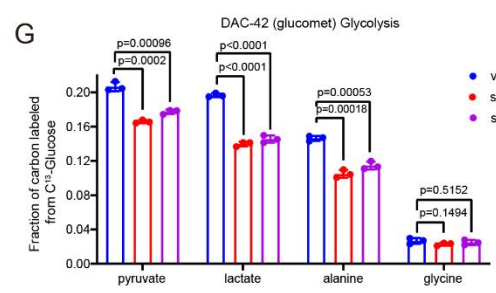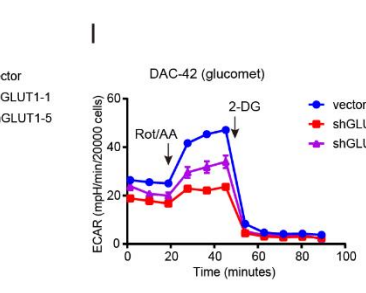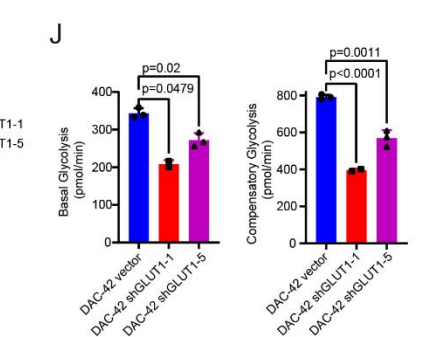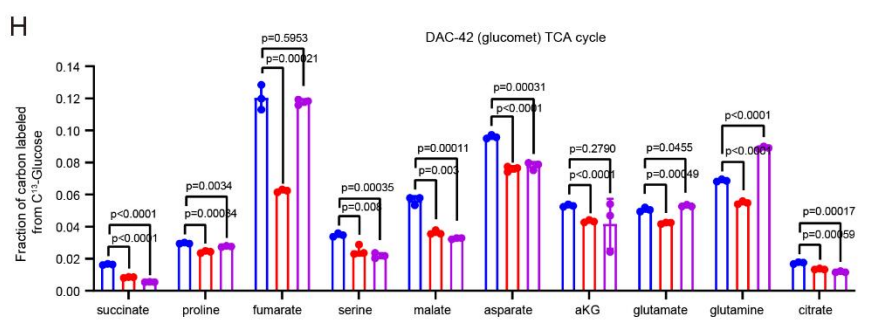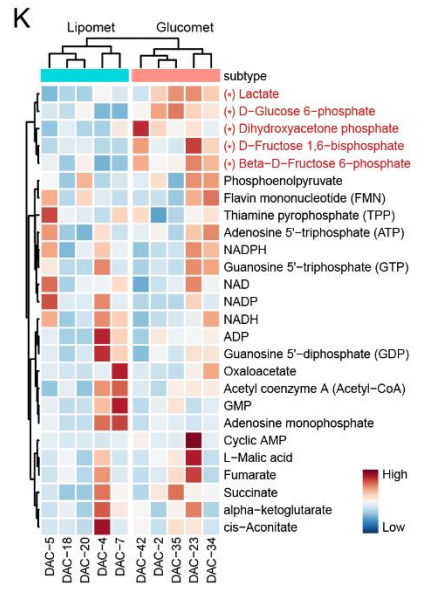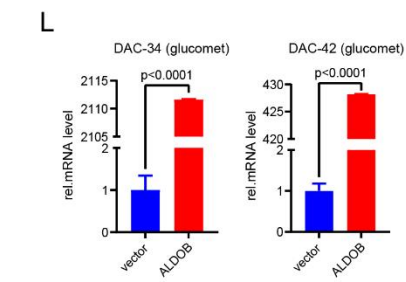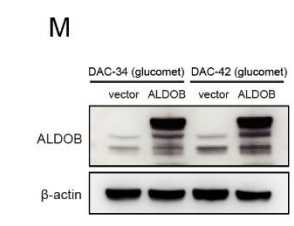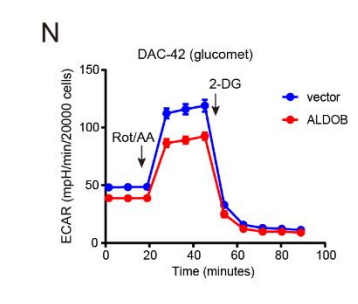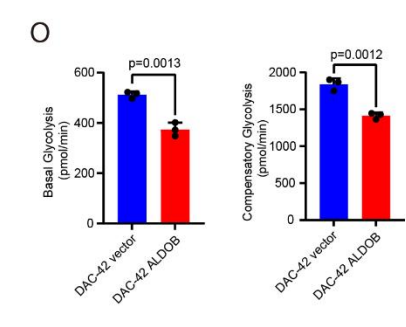

**Figure S2. GLUT1 and ALDOB drive glycolysis and TCA cycle reprogramming in glucomet-PDAC.** Related to Figure 3. (A) Tumor growth curves were analyzed in a xenograft mouse model injected with the indicated organoids. The slope of the curve represents the growth rate of the xenografts. (B) The proliferative rates of represented organoids of two metabolic subtypes in vitro (n = 3 technical replicates). ATP content in cells was detected on days 0, 1, 2, 4 and 6 by CellTiter-Glo assays. (C) CellTiter-Glo assays performed on equal numbers of growtharrested cells from glucomet-PDAC show an elevated signal compared to lipomet-PDAC (n = 3 technical replicates). (D) Normalized AUC distribution for the glucose effect on organoid growth. The significance of the difference was determined by unpaired Student's t test. (E) RT-PCR analysis *GLUT1* knockdown efficiency in the indicated organoids (n = 3 technical replicates). (F) Western blot analysis of GLUT1 knockdown efficiency in DAC-34 (glucomet) organoids. (G and H) Fractions of labeled metabolites in glycolysis (G) and the TCA cycle (H) from [U-<sup>13</sup>C<sub>6</sub>] glucose in control and *GLUT1* knockdown organoids (n = 3 technical replicates). (I and J) Control and *GLUT1* knockdown organoids (DAC-42) were exposed to rotenone/antimycin A and 2-DG to measure the ECAR at the basal level and compensatory level by the Seahorse XF Glycolytic Rate Assay (n = 3 technical replicates). (K) Heatmap of Metabolon-based energy metabolism showing the metabolite intensity differences in glucomet-PDAC and lipomet-PDAC. Red denotes significant intensity differences in metabolites. Significance was computed by the Wilcoxon rank-sum test (\*: p<0.05). (L) RT-PCR analysis of *ALDOB* overexpression efficiency in the indicated organoids (n = 3 technical replicates). (M) Western blot analysis of ALDOB overexpression in DAC-34 (glucomet) and DAC-42 (glucomet) organoids. (N and O) Control and *ALDOB* overexpression organoids (DAC-42) were exposed to rotenone/antimycin A and 2-DG to measure the ECAR at the basal level and compensatory level by the Seahorse XF Glycolytic Rate Assay (n = 3 technical replicates). Data are presented as the mean values ± SEMs, statistical significance was computed by unpaired Student's t test.

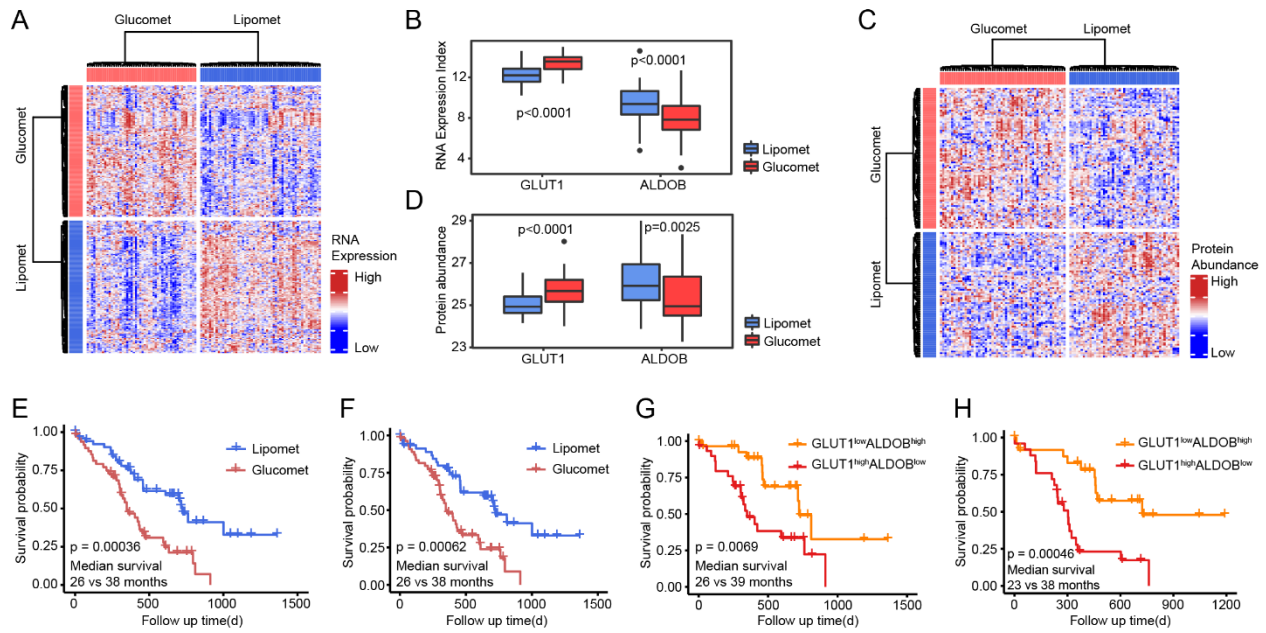

**Figure S3. Consensus-clustered of tumors in the published PDAC cohort split by metabolism signature genes.** Related to Figure 4. (A) Heatmap of tumors in the published PDAC cohort (n = 105) split by glucomet and lipomet signature genes in RNA level. (B) Boxplot of *GLUT1* and *ALDOB* RNA expression levels in the PDAC cohort stratified by metabolic subgroup. (C) Heatmap of tumors in the PDAC cohort (n = 105) split by glucomet and lipomet signature genes in protein level. (D) Boxplot of *GLUT1* and *ALDOB* protein expression levels in the PDAC cohort stratified by metabolic subgroup. (E and F) Kaplan-Meier survival curves of the Cao PDAC cohort showing differential prognosis among patients with different RNA (E) and protein (F) subtypes. (G and H) Kaplan-Meier survival curves based on the expression of *GLUT1* and *ALDOB* in RNA (G) and protein (H) levels. Data are presented as the mean values  $\pm$  SEMs, statistical significance was computed by limma (B and D). Statistical significance was computed by log-rank test (E-H).

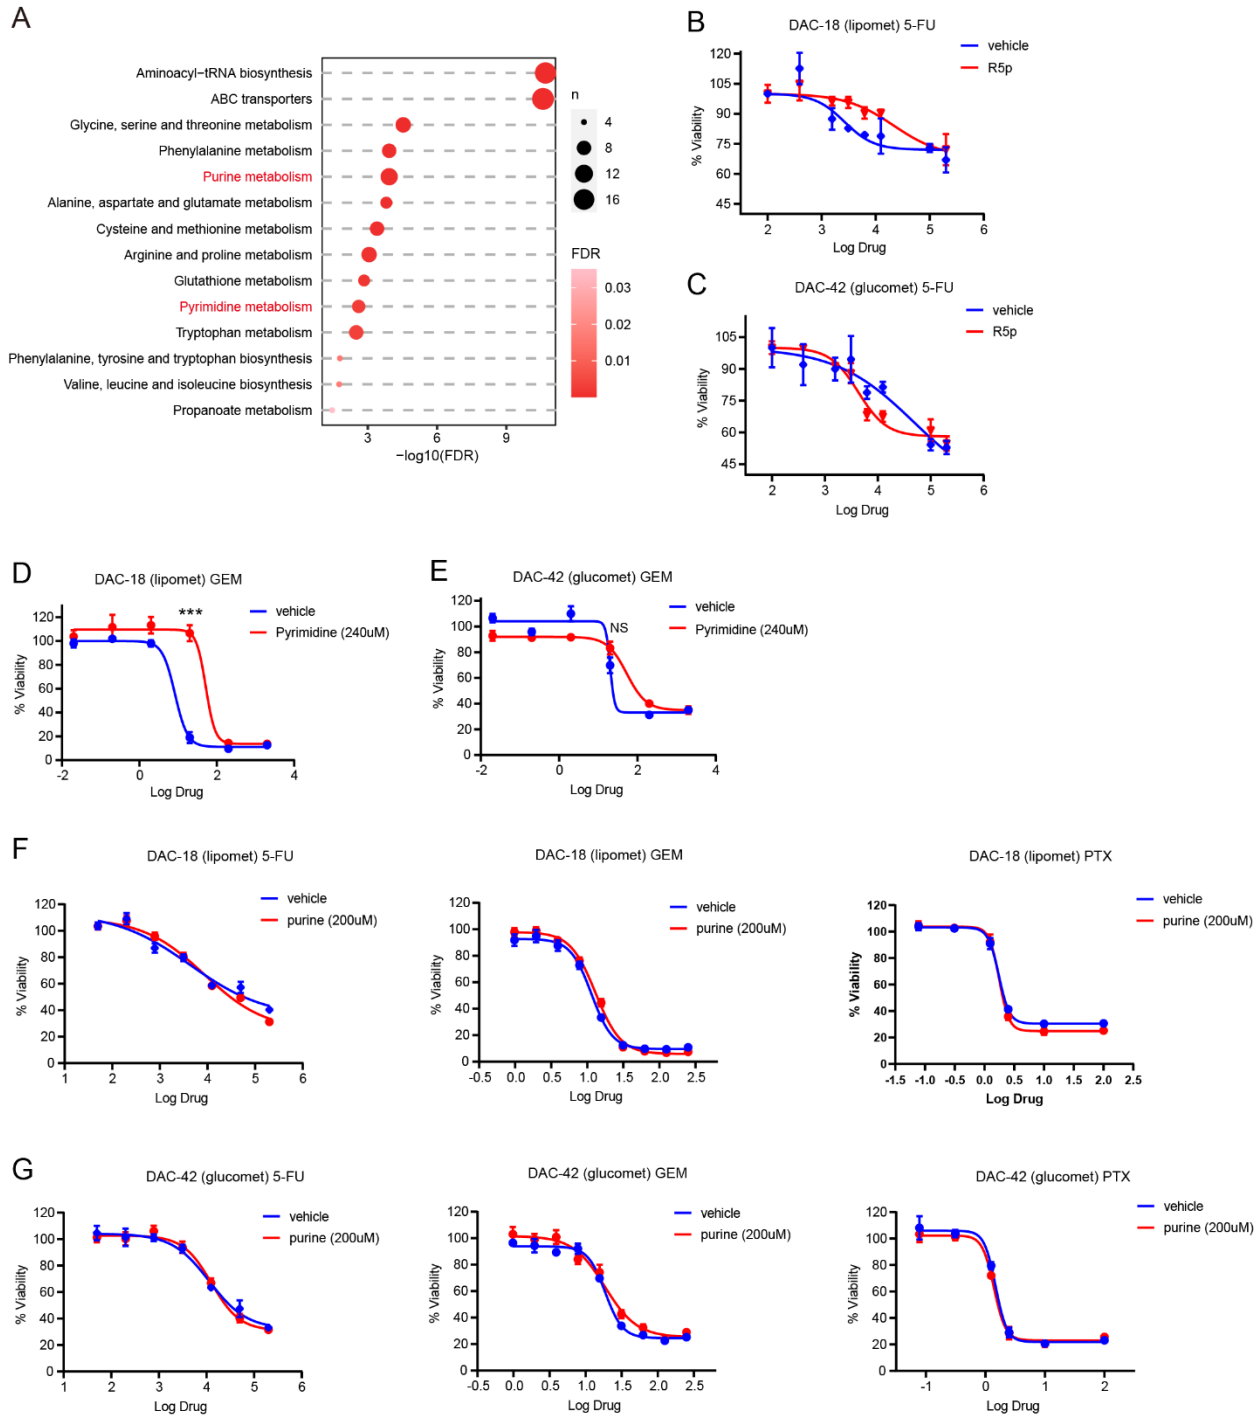

**Figure S4. Increased nucleoside synthesis in glucomet-PDAC.** Related to Figure 5. (A) Enrichment analysis of elevated metabolomics in glucomet subtypes (n = 140 metabolomics, FDR < 0.05, MBROLE 2.0). (B and C) Effect of R5P (1 mM) on 5-FU sensitivity in DAC-18 (lipomet) and DAC-42 (glucomet) cells by CellTiter-Glo assays at 5 days posttreatment. (D and E) DAC-18 (lipomet) and DAC-42 (glucomet) organoids were treated with GEM alone or in combination with pyrimidine nucleosides (uridine, cytidine and thymidine, 240 $\mu$ M), and cell viability was determined by CellTiter-Glo assays. (F and G) DAC-18 (lipomet) and DAC-42 (glucomet) organoids were treated with the indicated chemo alone or in combination with purine nucleosides (guanosine and adenosine, 200  $\mu$ M) for 5 days, and cell viability was determined by CellTiter-Glo assays. All dose-responsive curves are performed with 3 technical replicates. Data are presented as the mean values  $\pm$  SEMs, statistical significance was computed by unpaired Student's t test (\*: p<0.05; \*\*: p<0.01; \*\*\*: p<0.001).

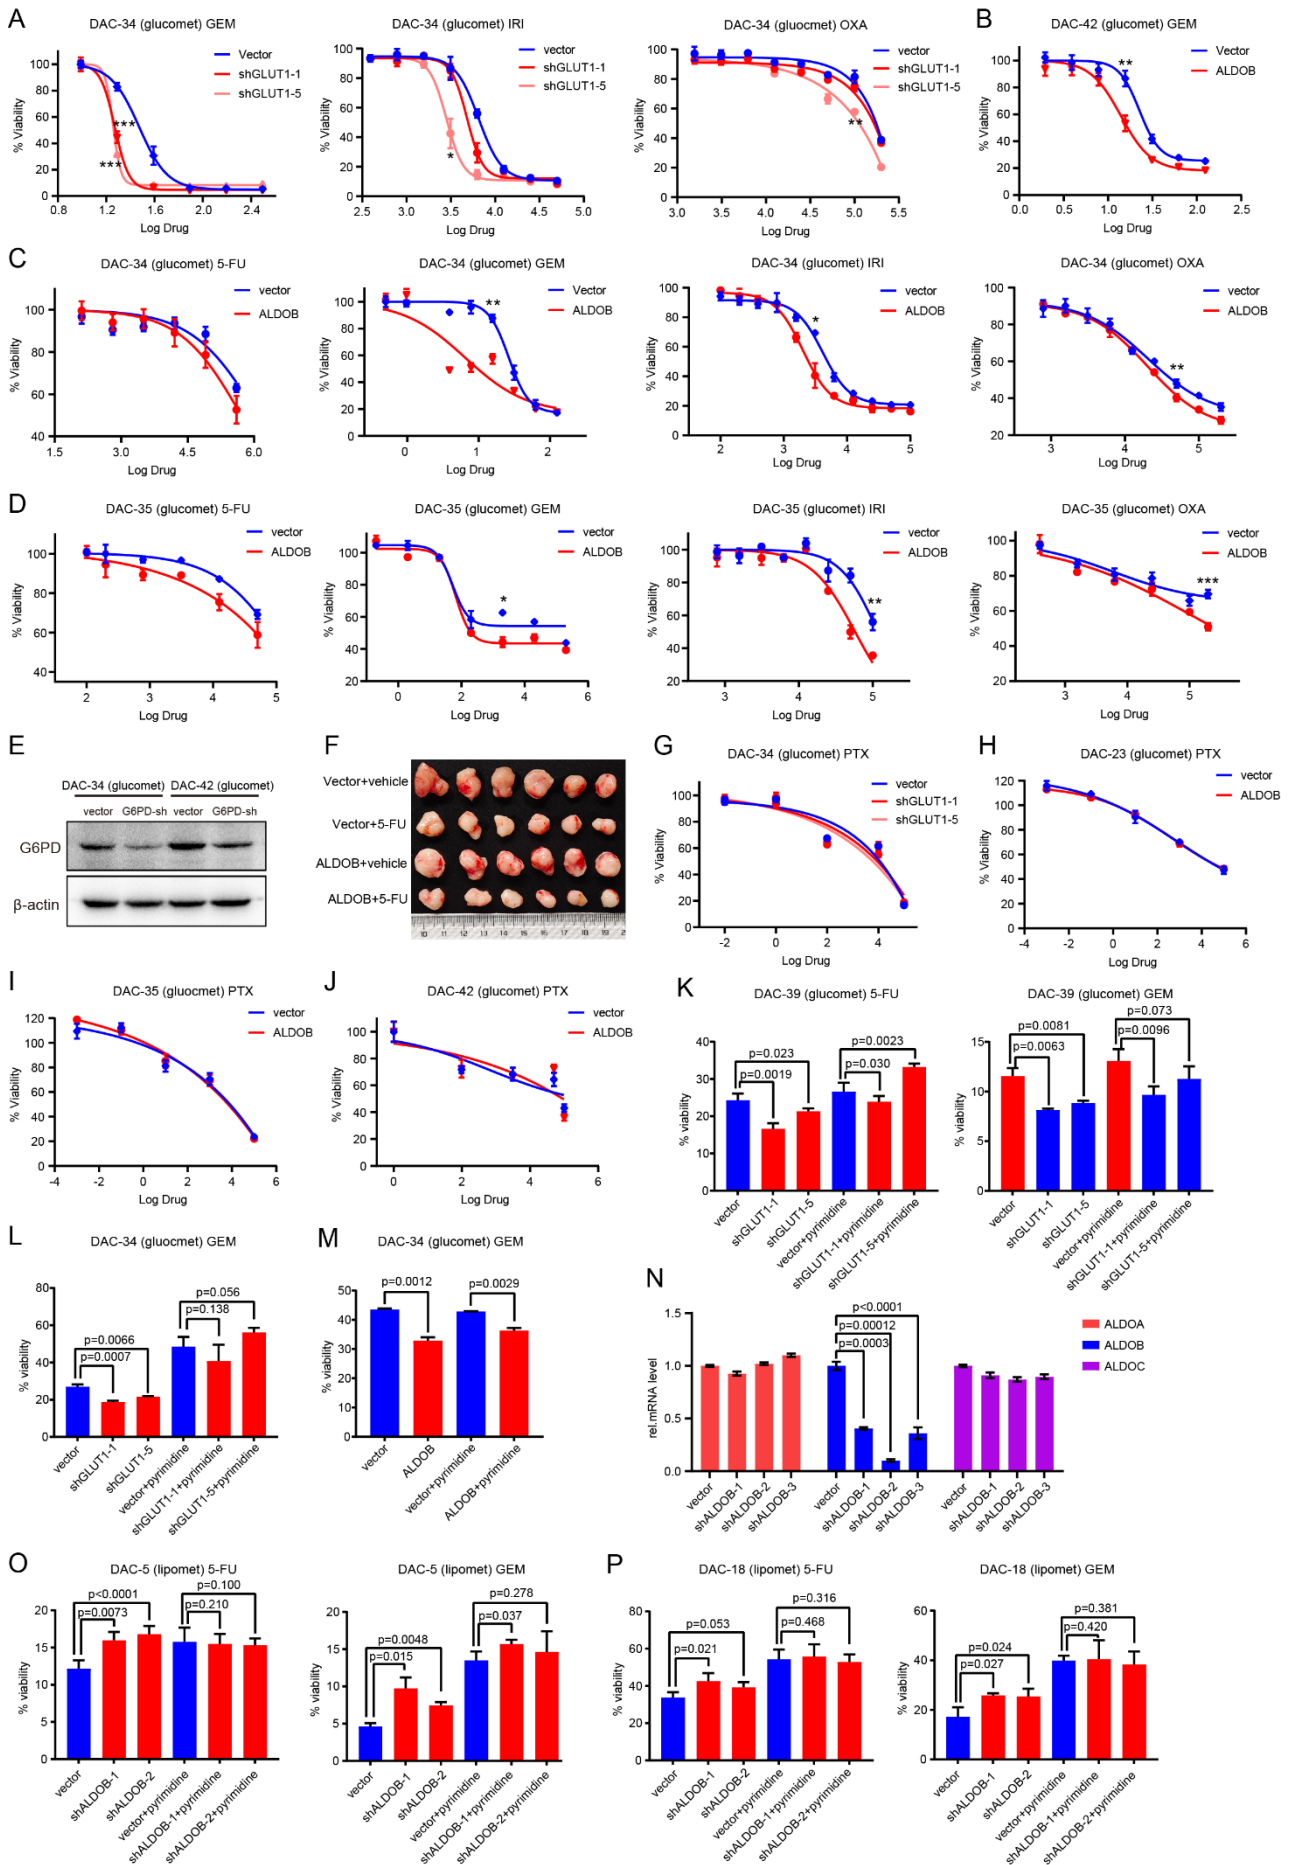



**Figure S5. The GLUT1/ALDOB/G6PD axis contributes to drug resistance.** Related to Figure 5. (A) Effect of *GLUT1* knockdown on GEM, IRI and OXA responsiveness of DAC-34 (glucomet) as determined by CellTiter-Glo assays 120 hr after treatment with GEM, IRI or OXA. (B-D) Effect of *ALDOB* overexpression on the response to the indicated chemotherapy for DAC-42 (glucomet), DAC-34 (glucomet) and DAC-35 (glucomet) as determined by CellTiter-Glo assays 120 hr after treatment with chemotherapy. (E) Western blot analysis of G6PD knockdown efficiency in DAC-34 (glucomet) and DAC-42 (glucomet) organoids. (F) Image of xenografts in the ODX model isolated from each group at day 16 of drug treatment. (G) Effect of *GLUT1* knockdown on PTX of DAC-34 (glucomet) as determined by CellTiter-Glo assays. (H-J) Effect of *ALDOB* overexpression on PTX of DAC-23 (glucomet), DAC-35 (glucomet) and DAC-42 (glucomet) as determined by CellTiter-Glo assays 120 hr after treatment with chemotherapy. (K and L) Effect of pyrimidine nucleotide (240  $\mu$ M) on 5-FU or GEM sensitivity in control and *GLUT1* knockdown organoids by CellTiter-Glo assays at 120 hr posttreatment. (M) Effect of pyrimidine nucleotide (240  $\mu$ M) on GEM sensitivity in control and *ALDOB*-overexpressing organoids by CellTiter-Glo assays at 120 hr posttreatment. (N) RT-PCR analysis of *ALDOB* knockdown efficiency and specificity in DAC-5 (lipomet) organoids. (O and P) Effect of pyrimidine nucleotides (240  $\mu$ M) on 5-FU and GEM sensitivity in control and *ALDOB* knockdown DAC-5 (lipomet) or DAC-18 (lipomet) organoids by CellTiter-Glo assays at 120 hr posttreatment. All dose-responsive curves are performed with 3 technical replicates. All dose-responsive curves are performed with 3 technical replicates. Data are presented as the mean values  $\pm$  SEMs, statistical significance was computed by unpaired Student's t test (\*:  $p < 0.05$ ; \*\*:  $p < 0.01$ ; \*\*\*:  $p < 0.001$ ) (A-D).

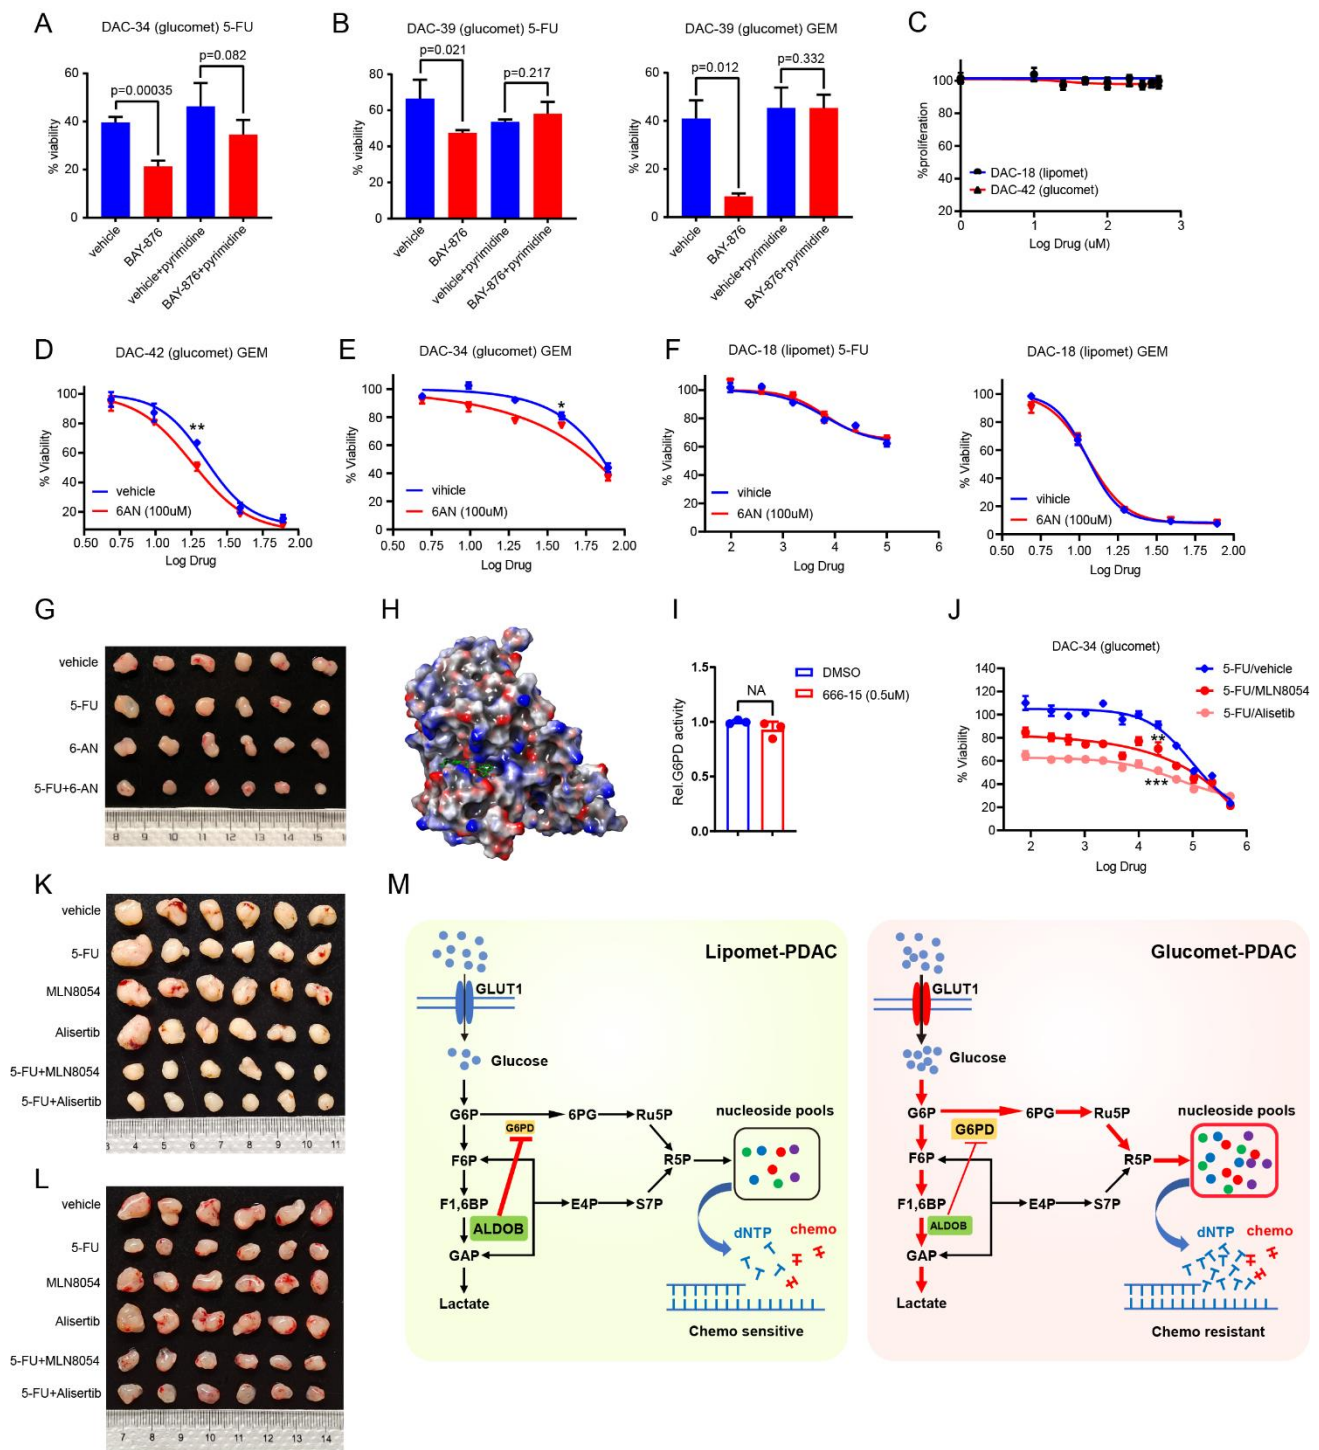

**Figure S6. Pharmacological inhibition of GLUT1 or G6PD improves chemotherapy sensitivity.** Related to Figure 6. (A and B) Effect of pyrimidine nucleotides (240  $\mu$ M) on 5-FU and GEM sensitivity in control and GLUT1 inhibition glucomet-PDAC (DAC-34 and DAC-39) by CellTiter-Glo assays at 120 hr posttreatment (n = 3 technical replicates). (C) The effect of the G6PD inhibitor 6AN on cell viability was evaluated in DAC-18 (lipomet) and DAC-42 (glucomet) organoids (n = 3 technical replicates). (D and E) Effect of 6AN treatment on GEM responsiveness of DAC-42 (D) and DAC-34 (E) organoids as determined by CellTiter-Glo assays 120 hr after treatment with GEM. (F) Effect of 6AN treatment on 5-FU and GEM responsiveness of DAC-18 (lipomet) organoids as determined by CellTiter-Glo assays 120 hr after treatment with 5-FU or GEM. (G) Image of DAC-42 (glucomet) xenografts in the ODX model isolated from each group at day 8 of drug treatment (n = 6 tumors). (H) Prediction of the potential interaction sites in the 3D structure of the G6PD

protein with 666-15. (I) Effect of 666-15 on G6PD activity in DAC-42 (glucomet) organoids (n = 3 technical replicates). (J) Effect of MLN8054 or alisertib treatment on the 5-FU responsiveness of DAC-34 (glucomet) organoids as determined by CellTiter-Glo assays 120 hr after treatment with 5-FU. (K and L) Image of glucomet-PDAC DAC-42 (K) and lipomet-PDAC DAC-18 (L) xenografts in the ODX model isolated from each group with indicated drug treatment (n = 6 tumors). (M) Schematic model for glucose reprogramming explaining the glucomet-PDAC drug resistance mechanism. All dose-responsive curves are performed with 3 technical replicates. Data are presented as the mean values  $\pm$  SEMs, statistical significance was computed by unpaired Student's t test (\*:  $p < 0.05$ ; \*\*:  $p < 0.01$ ; \*\*\*:  $p < 0.001$ ) (A-F, I and J).
